# Supplementary material for: An intrinsically disordered region mediates RNA-binding selectivity and pro-oncogenic activities of LARP6
Source: bioRxiv preprint, doi:10.1101/2024.09.20.614075, version 2 (2025-04-15)
Supplement: Supplementary Datasets S1 to S4 [file 614075_file04.xlsx]

## Sheet: Dataset S1
Chromosome	Start	End	Strand	Peak Score
chr7	5527484	5527516	-	2098
chr5	179614717	179614736	-	720
chrX	78126079	78126101	+	676
chr17	1400078	1400097	-	555
chr14	49586783	49586840	+	350
chr5	138934167	138934189	+	305
chr1	149692867	149692886	-	267
chr14	55684210	55684240	+	252
chr11	70436273	70436294	+	228
chr19	38729953	38730007	+	224
chr6	28478674	28478692	-	191
chr4	77075700	77075746	-	185
chrX	53462197	53462215	+	180
chr22	41246378	41246401	-	167
chr6	7289370	7289405	-	165
chr1	231422312	231422329	-	161
chr5	78476601	78476626	+	159
chr2	63891283	63891326	+	158
chr16	55484061	55484119	+	156
chr2	200478273	200478306	+	155
chr2	218274367	218274385	-	154
chr7	76327133	76327181	-	151
chr16	71928387	71928412	+	148
chr1	8867200	8867257	-	146
chr2	203427965	203427988	+	145
chr12	49764103	49764136	+	143
chr15	89335083	89335117	+	137
chrX	78104145	78104315	+	137
chrX	78126109	78126129	+	137
chr2	234494936	234494958	-	135
chr5	181241610	181241642	-	134
chr2	203427922	203427956	+	133
chr11	65890662	65890680	+	131
chr1	113895364	113895425	-	126
chr17	81510318	81510391	-	123
chr2	43011127	43011144	-	123
chr14	49853868	49853887	-	122
chr2	219289961	219289980	-	122
chr15	74410006	74410027	-	118
chr11	70436312	70436337	+	117
chr19	45478641	45478661	-	116
chr3	113720430	113720450	-	115
chr15	69453663	69453694	+	113
chr2	112646915	112646937	+	113
chr14	101986536	101986598	+	110
chr16	74774666	74774684	-	109
chr16	87384048	87384077	-	109
chr11	61967458	61967485	-	107
chr15	63071701	63071749	+	107
chrX	78103914	78104039	+	107
chr13	98018583	98018617	+	106
chr2	54987603	54987704	-	105
chr6	122444830	122444867	-	105
chr1	20485562	20485594	-	104
chr14	73588852	73588872	-	101
chr11	110231104	110231132	-	100
chr2	234494969	234494990	-	100
chr11	69653033	69653079	+	99
chr1	28200925	28200955	-	98
chr7	94394961	94395003	+	98
chr15	52550725	52550774	-	97
chrX	41348466	41348492	+	97
chr1	201969898	201969918	+	96
chr3	41240255	41240345	+	96
chr15	74410497	74410559	-	94
chr5	140726158	140726191	+	94
chr10	102480063	102480092	-	93
chr17	60786222	60786274	+	93
chr17	50201540	50201569	-	92
chr6	151355791	151355828	+	92
chr10	126017055	126017139	-	91
chr1	16396570	16396660	+	90
chr3	86946315	86946348	-	90
chr17	75248391	75248408	-	89
chr17	50074217	50074275	+	88
chr3	31636631	31636675	+	88
chr15	72199265	72199329	-	87
chr8	61684096	61684115	-	87
chr2	108685769	108685800	+	86
chr17	39531390	39531426	+	85
chr19	38730011	38730120	+	84
chr11	61965088	61965112	-	83
chr12	57181216	57181266	+	83
chr17	28860824	28860928	+	83
chr1	154214505	154214530	-	82
chr7	135927622	135927666	-	82
chr15	72199479	72199578	-	81
chr16	1700988	1701013	+	81
chr14	61795065	61795123	+	80
chr6	133837316	133837348	+	80
chr6	136259154	136259178	-	80
chr1	8012385	8012445	-	78
chr10	77637520	77637563	-	78
chr12	111447729	111447794	+	78
chr22	35739350	35739389	-	77
chr1	222733719	222733783	+	76
chr12	49764065	49764092	+	75
chr3	113720390	113720423	-	75
chr6	26330326	26330348	-	75
chr7	99419535	99419560	+	75
chr1	167765669	167765690	+	74
chr11	65900320	65900342	-	74
chr21	8218670	8218735	+	74
chr14	22565030	22565110	-	73
chr2	237334686	237334703	-	73
chr5	151808626	151808656	+	73
chr7	135927672	135927695	-	73
chr8	47773820	47773838	-	73
chr9	35657937	35657995	-	73
chr1	27405830	27405859	-	72
chr15	72199075	72199210	-	72
chr1	1786246	1786274	-	71
chr12	6968467	6968507	-	71
chr2	26135873	26135948	+	71
chrX	123908099	123908164	+	71
chr11	840333	840367	-	70
chr11	35230646	35230689	+	70
chr12	111447392	111447450	+	70
chr6	151355834	151355856	+	70
chr7	101137976	101138002	+	70
chr15	64155920	64156003	-	69
chr1	201969854	201969888	+	68
chr3	30692803	30692833	+	68
chr1	227193846	227193867	-	66
chr11	61967594	61967642	-	66
chr14	70031770	70031794	+	66
chr17	4948486	4948541	-	66
chrM	7672	7711	+	66
chrX	78126271	78126305	+	66
chrX	151407298	151407334	+	66
chr2	27051241	27051268	+	65
chr2	109301902	109301919	+	65
chr5	151808580	151808615	+	65
chr16	8855055	8855095	-	64
chrX	78104045	78104115	+	64
chr16	67438415	67438440	-	63
chr6	133476074	133476091	+	63
chr8	56074064	56074106	-	63
chr1	1786306	1786353	-	62
chr14	102085349	102085397	-	62
chr2	118108801	118108820	+	62
chr1	20485611	20485653	-	61
chr1	159141639	159141660	-	61
chr3	123613906	123613939	-	61
chr7	128769784	128769868	+	61
chr10	86437511	86437533	-	60
chr11	840288	840318	-	60
chr12	106237944	106237972	-	60
chr3	45224691	45224739	-	60
chr4	26431869	26431902	+	60
chr5	97032671	97032716	+	60
chr7	116560155	116560189	+	60
chrM	11198	11268	+	60
chr1	227193883	227193926	-	59
chr17	81681443	81681463	-	59
chr4	6642212	6642288	+	59
chr1	55081317	55081361	-	58
chr19	1435076	1435098	+	58
chr2	10129554	10129577	+	58
chr2	46356746	46356777	+	58
chr3	32481719	32481786	-	58
chr14	49853797	49853825	-	57
chr16	71928416	71928443	+	57
chr1	230280115	230280153	+	56
chr10	17229377	17229471	+	56
chr16	28135258	28135289	-	56
chr18	9860648	9860683	+	56
chr3	127691238	127691269	-	56
chr6	34245035	34245061	+	56
chr9	128917327	128917408	+	56
chr11	35232161	35232234	+	55
chr17	76679723	76679759	-	55
chrM	14336	14433	-	55
chr17	81510087	81510218	-	54
chr2	43467956	43467974	-	54
chr2	54973062	54973113	-	54
chr20	35949434	35949454	+	54
chr4	93155037	93155057	+	54
chr4	152400586	152400618	-	54
chr7	139566596	139566622	-	54
chrM	12570	12631	+	54
chrM	15411	15538	+	54
chr10	33256320	33256350	-	53
chr12	56644860	56644892	-	53
chr12	122865858	122865917	-	53
chr19	2101678	2101706	-	53
chr3	196050146	196050177	-	53
chr6	83164785	83164804	+	53
chrX	154018086	154018121	-	53
chr16	46674401	46674435	-	52
chr17	1361096	1361121	-	52
chr19	2233716	2233747	-	52
chr22	20949863	20949894	+	52
chr22	37675626	37675716	+	52
chr4	152911279	152911345	+	52
chr6	31862634	31862676	-	52
chr9	112687456	112687512	-	52
chr1	161422157	161422174	-	51
chr11	65900250	65900309	-	51
chr14	22846485	22846523	+	51
chr2	112663179	112663223	+	51
chr1	152032768	152032791	-	50
chr10	73007783	73007834	-	50
chr11	35230484	35230516	+	50
chr11	63625064	63625130	-	50
chr14	103341494	103341578	+	50
chr8	11847101	11847137	-	50
chr8	61625869	61625971	-	50
chr9	133361741	133361819	-	50
chrY	12273667	12273687	+	50
chr10	73249396	73249430	-	49
chr10	97456779	97456818	+	49
chr11	35221702	35221734	+	49
chr11	69652956	69652990	+	49
chr14	68884252	68884295	-	49
chr15	48415729	48415760	-	49
chr7	99419474	99419512	+	49
chr9	114598191	114598214	+	49
chr10	17236291	17236381	+	48
chr11	10802188	10802220	-	48
chr11	62630194	62630250	-	48
chr17	28648672	28648705	-	48
chr2	33389263	33389306	+	48
chr3	177021454	177021509	-	48
chr3	179588284	179588306	+	48
chr6	27505852	27505892	-	48
chr7	101137928	101137971	+	48
chr8	8891750	8891876	-	48
chr10	32911929	32911964	-	47
chr12	51242465	51242527	+	47
chr17	50194352	50194423	-	47
chr17	66806020	66806067	+	47
chr22	35739396	35739424	-	47
chr6	28643460	28643484	+	47
chr7	2730187	2730218	-	47
chr7	134969680	134969763	+	47
chr10	74119244	74119276	+	46
chr11	47466935	47466953	-	46
chr20	3805223	3805314	+	46
chr20	41163417	41163475	+	46
chrM	15558	15669	+	46
chr10	91863618	91863644	+	45
chr14	68788617	68788741	-	45
chr15	44717659	44717759	+	45
chr15	69452807	69452873	+	45
chr17	44803446	44803497	-	45
chr19	2430316	2430357	-	45
chr4	10116177	10116242	-	45
chr4	165342764	165342806	+	45
chr5	17276221	17276267	+	45
chr5	137754262	137754304	-	45
chrM	8587	8664	+	45
chr1	36348733	36348810	-	44
chr1	55068386	55068407	-	44
chr1	205714666	205714726	-	44
chr11	35231019	35231082	+	44
chr11	65890716	65890736	+	44
chr12	110731818	110731848	-	44
chr20	44499694	44499717	-	44
chr3	98799793	98799839	-	44
chr4	7762285	7762350	-	44
chr9	87726127	87726150	+	44
chr1	1786358	1786388	-	43
chr1	31497670	31497691	-	43
chr11	62529208	62529291	-	43
chr14	103341581	103341607	+	43
chr17	50201512	50201530	-	43
chr3	98901143	98901265	-	43
chr3	141447877	141447907	+	43
chr3	146110423	146110446	-	43
chr4	173331970	173332014	-	43
chr9	37863510	37863578	+	43
chr12	132772160	132772214	-	42
chr14	90405171	90405311	+	42
chr19	2101364	2101413	-	42
chr5	136063458	136063503	+	42
chr8	69922964	69922981	-	42
chr1	28200976	28200995	-	41
chr1	119929094	119929131	-	41
chr10	17233785	17233873	+	41
chr10	71817451	71817470	-	41
chr11	35230524	35230581	+	41
chr12	6531750	6531771	+	41
chr20	35557182	35557250	+	41
chr21	37202649	37202677	+	41
chr21	41887855	41887893	-	41
chr3	156540950	156540984	-	41
chr5	154815590	154815663	+	41
chrX	49071280	49071334	-	41
chr1	20483426	20483518	-	40
chr1	100976193	100976223	+	40
chr14	96566213	96566241	+	40
chr2	218274401	218274434	-	40
chr20	36049675	36049715	-	40
chr3	48468547	48468602	-	40
chr8	26653243	26653282	+	40
chr9	35658008	35658029	-	40
chrM	10847	10934	+	40
chr11	65891265	65891298	+	39
chr12	56644829	56644859	-	39
chr14	51254603	51254642	+	39
chr17	81510593	81510700	-	39
chr2	10129588	10129608	+	39
chr2	65087983	65088031	-	39
chr2	237341112	237341152	-	39
chr20	31606416	31606442	+	39
chr3	196829709	196829739	+	39
chr5	176509079	176509133	+	39
chr6	122456555	122456586	-	39
chr9	119276005	119276023	-	39
chr1	11056012	11056043	-	38
chr10	17229823	17229933	+	38
chr10	17235257	17235396	+	38
chr10	32894988	32895008	-	38
chr12	1494060	1494118	+	38
chr12	13215389	13215414	+	38
chr13	98018628	98018654	+	38
chr14	22920658	22920681	-	38
chr15	31376345	31376375	+	38
chr15	63071357	63071388	+	38
chr19	55095437	55095462	-	38
chr2	70280661	70280727	+	38
chr2	215383461	215383484	-	38
chr21	41993128	41993148	-	38
chr3	52533616	52533647	-	38
chr4	77075750	77075768	-	38
chr5	136063603	136063687	+	38
chr6	34245121	34245177	+	38
chr6	43785974	43786001	+	38
chr7	76327917	76327954	-	38
chr9	104831747	104831813	-	38
chr1	154207313	154207352	-	37
chr12	89603216	89603252	-	37
chr13	76882559	76882604	-	37
chr14	54420049	54420100	+	37
chr3	196829749	196829769	+	37
chr5	96774465	96774491	+	37
chr8	23136360	23136405	-	37
chr9	76571807	76571831	+	37
chrM	6205	6262	+	37
chrX	78103854	78103905	+	37
chr1	159918443	159918537	-	36
chr10	77854339	77854356	-	36
chr14	22920691	22920727	-	36
chr14	49853907	49853927	-	36
chr15	56029856	56029876	-	36
chr17	47656884	47656928	+	36
chr2	187465021	187465061	-	36
chr2	219289992	219290057	-	36
chr2	237352518	237352560	-	36
chr20	31801628	31801657	+	36
chr5	72205513	72205613	+	36
chrM	11044	11095	+	36
chrX	154357441	154357472	-	36
chr1	154583330	154583355	-	35
chr1	225402248	225402285	-	35
chr12	6534506	6534566	+	35
chr14	58508583	58508606	+	35
chr17	5022216	5022254	+	35
chr2	84906382	84906454	+	35
chr21	46125867	46125930	+	35
chr7	94395014	94395033	+	35
chr7	135675088	135675121	+	35
chr9	105366365	105366407	+	35
chrX	124037541	124037564	+	35
chr11	18405524	18405546	+	34
chr11	47466959	47467003	-	34
chr16	55505920	55506020	+	34
chr19	2101474	2101567	-	34
chr2	237334723	237334758	-	34
chr20	58360373	58360418	+	34
chr22	41246490	41246555	-	34
chr5	72909603	72909652	+	34
chr1	28201008	28201033	-	33
chr11	13729888	13729913	+	33
chr11	65505154	65505189	+	33
chr11	65855012	65855053	-	33
chr12	111447451	111447497	+	33
chr17	62666485	62666519	+	33
chr17	81843449	81843564	-	33
chr18	23482945	23482969	+	33
chr22	41246345	41246374	-	33
chr5	179729273	179729340	+	33
chr6	28863749	28863767	-	33
chr7	44213623	44213676	+	33
chr9	130854956	130854978	+	33
chr1	151983003	151983041	-	32
chr1	162781596	162781652	+	32
chr10	71817420	71817441	-	32
chr11	866895	866945	+	32
chr11	866952	866981	+	32
chr12	49272918	49272973	+	32
chr12	120701032	120701066	+	32
chr14	81277213	81277239	-	32
chr14	96566934	96566968	+	32
chr14	96566971	96566993	+	32
chr14	101986133	101986187	+	32
chr16	55482957	55483001	+	32
chr16	57153524	57153555	-	32
chr17	42403235	42403279	-	32
chr2	112520302	112520338	+	32
chr3	133589654	133589676	+	32
chr4	155347279	155347308	-	32
chr5	32602033	32602063	+	32
chr7	128770484	128770565	+	32
chr7	128848943	128848978	+	32
chr8	47773784	47773805	-	32
chrM	15893	15938	+	32
chrX	154350000	154350057	-	32
chr1	55081362	55081389	-	31
chr1	183144329	183144365	+	31
chr10	32911649	32911678	-	31
chr10	71821994	71822015	-	31
chr11	65896878	65896944	-	31
chr13	38361883	38361922	+	31
chr14	60124735	60124802	+	31
chr14	69769558	69769608	+	31
chr14	102084954	102085006	-	31
chr16	28842976	28843003	-	31
chr17	42403738	42403774	-	31
chr17	81510226	81510274	-	31
chr2	131048827	131048878	-	31
chr22	40827151	40827188	-	31
chr3	98798675	98798780	-	31
chr4	98471368	98471401	-	31
chr6	75253347	75253404	-	31
chr6	81746468	81746512	-	31
chr7	101138004	101138041	+	31
chr7	128840648	128840675	+	31
chr8	100703260	100703351	-	31
chrX	151409234	151409284	+	31
chr1	6592278	6592329	-	30
chr1	145465766	145465788	-	30
chr10	17229321	17229374	+	30
chr10	17235158	17235238	+	30
chr11	62516398	62516456	-	30
chr12	16364099	16364153	+	30
chr12	120694856	120694893	+	30
chr14	58239945	58239980	-	30
chr15	60347418	60347445	-	30
chr15	72199338	72199384	-	30
chr18	63389948	63390002	-	30
chr19	3976170	3976220	-	30
chr19	46610344	46610409	+	30
chr2	28869726	28869749	-	30
chr2	152143922	152143944	-	30
chr20	32334450	32334502	+	30
chr20	49319323	49319341	-	30
chr20	63933044	63933065	+	30
chr7	2380499	2380565	+	30
chrM	8666	8720	+	30
chrM	11727	11771	+	30
chr1	16889693	16889721	+	29
chr1	156742907	156742946	-	29
chr10	17235838	17235886	+	29
chr10	32911616	32911642	-	29
chr11	61964721	61964750	-	29
chr11	77665473	77665503	-	29
chr12	49129529	49129616	-	29
chr12	123034622	123034655	-	29
chr15	72217421	72217469	-	29
chr17	4945751	4945832	-	29
chr19	12939481	12939525	+	29
chr20	31514686	31514733	+	29
chr20	50958491	50958543	-	29
chr3	128813398	128813511	+	29
chr7	55470720	55470768	-	29
chr7	76328563	76328629	-	29
chr8	28346861	28346887	-	29
chr8	97726188	97726250	+	29
chrM	4833	4905	+	29
chrM	9045	9080	+	29
chr1	228493874	228493917	+	28
chr10	32911888	32911927	-	28
chr11	35221650	35221693	+	28
chr12	112508140	112508175	+	28
chr13	98021854	98021883	+	28
chr13	98022005	98022032	+	28
chr14	102084793	102084952	-	28
chr14	103503772	103503792	+	28
chr15	45521962	45521995	-	28
chr16	88715500	88715527	-	28
chr17	5022132	5022169	+	28
chr17	16440189	16440221	+	28
chr17	50080170	50080199	+	28
chr18	670704	670729	+	28
chr19	46920675	46920696	+	28
chr2	69387196	69387226	-	28
chr2	131147099	131147144	+	28
chr2	215386719	215386765	-	28
chr20	62852292	62852346	-	28
chr4	1900767	1900805	+	28
chr5	17276271	17276296	+	28
chr5	151663064	151663110	-	28
chr5	151804746	151804813	+	28
chr7	128769963	128770073	+	28
chr9	127506073	127506109	-	28
chrM	9823	9867	+	28
chr1	161531102	161531119	+	27
chr1	178916836	178916878	+	27
chr10	17229592	17229646	+	27
chr10	29421742	29421779	+	27
chr10	86437542	86437567	-	27
chr11	59551766	59551809	+	27
chr11	65896967	65896997	-	27
chr12	55727192	55727252	-	27
chr13	98519256	98519334	-	27
chr16	57153556	57153586	-	27
chr18	12310984	12311010	+	27
chr2	47280785	47280802	-	27
chr2	215419284	215419362	-	27
chr2	218959722	218959742	+	27
chr4	155347317	155347341	-	27
chr6	26104252	26104277	+	27
chr6	75253419	75253455	-	27
chr8	23842284	23842343	-	27
chr8	94250220	94250254	-	27
chr9	127691489	127691530	+	27
chr1	2307788	2307808	+	26
chr1	152032726	152032762	-	26
chr1	178916807	178916825	+	26
chr1	228493920	228493940	+	26
chr11	18407467	18407551	+	26
chr11	123084506	123084530	-	26
chr12	6537584	6537696	+	26
chr12	56596546	56596590	-	26
chr14	102081289	102081371	-	26
chr15	83016682	83016730	-	26
chr16	22077117	22077141	+	26
chr17	42403944	42404052	-	26
chr17	58495213	58495276	-	26
chr17	81868517	81868554	-	26
chr19	41344763	41344828	-	26
chr2	200817112	200817137	+	26
chr2	230878532	230878607	+	26
chr20	62139115	62139145	-	26
chr5	136063552	136063589	+	26
chr6	33780136	33780176	-	26
chr7	74099109	74099155	+	26
chr7	149589100	149589117	-	26
chr8	56074460	56074512	-	26
chr8	61714286	61714385	-	26
chr9	33112408	33112445	-	26
chr9	105365604	105365628	+	26
chr9	108979309	108979357	-	26
chr9	130880539	130880558	+	26
chr9	134642242	134642272	+	26
chrM	10699	10754	+	26
chrM	11495	11562	+	26
chrM	12063	12099	+	26
chr1	39563691	39563743	-	25
chr1	119914423	119914451	-	25
chr1	179842470	179842506	-	25
chr10	5918361	5918418	+	25
chr11	502059	502114	-	25
chr11	8988163	8988207	-	25
chr12	6538284	6538325	+	25
chr12	49764396	49764485	+	25
chr12	112502166	112502192	+	25
chr12	131068178	131068195	+	25
chr14	68789409	68789489	-	25
chr14	96566182	96566203	+	25
chr15	44717860	44717944	+	25
chr16	55506025	55506124	+	25
chr18	59328627	59328679	-	25
chr19	10691467	10691492	+	25
chr19	12944091	12944141	+	25
chr19	53875730	53875786	+	25
chr2	37228130	37228182	-	25
chr2	131149548	131149596	+	25
chr2	200478310	200478350	+	25
chr20	38092259	38092301	+	25
chr20	41163710	41163754	+	25
chr22	37225924	37225955	-	25
chr3	179588233	179588281	+	25
chr3	184259570	184259608	-	25
chr4	24527678	24527720	-	25
chr4	87983130	87983221	+	25
chr5	176509142	176509164	+	25
chr5	179729431	179729510	+	25
chr6	28589367	28589385	+	25
chr8	26410556	26410630	+	25
chr8	116846518	116846543	-	25
chr9	91409275	91409308	-	25
chrM	9279	9327	+	25
chrM	12424	12474	+	25
chrX	74586070	74586099	-	25
chr1	2308653	2308701	+	24
chr1	8012559	8012623	-	24
chr1	110233319	110233382	+	24
chr1	154212314	154212366	-	24
chr1	228098046	228098087	+	24
chr1	234606545	234606570	-	24
chr11	809960	809996	+	24
chr11	18407378	18407431	+	24
chr11	61967493	61967524	-	24
chr11	63625192	63625220	-	24
chr12	49184874	49184944	-	24
chr12	110339570	110339618	+	24
chr12	110731862	110731886	-	24
chr12	112022787	112022831	+	24
chr12	112508180	112508258	+	24
chr12	120222564	120222644	-	24
chr12	120697863	120697888	+	24
chr13	76882775	76882797	-	24
chr14	54427130	54427172	-	24
chr14	106636660	106636678	+	24
chr15	74410292	74410344	-	24
chr16	18806166	18806214	-	24
chr16	55482900	55482935	+	24
chr16	66723123	66723150	-	24
chr17	38853716	38853741	-	24
chr17	43211203	43211238	+	24
chr19	41259947	41260047	+	24
chr19	41861163	41861210	+	24
chr2	54456362	54456396	+	24
chr2	74165221	74165285	-	24
chr2	84906494	84906555	+	24
chr2	152175667	152175688	-	24
chr2	235797817	235797865	+	24
chr21	46004460	46004520	+	24
chr21	46112071	46112140	+	24
chr4	67618215	67618255	-	24
chr5	97032724	97032754	+	24
chr5	140117544	140117564	+	24
chr6	116277488	116277526	-	24
chr6	119177401	119177424	-	24
chr6	160109880	160109939	+	24
chr7	2380570	2380630	+	24
chr7	63925823	63925841	-	24
chr9	99142526	99142544	+	24
chr9	134642273	134642290	+	24
chrM	4912	4988	+	24
chrM	7090	7183	+	24
chrX	109642758	109642795	-	24
chrX	119243922	119243947	+	24
chr1	8866395	8866461	-	23
chr1	84671279	84671316	-	23
chr1	203179256	203179306	-	23
chr1	203742683	203742732	+	23
chr10	33254175	33254199	-	23
chr10	74119287	74119312	+	23
chr10	128112361	128112387	-	23
chr11	43344041	43344063	+	23
chr12	31385786	31385822	-	23
chr12	54395650	54395702	-	23
chr14	54427283	54427372	-	23
chr15	32733590	32733630	+	23
chr15	63071398	63071441	+	23
chr15	73927662	73927679	-	23
chr16	11762697	11762720	-	23
chr17	42403678	42403704	-	23
chr2	278119	278186	+	23
chr2	20201528	20201587	-	23
chr2	54972242	54972263	-	23
chr5	72205441	72205478	+	23
chr5	151804390	151804420	+	23
chr6	136259206	136259249	-	23
chr8	38848134	38848184	+	23
chr9	113594124	113594178	+	23
chrX	16853681	16853792	-	23
chr1	153535320	153535360	-	22
chr10	615007	615024	-	22
chr10	17233908	17233934	+	22
chr11	12941817	12941838	+	22
chr11	35229714	35229759	+	22
chr11	63625153	63625173	-	22
chr12	8053118	8053146	+	22
chr12	120698543	120698577	+	22
chr12	121347823	121347878	-	22
chr13	91354176	91354212	+	22
chr14	75134479	75134556	-	22
chr14	100334633	100334663	-	22
chr14	102081678	102081779	-	22
chr15	41561247	41561278	+	22
chr15	48420690	48420723	-	22
chr15	72200582	72200635	-	22
chr16	9103640	9103701	+	22
chr17	4945843	4945940	-	22
chr2	20202145	20202172	-	22
chr2	203436441	203436529	-	22
chr2	215367949	215367987	-	22
chr20	45326636	45326662	-	22
chr20	48625440	48625498	-	22
chr21	8443277	8443306	+	22
chr21	41885530	41885560	-	22
chr22	36281782	36281815	-	22
chr3	3148717	3148752	+	22
chr3	52528218	52528284	-	22
chr4	174262766	174262803	-	22
chr5	72208804	72208844	+	22
chr5	176658807	176658866	+	22
chr7	55210354	55210434	+	22
chr7	107919532	107919555	+	22
chr8	66113405	66113431	+	22
chr9	35657872	35657895	-	22
chr9	115020757	115020892	-	22
chr9	130222717	130222741	+	22
chrM	9127	9179	+	22
chrM	12365	12422	+	22
chrX	65740991	65741043	+	22
chr1	32680189	32680212	-	21
chr1	119914347	119914422	-	21
chr1	183144297	183144326	+	21
chr10	17237429	17237479	+	21
chr10	71816708	71816742	-	21
chr11	35229622	35229712	+	21
chr11	35231916	35231959	+	21
chr12	6731064	6731112	+	21
chr12	48833416	48833453	-	21
chr12	120698298	120698324	+	21
chr13	23574131	23574148	+	21
chr14	22845856	22845886	+	21
chr14	58508611	58508646	+	21
chr14	68789373	68789401	-	21
chr14	101987552	101987630	+	21
chr14	104937905	104937957	-	21
chr15	72199212	72199263	-	21
chr16	70159646	70159678	+	21
chr17	13494126	13494177	-	21
chr17	16027479	16027514	+	21
chr17	50191398	50191451	-	21
chr17	81843695	81843760	-	21
chr18	46088136	46088157	-	21
chr18	59328540	59328565	-	21
chr19	22694890	22694909	-	21
chr19	41352897	41352949	-	21
chr2	26191364	26191392	-	21
chr2	152175689	152175719	-	21
chr2	173222456	173222502	+	21
chr2	205354219	205354237	+	21
chr2	226793902	226793946	-	21
chr22	46686691	46686728	-	21
chr3	52255697	52255726	-	21
chr3	98798087	98798143	-	21
chr3	141447842	141447860	+	21
chr4	102262506	102262566	-	21
chr5	80142187	80142208	-	21
chr6	40396333	40396352	-	21
chr7	55198728	55198756	+	21
chr8	26412598	26412666	+	21
chr9	69718217	69718262	-	21
chr9	131578468	131578493	-	21
chrM	3994	4052	+	21
chrM	7622	7659	+	21
chrX	150768357	150768383	-	21
chrX	154381295	154381365	+	21
chr1	24844073	24844108	+	20
chr1	153534741	153534791	-	20
chr10	125816182	125816220	-	20
chr11	35229944	35229979	+	20
chr11	62521502	62521537	-	20
chr11	69653084	69653150	+	20
chr11	118897187	118897242	-	20
chr12	753875	753921	+	20
chr12	49127816	49127889	-	20
chr12	56596506	56596542	-	20
chr12	112507676	112507703	+	20
chr13	70024122	70024139	-	20
chr13	113503489	113503527	+	20
chr14	69054240	69054295	-	20
chr14	96090773	96090805	+	20
chr14	102983604	102983642	-	20
chr15	55204500	55204537	-	20
chr15	65296040	65296080	+	20
chr15	72210403	72210458	-	20
chr15	78548957	78548985	+	20
chr16	57042249	57042266	+	20
chr16	67198428	67198486	+	20
chr18	9860710	9860737	+	20
chr19	11010501	11010534	+	20
chr2	9414209	9414269	-	20
chr2	54972765	54972813	-	20
chr2	101888808	101888854	+	20
chr2	131048950	131048984	-	20
chr2	215361103	215361143	-	20
chr2	216501461	216501518	+	20
chr21	25881390	25881437	-	20
chr21	46121053	46121087	+	20
chr3	55467336	55467375	-	20
chr3	128070999	128071063	+	20
chr3	157443174	157443201	+	20
chr3	170092576	170092617	-	20
chr4	1340002	1340087	+	20
chr4	39551947	39552006	-	20
chr5	80142216	80142242	-	20
chr5	178895969	178895987	+	20
chr6	75253728	75253754	-	20
chr7	5605842	5605883	+	20
chr7	135929035	135929097	-	20
chr8	11844847	11844904	-	20
chr8	17962106	17962130	+	20
chr8	23302073	23302102	-	20
chr8	38851503	38851561	+	20
chr8	54147681	54147715	+	20
chr8	144785383	144785406	+	20
chr9	89012320	89012339	-	20
chr9	104783703	104783741	-	20
chr1	6591314	6591392	-	19
chr1	8011876	8011962	-	19
chr1	8865391	8865463	-	19
chr1	8878594	8878648	-	19
chr1	20485295	20485344	-	19
chr1	20485369	20485422	-	19
chr1	35184428	35184478	-	19
chr1	39410632	39410659	+	19
chr1	225789407	225789477	+	19
chr1	234606040	234606091	-	19
chr10	1040834	1040874	-	19
chr10	122514451	122514494	+	19
chr11	62530224	62530269	-	19
chr11	118748409	118748469	-	19
chr12	49764799	49764845	+	19
chr14	59504129	59504166	+	19
chr15	31376299	31376320	+	19
chr15	72199585	72199638	-	19
chr16	58521023	58521045	-	19
chr17	81890793	81890826	-	19
chr18	9860685	9860709	+	19
chr19	3976094	3976158	-	19
chr19	10486350	10486437	-	19
chr19	15237731	15237784	-	19
chr2	25975265	25975288	-	19
chr2	65268793	65268830	+	19
chr2	177042407	177042424	-	19
chr2	219289906	219289950	-	19
chr20	3650603	3650644	+	19
chr21	25982446	25982483	-	19
chr21	44849806	44849843	-	19
chr3	45224887	45224957	-	19
chr3	196814504	196814548	+	19
chr4	98471416	98471473	-	19
chr5	132898316	132898341	-	19
chr5	150297079	150297173	-	19
chr5	180791034	180791085	-	19
chr6	146554633	146554686	+	19
chr7	5605955	5605988	+	19
chr7	55470686	55470713	-	19
chr7	73536416	73536446	-	19
chr7	73539998	73540058	-	19
chr7	74195773	74195814	+	19
chr7	128770257	128770330	+	19
chr7	148983743	148983761	+	19
chr7	148987240	148987258	-	19
chr7	155309986	155310024	+	19
chr8	37755645	37755712	+	19
chr8	143991901	143991928	+	19
chr9	34637034	34637068	-	19
chr9	35722168	35722221	-	19
chr9	84003860	84003907	+	19
chr1	26281175	26281287	+	18
chr1	35184352	35184375	-	18
chr1	43170786	43170814	-	18
chr1	70251843	70251885	+	18
chr1	225519196	225519216	-	18
chr1	230280267	230280287	+	18
chr10	17237316	17237375	+	18
chr10	32911990	32912033	-	18
chr11	35229877	35229940	+	18
chr11	35232239	35232278	+	18
chr11	64245250	64245283	-	18
chr11	65500954	65501034	+	18
chr12	2857963	2857991	-	18
chr12	76027415	76027460	-	18
chr12	118033675	118033738	-	18
chr12	123596619	123596682	+	18
chr13	113510261	113510329	+	18
chr14	51254545	51254592	+	18
chr14	54427241	54427276	-	18
chr14	54940737	54940777	-	18
chr14	70031661	70031679	+	18
chr14	76196235	76196273	+	18
chr14	102081455	102081563	-	18
chr16	2762638	2762682	+	18
chr16	21612704	21612740	+	18
chr16	55506132	55506196	+	18
chr17	42522304	42522338	+	18
chr17	56939122	56939154	-	18
chr17	58490889	58490941	-	18
chr17	72125263	72125311	+	18
chr17	82242103	82242146	+	18
chr18	35934105	35934125	-	18
chr18	46088166	46088199	-	18
chr19	1435032	1435059	+	18
chr2	162033616	162033662	-	18
chr2	215361010	215361063	-	18
chr2	215435811	215435859	-	18
chr20	35699423	35699459	+	18
chr21	41993156	41993180	-	18
chr21	43694564	43694623	+	18
chr22	36282223	36282279	-	18
chr3	30693726	30693763	+	18
chr3	55467026	55467063	-	18
chr3	55467479	55467500	-	18
chr3	120328970	120329028	-	18
chr3	156543182	156543217	-	18
chr4	6641963	6642016	+	18
chr4	39107570	39107652	+	18
chr4	75643847	75643876	-	18
chr5	72206335	72206377	+	18
chr5	136028980	136029036	+	18
chr5	138934197	138934224	+	18
chr6	10730858	10730907	+	18
chr6	26056258	26056312	-	18
chr6	26104187	26104247	+	18
chr6	119177432	119177461	-	18
chr7	44828568	44828608	-	18
chr7	94395039	94395070	+	18
chr7	116560307	116560377	+	18
chr7	128848656	128848704	+	18
chr7	135646194	135646214	+	18
chr8	100703139	100703181	-	18
chr9	82031101	82031119	+	18
chr9	101563087	101563110	+	18
chr9	115030248	115030320	-	18
chr9	130233339	130233368	+	18
chrM	3262	3280	+	18
chrM	6462	6501	+	18
chrX	154011619	154011648	-	18
chr1	7965329	7965379	+	17
chr1	28200749	28200788	-	17
chr1	47377542	47377575	+	17
chr1	77632759	77632787	-	17
chr1	144551867	144551889	-	17
chr1	183103375	183103402	+	17
chr1	201820987	201821023	+	17
chr1	206733498	206733521	+	17
chr1	223771801	223771824	+	17
chr1	228494774	228494816	+	17
chr10	17230667	17230711	+	17
chr10	24849070	24849096	-	17
chr10	71821929	71821985	-	17
chr11	57324854	57324874	-	17
chr11	62881250	62881267	+	17
chr11	65888352	65888377	-	17
chr11	69654051	69654097	+	17
chr12	13215488	13215511	+	17
chr12	46183616	46183647	-	17
chr12	56144349	56144433	+	17
chr12	120293229	120293247	-	17
chr12	130876075	130876180	+	17
chr14	22846535	22846577	+	17
chr14	102983650	102983672	-	17
chr14	103522590	103522617	-	17
chr15	70854081	70854123	-	17
chr16	58521198	58521219	-	17
chr16	70159622	70159642	+	17
chr17	16441632	16441682	+	17
chr17	45106829	45106872	+	17
chr17	47673026	47673087	+	17
chr17	50088268	50088310	+	17
chr17	50194161	50194195	-	17
chr17	81241020	81241072	+	17
chr17	82239856	82239914	+	17
chr19	38931275	38931295	+	17
chr19	53875789	53875817	+	17
chr2	210433779	210433815	-	17
chr2	215334958	215334980	+	17
chr2	218595360	218595380	+	17
chr2	241353898	241353920	+	17
chr20	995443	995467	-	17
chr20	45426068	45426088	+	17
chr22	20951102	20951131	+	17
chr22	42070326	42070353	-	17
chr3	10126766	10126812	+	17
chr4	118757762	118757848	-	17
chr5	38881703	38881744	+	17
chr5	78476633	78476668	+	17
chr5	151662753	151662826	-	17
chr5	151663165	151663191	-	17
chr6	85467196	85467237	+	17
chr6	159681309	159681397	-	17
chr7	74121899	74121919	+	17
chr8	47904899	47904926	-	17
chrM	6899	6935	+	17
chrM	11819	11916	+	17
chrM	14136	14183	-	17
chrX	110195671	110195721	-	17
chr1	6591956	6592001	-	16
chr1	12002015	12002037	+	16
chr1	153535238	153535267	-	16
chr10	17229707	17229738	+	16
chr10	24630023	24630049	-	16
chr10	28620115	28620147	+	16
chr10	71816572	71816652	-	16
chr10	131967881	131967909	-	16
chr11	69643942	69643987	+	16
chr11	69652060	69652095	+	16
chr12	1494020	1494055	+	16
chr12	6731120	6731184	+	16
chr12	6866470	6866540	+	16
chr12	57211292	57211330	+	16
chr12	64713662	64713693	-	16
chr12	112508980	112509026	+	16
chr12	120198598	120198636	-	16
chr12	120293147	120293178	-	16
chr13	98021887	98021908	+	16
chr14	102027626	102027668	+	16
chr15	48613013	48613095	-	16
chr15	58595740	58595779	-	16
chr16	681272	681292	+	16
chr16	1701014	1701042	+	16
chr16	57119545	57119588	+	16
chr16	58629773	58629806	-	16
chr16	67438306	67438325	-	16
chr17	35724390	35724413	+	16
chr17	38920003	38920064	+	16
chr17	39995419	39995455	+	16
chr17	42402772	42402823	-	16
chr17	50072048	50072075	+	16
chr17	50201608	50201642	-	16
chr17	75033928	75033946	+	16
chr19	7963339	7963395	-	16
chr2	38984930	38984954	-	16
chr2	46356782	46356807	+	16
chr2	54982550	54982607	-	16
chr2	86504662	86504686	-	16
chr2	172597279	172597313	+	16
chr2	231172589	231172641	+	16
chr20	38090215	38090251	+	16
chr21	8210733	8210769	+	16
chr21	25880959	25881018	-	16
chr21	33552874	33552908	+	16
chr21	37165788	37165819	+	16
chr21	46120548	46120580	+	16
chr3	48468132	48468165	-	16
chr3	50289279	50289331	-	16
chr3	50648330	50648384	+	16
chr3	98797140	98797235	-	16
chr3	98901557	98901622	-	16
chr4	1953316	1953371	+	16
chr4	1975332	1975377	+	16
chr4	75645092	75645125	-	16
chr4	77058504	77058595	-	16
chr4	169721883	169721907	+	16
chr5	1470872	1470904	-	16
chr5	72206301	72206334	+	16
chr5	80139737	80139785	-	16
chr5	181188480	181188498	-	16
chr6	7289325	7289360	-	16
chr6	18225589	18225639	-	16
chr6	44251066	44251100	+	16
chr6	73827982	73828009	+	16
chr6	149789942	149789987	+	16
chr7	94410461	94410494	+	16
chr7	94411098	94411122	+	16
chr7	101138854	101138897	+	16
chr7	128771003	128771078	+	16
chr7	157178764	157178804	+	16
chr9	34589038	34589056	-	16
chr9	130701729	130701751	+	16
chrM	9715	9804	+	16
chrM	10574	10618	+	16
chrM	11111	11143	+	16
chrX	24054952	24054980	+	16
chr1	19304141	19304176	-	15
chr1	77161320	77161339	-	15
chr1	114706392	114706419	-	15
chr1	150577115	150577185	-	15
chr1	156263470	156263526	-	15
chr1	156742203	156742271	-	15
chr1	179072182	179072223	+	15
chr1	179844793	179844815	-	15
chr1	206734090	206734113	+	15
chr1	234606590	234606634	-	15
chr10	100150739	100150802	-	15
chr10	102107375	102107412	-	15
chr11	10803231	10803249	-	15
chr11	18405456	18405500	+	15
chr11	34096577	34096611	+	15
chr11	35229803	35229863	+	15
chr11	35230713	35230735	+	15
chr11	62598077	62598136	-	15
chr11	65499574	65499642	+	15
chr11	68613721	68613780	+	15
chr12	2803620	2803694	+	15
chr12	49272981	49273033	+	15
chr12	56239304	56239357	-	15
chr12	57210861	57210885	+	15
chr14	49895688	49895740	+	15
chr14	54475001	54475055	-	15
chr14	73712961	73713009	-	15
chr14	92142259	92142289	+	15
chr15	43528430	43528493	+	15
chr15	49126657	49126684	-	15
chr16	55483011	55483064	+	15
chr16	55505704	55505791	+	15
chr17	516802	516835	-	15
chr17	4948546	4948573	-	15
chr17	7461182	7461217	-	15
chr17	17820225	17820284	-	15
chr17	42403000	42403079	-	15
chr17	42797822	42797904	-	15
chr17	43015045	43015069	-	15
chr17	47684294	47684330	+	15
chr17	50189433	50189507	-	15
chr17	50195056	50195112	-	15
chr17	81868171	81868211	-	15
chr17	81868477	81868506	-	15
chr19	10133550	10133580	-	15
chr19	34428369	34428414	+	15
chr19	34428417	34428457	+	15
chr19	48966323	48966392	+	15
chr19	55117288	55117344	-	15
chr2	10448281	10448322	-	15
chr2	26191483	26191528	-	15
chr2	32499945	32500021	+	15
chr2	54973002	54973057	-	15
chr2	97646069	97646122	+	15
chr2	157736944	157736969	-	15
chr2	214962086	214962106	+	15
chr2	223975216	223975258	-	15
chr2	241353850	241353885	+	15
chr20	31801665	31801720	+	15
chr20	35699612	35699669	+	15
chr20	35949458	35949488	+	15
chr20	44511305	44511326	-	15
chr20	44907392	44907418	+	15
chr21	14373700	14373729	-	15
chr21	33549919	33549960	+	15
chr21	37202727	37202762	+	15
chr21	44850769	44850799	-	15
chr3	9789568	9789587	-	15
chr3	52533591	52533610	-	15
chr3	52533713	52533783	-	15
chr3	57556370	57556405	+	15
chr3	123613857	123613891	-	15
chr3	127691191	127691209	-	15
chr4	1955705	1955740	+	15
chr5	5461216	5461243	+	15
chr5	17275960	17276019	+	15
chr5	179730353	179730372	+	15
chr6	31862157	31862207	-	15
chr6	34590023	34590079	-	15
chr6	52277554	52277577	-	15
chr7	74083817	74083854	+	15
chr7	101138045	101138095	+	15
chr7	101138135	101138205	+	15
chr7	107919557	107919613	+	15
chr7	128748711	128748739	+	15
chr7	130497130	130497211	+	15
chr8	30799708	30799742	-	15
chr8	42546518	42546549	+	15
chr8	143915477	143915538	-	15
chr8	144791427	144791504	-	15
chr9	6506738	6506771	+	15
chr9	35657901	35657919	-	15
chrM	13146	13173	+	15
chrX	71301057	71301124	+	15
chrX	154365194	154365247	-	15
chr1	1786203	1786235	-	14
chr1	20483372	20483417	-	14
chr1	24842570	24842609	+	14
chr1	45515758	45515792	-	14
chr1	54850906	54850980	-	14
chr1	117496845	117496879	+	14
chr1	183143348	183143384	+	14
chr10	71816789	71816843	-	14
chr10	95606199	95606216	-	14
chr10	96551265	96551307	-	14
chr10	126017024	126017053	-	14
chr11	18403674	18403734	+	14
chr11	35229768	35229791	+	14
chr11	35231572	35231610	+	14
chr11	62518304	62518351	-	14
chr11	65892816	65892858	-	14
chr11	69652532	69652572	+	14
chr12	6536667	6536715	+	14
chr12	6941508	6941539	+	14
chr12	49127943	49128000	-	14
chr12	54395353	54395393	-	14
chr12	57196190	57196220	+	14
chr12	89349499	89349536	-	14
chr12	111447512	111447545	+	14
chr12	112509083	112509125	+	14
chr12	120212180	120212225	-	14
chr14	55684243	55684257	+	14
chr14	72977959	72977977	-	14
chr14	74500094	74500136	-	14
chr14	92142220	92142258	+	14
chr14	105011081	105011108	-	14
chr15	72200542	72200574	-	14
chr16	4316399	4316419	+	14
chr16	14668451	14668479	+	14
chr16	28211424	28211447	-	14
chr16	71928341	71928385	+	14
chr17	4945708	4945750	-	14
chr17	7312149	7312200	+	14
chr17	7514453	7514474	+	14
chr17	35724697	35724742	+	14
chr17	50194130	50194159	-	14
chr17	76680689	76680719	-	14
chr17	78223899	78223928	+	14
chr17	81843845	81843890	-	14
chr17	81868231	81868288	-	14
chr18	56753253	56753286	-	14
chr19	3468436	3468475	+	14
chr19	11359545	11359568	+	14
chr2	20254904	20254951	-	14
chr2	25743810	25743847	-	14
chr2	27041466	27041528	+	14
chr2	61499847	61499901	-	14
chr2	182978852	182978921	-	14
chr2	215334917	215334954	+	14
chr2	215386781	215386827	-	14
chr2	216268236	216268253	-	14
chr2	216498835	216498864	+	14
chr2	230878652	230878683	+	14
chr2	231459046	231459080	-	14
chr2	241248048	241248113	-	14
chr20	47655617	47655644	+	14
chr20	59038497	59038532	-	14
chr22	38819691	38819717	-	14
chr3	49015864	49015927	+	14
chr3	50258456	50258491	+	14
chr3	98797642	98797678	-	14
chr3	101822110	101822141	+	14
chr3	130932038	130932098	+	14
chr3	170096561	170096595	-	14
chr3	170097352	170097380	-	14
chr3	170102479	170102513	-	14
chr3	181822961	181823001	-	14
chr4	1871397	1871435	+	14
chr4	39288074	39288115	-	14
chr5	5461267	5461286	+	14
chr5	69175390	69175435	+	14
chr5	122065130	122065208	-	14
chr5	134605989	134606033	-	14
chr5	176508777	176508827	+	14
chr6	35468700	35468745	+	14
chr6	109368160	109368191	-	14
chr6	149410556	149410622	+	14
chr6	151305746	151305786	+	14
chr7	50590827	50590888	-	14
chr7	74084019	74084040	+	14
chr7	94394884	94394933	+	14
chr7	112405029	112405047	-	14
chr7	128770664	128770740	+	14
chr7	128843262	128843296	+	14
chr7	139566546	139566577	-	14
chr7	152179851	152179872	-	14
chr8	23842141	23842177	-	14
chr8	42861770	42861791	-	14
chr8	43127799	43127825	+	14
chr9	35057038	35057069	-	14
chr9	98015703	98015735	+	14
chr9	127505998	127506042	-	14
chr9	136477316	136477361	-	14
chrM	8152	8209	+	14
chrM	10255	10346	+	14
chrM	14024	14053	+	14
chrM	15765	15846	+	14
chrX	16736210	16736229	+	14
chrX	20156230	20156257	-	14
chrX	103330266	103330296	+	14
chrX	154352284	154352333	-	14
chrX	154353115	154353161	-	14
chr1	11975286	11975330	+	13
chr1	24841419	24841456	+	13
chr1	33324182	33324230	-	13
chr1	43360374	43360394	+	13
chr1	54216272	54216306	+	13
chr1	67704123	67704146	-	13
chr1	111461013	111461066	+	13
chr1	112701657	112701704	-	13
chr1	119929139	119929183	-	13
chr1	119940736	119940762	-	13
chr1	150220554	150220590	-	13
chr1	151983170	151983191	-	13
chr1	156464664	156464691	-	13
chr1	183103355	183103374	+	13
chr1	223770486	223770526	+	13
chr10	17233585	17233606	+	13
chr10	101005589	101005606	+	13
chr11	35230383	35230402	+	13
chr11	62853385	62853403	-	13
chr11	65504110	65504165	+	13
chr11	65505593	65505635	+	13
chr11	65855145	65855180	-	13
chr11	66276743	66276774	+	13
chr11	69654151	69654199	+	13
chr11	119055179	119055220	-	13
chr12	8053153	8053175	+	13
chr12	8941620	8941639	-	13
chr12	13215583	13215616	+	13
chr12	49128812	49128839	-	13
chr12	56144452	56144497	+	13
chr12	57194988	57195011	+	13
chr13	36828089	36828137	+	13
chr14	55671775	55671805	+	13
chr14	55673239	55673258	+	13
chr14	69767134	69767155	+	13
chr14	96565197	96565243	+	13
chr14	104940806	104940843	-	13
chr15	28213838	28213858	-	13
chr15	44524281	44524301	+	13
chr15	72199701	72199746	-	13
chr15	89195890	89195912	+	13
chr16	3191511	3191543	+	13
chr16	19504926	19504945	-	13
chr16	28177278	28177311	-	13
chr17	7514397	7514442	+	13
chr17	18208617	18208672	+	13
chr17	35724744	35724804	+	13
chr17	38503959	38503977	+	13
chr17	40389119	40389163	-	13
chr17	42841702	42841732	+	13
chr17	48928085	48928125	+	13
chr17	58491196	58491230	-	13
chr18	8113482	8113503	+	13
chr18	21869151	21869200	+	13
chr19	810928	810981	+	13
chr19	6418539	6418561	-	13
chr19	16101569	16101628	+	13
chr19	39435923	39435958	-	13
chr19	47002943	47002993	+	13
chr19	49799666	49799686	+	13
chr2	54456442	54456470	+	13
chr2	69465029	69465081	-	13
chr2	70277935	70277956	+	13
chr2	72131823	72131847	-	13
chr2	105893534	105893595	+	13
chr2	152637615	152637660	+	13
chr2	200829998	200830041	+	13
chr2	215384909	215384932	-	13
chr2	215428199	215428265	-	13
chr2	216501332	216501379	+	13
chr2	237324458	237324507	-	13
chr2	237374996	237375029	-	13
chr20	36048809	36048862	-	13
chr21	18353796	18353831	-	13
chr22	35393616	35393691	+	13
chr3	31623772	31623816	+	13
chr3	51394255	51394302	+	13
chr3	51674453	51674481	+	13
chr3	98798519	98798588	-	13
chr3	98798919	98798966	-	13
chr3	152464879	152464899	+	13
chr3	156542885	156542910	-	13
chr3	170866487	170866508	-	13
chr3	179234112	179234139	+	13
chr4	52028801	52028828	-	13
chr4	140553090	140553157	+	13
chr5	5461287	5461310	+	13
chr5	154814188	154814226	+	13
chr5	154902550	154902569	-	13
chr5	180791346	180791398	-	13
chr6	30725201	30725222	+	13
chr6	43770870	43770898	+	13
chr6	56594037	56594059	-	13
chr6	56601517	56601537	-	13
chr6	106553516	106553565	+	13
chr6	133476096	133476117	+	13
chr6	158632669	158632712	+	13
chr7	55208894	55208931	+	13
chr7	100688590	100688618	-	13
chr7	101160889	101160949	+	13
chr7	106091134	106091180	-	13
chr7	137875865	137875911	-	13
chr7	157256922	157256949	+	13
chr8	8783853	8783898	-	13
chr8	23566635	23566656	+	13
chr8	143915541	143915590	-	13
chr8	145054433	145054498	+	13
chr9	128694743	128694790	+	13
chrM	6523	6565	+	13
chrM	7790	7817	+	13
chrM	9871	9897	+	13
chrX	151407270	151407293	+	13
chrX	154018306	154018345	-	13
chrX	154349732	154349761	-	13
chr1	8874858	8874908	-	12
chr1	20485425	20485470	-	12
chr1	26281084	26281166	+	12
chr1	32775339	32775390	-	12
chr1	51399025	51399059	-	12
chr1	53766426	53766482	-	12
chr1	54031954	54031979	-	12
chr1	77759581	77759598	-	12
chr1	109317950	109317976	-	12
chr1	116388127	116388169	+	12
chr1	154207461	154207500	-	12
chr1	160996292	160996330	-	12
chr1	186406142	186406211	+	12
chr1	208028007	208028028	-	12
chr10	33179776	33179826	-	12
chr10	73249632	73249650	-	12
chr10	101785964	101786004	-	12
chr10	102163763	102163795	+	12
chr10	122514804	122514824	+	12
chr10	133262927	133262960	-	12
chr11	6641877	6641894	+	12
chr11	8982026	8982073	-	12
chr11	20118952	20118980	+	12
chr11	35230411	35230445	+	12
chr11	57317842	57317872	-	12
chr11	61789812	61789849	-	12
chr11	62629230	62629254	-	12
chr11	65546817	65546848	-	12
chr11	65647428	65647458	+	12
chr11	68033170	68033203	+	12
chr11	123059121	123059179	-	12
chr12	6870052	6870079	+	12
chr12	19473305	19473330	+	12
chr12	49131294	49131355	-	12
chr12	49762912	49762943	+	12
chr12	55727309	55727348	-	12
chr12	56210499	56210540	-	12
chr12	56664115	56664164	-	12
chr12	56713637	56713689	-	12
chr12	120199389	120199431	-	12
chr12	120694220	120694253	+	12
chr12	120697577	120697602	+	12
chr12	123261536	123261577	-	12
chr12	123758826	123758859	+	12
chr13	48261566	48261601	+	12
chr14	52671633	52671652	-	12
chr15	55848816	55848837	-	12
chr15	69455189	69455217	+	12
chr15	69455228	69455263	+	12
chr15	72209734	72209783	-	12
chr16	54283450	54283475	-	12
chr16	55485640	55485712	+	12
chr16	57447516	57447558	+	12
chr17	1897448	1897486	+	12
chr17	4980235	4980288	-	12
chr17	17188159	17188212	+	12
chr17	42402642	42402670	-	12
chr17	42402978	42402997	-	12
chr17	44075358	44075401	+	12
chr17	54962753	54962787	-	12
chr17	81510705	81510747	-	12
chr17	81868390	81868437	-	12
chr18	9954154	9954176	+	12
chr18	31830402	31830437	-	12
chr18	51078697	51078721	+	12
chr19	13095288	13095326	+	12
chr2	33397161	33397185	+	12
chr2	61031528	61031546	+	12
chr2	118108767	118108795	+	12
chr2	132255661	132255680	-	12
chr2	149023913	149023958	+	12
chr2	230878327	230878350	+	12
chr2	237324095	237324136	-	12
chr20	14966103	14966120	+	12
chr20	63933077	63933098	+	12
chr21	33553196	33553241	+	12
chr21	33553284	33553331	+	12
chr21	41885199	41885240	-	12
chr21	41885293	41885334	-	12
chr22	36281850	36281875	-	12
chr22	38828386	38828418	-	12
chr22	40330412	40330433	+	12
chr22	41434607	41434655	-	12
chr22	42871232	42871264	-	12
chr3	9785406	9785428	-	12
chr3	27409389	27409435	-	12
chr3	39411938	39411972	+	12
chr3	45224831	45224869	-	12
chr3	58130817	58130848	+	12
chr3	98822727	98822747	-	12
chr3	98901520	98901551	-	12
chr3	113721331	113721369	-	12
chr3	120688436	120688458	-	12
chr3	123752366	123752402	-	12
chr3	127691275	127691306	-	12
chr3	133589682	133589701	+	12
chr3	156542911	156542947	-	12
chr3	170092530	170092571	-	12
chr4	8866718	8866736	-	12
chr4	158667046	158667081	-	12
chr4	165342821	165342859	+	12
chr5	10436686	10436713	+	12
chr5	38502637	38502665	-	12
chr5	74636085	74636107	-	12
chr5	113024142	113024160	-	12
chr5	150795993	150796029	+	12
chr5	172952181	172952247	+	12
chr5	177595766	177595797	+	12
chr5	181242203	181242249	-	12
chr6	31821808	31821835	-	12
chr6	52277532	52277551	-	12
chr6	149773143	149773170	+	12
chr6	163568063	163568095	+	12
chr7	2730147	2730170	-	12
chr7	5605886	5605918	+	12
chr7	76327990	76328032	-	12
chr7	94664060	94664113	+	12
chr7	98291369	98291416	+	12
chr7	101138214	101138254	+	12
chr7	139571197	139571216	-	12
chr7	151378032	151378082	+	12
chr8	27735952	27735995	-	12
chr8	28347021	28347063	-	12
chr8	28751638	28751677	+	12
chr8	81658399	81658430	-	12
chr8	116847244	116847274	-	12
chr9	19378461	19378512	-	12
chr9	35717666	35717701	-	12
chr9	35717745	35717786	-	12
chr9	36191007	36191041	+	12
chr9	37867442	37867459	+	12
chr9	73170227	73170276	+	12
chr9	100240213	100240241	+	12
chr9	109016058	109016085	-	12
chr9	109020453	109020508	-	12
chr9	114598217	114598265	+	12
chr9	115086005	115086054	-	12
chrM	9486	9523	+	12
chrM	9917	9981	+	12
chrM	10514	10557	+	12
chrM	15181	15219	+	12
chrX	72064540	72064559	+	12
chrX	109642711	109642749	-	12
chrX	153958001	153958044	-	12
chrX	154011163	154011208	-	12
chrX	154361735	154361780	-	12
chr1	6592429	6592449	-	11
chr1	8861244	8861277	-	11
chr1	40464964	40464989	+	11
chr1	43981244	43981264	+	11
chr1	46696562	46696610	-	11
chr1	58781550	58781600	-	11
chr1	109311078	109311106	-	11
chr1	110343709	110343764	+	11
chr1	173866019	173866037	-	11
chr1	228098365	228098410	+	11
chr10	12035429	12035448	-	11
chr10	29421524	29421557	+	11
chr10	35569267	35569292	+	11
chr10	77637367	77637402	-	11
chr10	77637466	77637511	-	11
chr10	102657644	102657682	+	11
chr10	110511048	110511083	+	11
chr11	13732198	13732220	+	11
chr11	18407627	18407660	+	11
chr11	35230210	35230249	+	11
chr11	62525527	62525553	-	11
chr11	62536035	62536067	-	11
chr11	64245215	64245235	-	11
chr11	65855975	65856022	-	11
chr11	65888096	65888138	-	11
chr11	65892491	65892564	-	11
chr11	69652925	69652952	+	11
chr11	76351754	76351788	-	11
chr11	123083819	123083860	-	11
chr12	13214690	13214719	+	11
chr12	24878527	24878560	-	11
chr12	26965320	26965343	+	11
chr12	46183675	46183714	-	11
chr12	54237237	54237262	-	11
chr12	56161488	56161508	+	11
chr12	56638286	56638323	-	11
chr12	57179432	57179453	+	11
chr12	57205415	57205450	+	11
chr12	118033748	118033797	-	11
chr12	120199182	120199210	-	11
chr14	81473626	81473660	-	11
chr14	96565459	96565494	+	11
chr14	104755712	104755745	+	11
chr14	105479720	105479745	+	11
chr15	42416325	42416346	-	11
chr15	48441743	48441763	-	11
chr15	66502661	66502690	-	11
chr15	70854144	70854167	-	11
chr15	74410031	74410066	-	11
chr15	89199068	89199129	+	11
chr16	3021628	3021667	+	11
chr16	88715557	88715585	-	11
chr16	88720184	88720213	-	11
chr17	1684857	1684877	-	11
chr17	16439678	16439703	+	11
chr17	17173985	17174024	+	11
chr17	21002548	21002586	-	11
chr17	39995462	39995504	+	11
chr17	42314314	42314345	-	11
chr17	42404471	42404492	-	11
chr17	50076318	50076349	+	11
chr17	50189861	50189913	-	11
chr17	78370973	78370992	-	11
chr17	81512729	81512756	-	11
chr17	81843767	81843816	-	11
chr17	81843911	81843972	-	11
chr17	82083813	82083840	-	11
chr18	12325898	12325948	+	11
chr18	21869071	21869107	+	11
chr18	68675317	68675383	-	11
chr18	74520235	74520257	+	11
chr19	2101653	2101672	-	11
chr19	7963278	7963314	-	11
chr19	19356010	19356034	+	11
chr19	21821356	21821374	-	11
chr19	41261108	41261150	+	11
chr19	46920633	46920664	+	11
chr19	48873568	48873598	+	11
chr19	55692957	55692975	+	11
chr19	58388179	58388245	+	11
chr2	10445241	10445273	-	11
chr2	20204164	20204203	-	11
chr2	20254881	20254903	-	11
chr2	36555706	36555728	-	11
chr2	101829544	101829597	+	11
chr2	101893185	101893211	+	11
chr2	108686645	108686688	+	11
chr2	112116543	112116564	+	11
chr2	152148097	152148128	-	11
chr2	187464916	187464970	-	11
chr2	215430793	215430852	-	11
chr2	215431828	215431857	-	11
chr2	218595279	218595298	+	11
chr2	223998282	223998299	-	11
chr2	229764590	229764628	-	11
chr20	33408058	33408113	-	11
chr20	43709990	43710053	+	11
chr20	48951397	48951431	+	11
chr21	8397622	8397644	+	11
chr21	25911814	25911869	-	11
chr22	36281965	36282019	-	11
chr22	36282570	36282636	-	11
chr22	38821850	38821896	-	11
chr22	41245950	41245985	-	11
chr22	41339945	41339968	+	11
chr22	41866834	41866865	+	11
chr22	44246509	44246555	-	11
chr3	30692837	30692854	+	11
chr3	41239989	41240033	+	11
chr3	45224626	45224644	-	11
chr3	45547978	45548032	+	11
chr3	52525206	52525229	-	11
chr3	52528028	52528047	-	11
chr3	57270073	57270100	+	11
chr3	57628148	57628181	-	11
chr3	58171874	58171937	+	11
chr3	81642948	81642973	-	11
chr3	98797480	98797521	-	11
chr3	98798211	98798249	-	11
chr3	98798417	98798477	-	11
chr3	120338942	120338959	-	11
chr3	123492068	123492095	-	11
chr3	161250962	161250999	+	11
chr3	169982705	169982736	+	11
chr3	170091114	170091139	-	11
chr3	179784572	179784597	+	11
chr3	185923970	185923988	-	11
chr3	185925484	185925527	-	11
chr3	196051679	196051725	-	11
chr4	67617002	67617024	-	11
chr4	75643817	75643843	-	11
chr5	72197269	72197299	+	11
chr5	122065081	122065124	-	11
chr5	151805556	151805598	+	11
chr5	154460588	154460628	+	11
chr5	179728989	179729036	+	11
chr5	179836731	179836797	+	11
chr6	56465271	56465300	-	11
chr6	122211637	122211654	+	11
chr6	134133766	134133795	+	11
chr6	158192279	158192319	+	11
chr6	158789356	158789373	-	11
chr7	260108	260135	+	11
chr7	1470412	1470430	-	11
chr7	2730463	2730481	-	11
chr7	5606154	5606196	+	11
chr7	55151296	55151337	+	11
chr7	92398969	92398989	+	11
chr7	94666778	94666806	+	11
chr7	101137792	101137839	+	11
chr7	101161128	101161160	+	11
chr7	116797622	116797697	+	11
chr7	128858849	128858878	+	11
chr8	18531768	18531794	-	11
chr8	18789353	18789390	-	11
chr8	23842460	23842498	-	11
chr8	26411652	26411738	+	11
chr8	37757240	37757281	+	11
chr8	47943983	47944010	-	11
chr8	61625018	61625062	-	11
chr8	90002211	90002228	-	11
chr9	33047046	33047071	-	11
chr9	35056978	35057011	-	11
chr9	112262534	112262571	-	11
chr9	127505787	127505875	-	11
chr9	130232981	130233014	+	11
chr9	132269267	132269295	-	11
chr9	133362809	133362849	-	11
chr9	136440766	136440823	-	11
chrM	7229	7252	+	11
chrM	7827	7878	+	11
chrM	15056	15102	+	11
chrX	12977019	12977059	+	11
chrX	20153243	20153296	-	11
chrX	65741232	65741266	+	11
chrX	154010592	154010626	-	11
chr1	1786168	1786190	-	10
chr1	1786528	1786578	-	10
chr1	2404187	2404224	+	10
chr1	11750440	11750470	+	10
chr1	20485658	20485686	-	10
chr1	25900263	25900291	-	10
chr1	33009530	33009549	-	10
chr1	39442858	39442875	+	10
chr1	51973399	51973437	+	10
chr1	70251901	70251925	+	10
chr1	112913609	112913672	-	10
chr1	114706139	114706174	-	10
chr1	151983138	151983166	-	10
chr1	158098601	158098640	+	10
chr1	162528603	162528629	+	10
chr1	166854380	166854399	+	10
chr1	203870002	203870029	+	10
chr1	220137910	220137950	+	10
chr1	223775597	223775627	+	10
chr1	227199558	227199613	-	10
chr1	229323429	229323454	-	10
chr10	276215	276241	-	10
chr10	68721383	68721400	+	10
chr10	96521443	96521492	-	10
chr10	96528042	96528068	-	10
chr10	122461712	122461772	+	10
chr11	1275219	1275256	-	10
chr11	18407155	18407212	+	10
chr11	34096537	34096572	+	10
chr11	35189972	35190005	+	10
chr11	43344010	43344028	+	10
chr11	59551744	59551761	+	10
chr11	62516458	62516506	-	10
chr11	62529296	62529339	-	10
chr11	62530150	62530194	-	10
chr11	63628807	63628845	-	10
chr11	65500099	65500176	+	10
chr11	65500698	65500720	+	10
chr11	65546547	65546566	-	10
chr11	65896801	65896821	-	10
chr11	69651969	69652021	+	10
chr11	69652382	69652429	+	10
chr12	15882402	15882438	+	10
chr12	22686900	22686925	+	10
chr12	30653064	30653087	-	10
chr12	49128856	49128877	-	10
chr12	53467802	53467845	+	10
chr12	55993895	55993928	+	10
chr12	57211184	57211241	+	10
chr12	96979549	96979578	-	10
chr12	112507710	112507736	+	10
chr12	123261677	123261710	-	10
chr12	123597675	123597735	+	10
chr12	123758872	123758907	+	10
chr13	76884980	76885009	-	10
chr14	21210202	21210227	-	10
chr14	22846609	22846660	+	10
chr14	51254704	51254753	+	10
chr14	58234368	58234403	+	10
chr14	60283489	60283518	+	10
chr14	75745508	75745530	+	10
chr14	93293988	93294010	-	10
chr14	100278056	100278117	+	10
chr14	101980462	101980505	+	10
chr14	102004758	102004777	+	10
chr14	102081153	102081203	-	10
chr14	102081372	102081418	-	10
chr14	102949804	102949837	-	10
chr15	43521821	43521863	+	10
chr15	43528290	43528326	+	10
chr15	43771348	43771382	+	10
chr15	43793891	43793943	+	10
chr15	60351723	60351768	-	10
chr15	60351774	60351798	-	10
chr15	65304668	65304710	+	10
chr15	68779068	68779100	-	10
chr15	72207141	72207169	-	10
chr15	72218971	72219003	-	10
chr15	72231136	72231194	-	10
chr15	74034476	74034495	+	10
chr15	89199651	89199695	+	10
chr15	90953755	90953790	+	10
chr16	3021585	3021616	+	10
chr16	3191979	3192031	+	10
chr16	19647792	19647828	+	10
chr16	23690246	23690294	+	10
chr16	31112145	31112172	+	10
chr16	31807075	31807104	+	10
chr16	55485304	55485353	+	10
chr16	58162448	58162476	-	10
chr16	58541593	58541628	-	10
chr16	69741938	69741997	-	10
chr16	74296883	74296925	+	10
chr16	84662357	84662384	+	10
chr17	4675109	4675154	-	10
chr17	7311817	7311855	+	10
chr17	17158577	17158618	+	10
chr17	17188118	17188152	+	10
chr17	32481137	32481192	+	10
chr17	41689903	41689923	+	10
chr17	42404437	42404466	-	10
chr17	42842027	42842051	+	10
chr17	43211151	43211188	+	10
chr17	44932155	44932183	-	10
chr17	50194430	50194457	-	10
chr17	59647545	59647618	+	10
chr17	67743930	67743981	+	10
chr17	74203666	74203712	+	10
chr17	81511264	81511325	-	10
chr17	81512225	81512270	-	10
chr17	81845634	81845688	-	10
chr17	81868707	81868751	-	10
chr18	8638553	8638578	+	10
chr19	580678	580733	+	10
chr19	2233229	2233253	-	10
chr19	2434038	2434074	-	10
chr19	3978049	3978083	-	10
chr19	3983171	3983212	-	10
chr19	4657681	4657741	-	10
chr19	4794977	4795006	+	10
chr19	8403846	8403886	+	10
chr19	11133274	11133299	+	10
chr19	17322275	17322331	+	10
chr19	38730227	38730253	+	10
chr19	41238007	41238041	+	10
chr19	41260088	41260117	+	10
chr19	41260730	41260775	+	10
chr19	48966655	48966677	+	10
chr2	9207191	9207217	+	10
chr2	46902690	46902731	-	10
chr2	54972616	54972673	-	10
chr2	58163440	58163468	-	10
chr2	61886484	61886504	-	10
chr2	65269296	65269330	+	10
chr2	108685697	108685736	+	10
chr2	131049016	131049060	-	10
chr2	178513498	178513516	+	10
chr2	215408295	215408378	-	10
chr2	218274526	218274562	-	10
chr2	229358149	229358190	-	10
chr2	230819037	230819080	+	10
chr2	237334761	237334795	-	10
chr2	237339063	237339111	-	10
chr2	237353337	237353377	-	10
chr20	36779912	36779932	-	10
chr20	43713014	43713056	+	10
chr20	44906761	44906798	+	10
chr20	45078568	45078596	+	10
chr20	58360305	58360335	+	10
chr20	62134852	62134894	+	10
chr20	62947568	62947586	+	10
chr21	32630617	32630640	-	10
chr21	36489441	36489480	+	10
chr21	46004558	46004611	+	10
chr22	36282168	36282191	-	10
chr22	38483676	38483732	-	10
chr3	14945106	14945144	-	10
chr3	30692480	30692535	+	10
chr3	33084650	33084673	-	10
chr3	39408614	39408654	+	10
chr3	45677520	45677555	+	10
chr3	45677580	45677608	+	10
chr3	98796130	98796166	-	10
chr3	98901419	98901445	-	10
chr3	128055674	128055705	+	10
chr3	136521296	136521353	-	10
chr3	146110290	146110336	-	10
chr3	182919834	182919870	+	10
chr3	184302368	184302423	+	10
chr3	184335026	184335052	+	10
chr4	1727736	1727816	+	10
chr4	10083028	10083066	-	10
chr4	24527605	24527662	-	10
chr4	77034931	77034993	+	10
chr4	80201321	80201349	+	10
chr4	83536613	83536660	+	10
chr5	72198496	72198538	+	10
chr5	72208343	72208403	+	10
chr5	91376700	91376760	-	10
chr5	103003044	103003078	+	10
chr5	112876701	112876734	-	10
chr5	149984927	149984969	+	10
chr5	154815544	154815583	+	10
chr5	177515178	177515211	-	10
chr5	177595582	177595611	+	10
chr5	179729066	179729103	+	10
chr5	179837103	179837143	+	10
chr6	31631251	31631291	+	10
chr6	32853595	32853641	-	10
chr6	33305170	33305221	-	10
chr6	146544072	146544124	+	10
chr6	146604204	146604241	+	10
chr7	2380664	2380707	+	10
chr7	45913281	45913315	-	10
chr7	73441083	73441105	-	10
chr7	73536396	73536415	-	10
chr7	73536491	73536544	-	10
chr7	74121830	74121858	+	10
chr7	94422954	94423024	+	10
chr7	101138282	101138325	+	10
chr7	116797570	116797621	+	10
chr7	116918456	116918489	+	10
chr7	121349675	121349701	-	10
chr7	135927265	135927316	-	10
chr7	139566251	139566306	-	10
chr7	141743637	141743691	+	10
chr7	148963304	148963336	+	10
chr7	152177999	152178018	-	10
chr8	6758538	6758579	+	10
chr8	17962140	17962167	+	10
chr8	23842383	23842427	-	10
chr8	27604380	27604408	-	10
chr8	30607077	30607105	-	10
chr8	30785828	30785864	-	10
chr8	52673872	52673913	-	10
chr8	100919508	100919553	-	10
chr8	143934819	143934850	-	10
chr9	89012350	89012401	-	10
chr9	91409196	91409237	-	10
chr9	92210497	92210524	-	10
chr9	104783758	104783827	-	10
chr9	110170782	110170837	+	10
chr9	127506251	127506282	-	10
chr9	128689493	128689535	+	10
chrM	8116	8147	+	10
chrM	9211	9252	+	10
chrM	10954	10984	+	10
chrM	14999	15041	+	10
chrX	65740221	65740260	+	10
chrX	103331793	103331810	+	10
chrX	104120795	104120815	-	10
chrX	153666388	153666419	+	10
chrX	154353070	154353109	-	10
chrX	154355038	154355060	-	10
chrX	154360355	154360405	-	10
chrX	154449365	154449383	+	10
chr1	1785693	1785747	-	9
chr1	1786279	1786297	-	9
chr1	2403186	2403215	+	9
chr1	6233473	6233495	-	9
chr1	8867980	8868003	-	9
chr1	19113697	19113733	-	9
chr1	23310133	23310174	-	9
chr1	25900989	25901018	-	9
chr1	33324240	33324287	-	9
chr1	43981123	43981157	+	9
chr1	109281775	109281826	-	9
chr1	110022459	110022511	+	9
chr1	144560800	144560839	-	9
chr1	151400434	151400462	+	9
chr1	153535943	153535986	-	9
chr1	154207103	154207133	-	9
chr1	154207145	154207176	-	9
chr1	154582857	154582898	-	9
chr1	154584407	154584478	-	9
chr1	159918587	159918626	-	9
chr1	167541289	167541313	-	9
chr1	179844771	179844790	-	9
chr1	183251002	183251040	-	9
chr1	201483907	201483948	-	9
chr1	222733697	222733715	+	9
chr1	228098484	228098522	+	9
chr10	6167679	6167699	+	9
chr10	32901469	32901499	-	9
chr10	71816437	71816488	-	9
chr10	71817330	71817353	-	9
chr10	126017144	126017168	-	9
chr11	831864	831908	+	9
chr11	10802049	10802083	-	9
chr11	10808774	10808806	-	9
chr11	12941771	12941815	+	9
chr11	18402884	18402904	+	9
chr11	31408167	31408207	+	9
chr11	34100215	34100267	+	9
chr11	35230355	35230375	+	9
chr11	35230748	35230773	+	9
chr11	35231214	35231252	+	9
chr11	35231506	35231549	+	9
chr11	44244557	44244582	+	9
chr11	44619974	44620010	+	9
chr11	62519955	62519991	-	9
chr11	65352272	65352306	+	9
chr11	65503138	65503162	+	9
chr11	72003384	72003404	-	9
chr11	76550832	76550866	+	9
chr11	119018294	119018337	-	9
chr11	119306765	119306784	+	9
chr11	120475450	120475487	+	9
chr11	126277789	126277821	+	9
chr12	2858524	2858590	-	9
chr12	6537124	6537162	+	9
chr12	6965512	6965564	-	9
chr12	22449867	22449891	-	9
chr12	22453898	22453917	-	9
chr12	31103987	31104022	+	9
chr12	49273242	49273297	+	9
chr12	49642297	49642337	-	9
chr12	50100070	50100095	+	9
chr12	54408756	54408795	-	9
chr12	55994000	55994037	+	9
chr12	56144282	56144305	+	9
chr12	98533125	98533148	+	9
chr12	103947331	103947377	+	9
chr12	109852702	109852733	-	9
chr12	120698198	120698271	+	9
chr13	45283827	45283851	+	9
[truncated: 12,335 more rows]

## Sheet: Dataset S2
Chromosome	Start	End	Strand	Peak Score
chr7	5527484	5527517	-	1099
chr17	1400077	1400097	-	309
chrX	78126078	78126102	+	256
chr5	179614717	179614736	-	245
chr14	49586786	49586840	+	214
chrX	78104210	78104343	+	203
chrX	78103915	78103980	+	136
chr16	55484058	55484092	+	126
chr14	55684220	55684239	+	125
chr15	72199247	72199425	-	119
chr11	840300	840374	-	117
chr17	75248391	75248408	-	117
chr17	81510320	81510391	-	117
chr14	101986525	101986582	+	115
chr9	35657940	35657983	-	114
chr1	149692867	149692886	-	113
chrX	53462197	53462215	+	112
chr11	70436264	70436295	+	109
chr8	56074064	56074105	-	109
chrX	78103984	78104102	+	109
chr19	38729970	38730007	+	108
chr15	74409986	74410047	-	106
chr6	7289371	7289422	-	103
chr1	231422312	231422329	-	99
chr5	138934162	138934189	+	97
chr17	81510187	81510317	-	96
chr11	61967448	61967493	-	86
chr14	102081288	102081416	-	83
chr17	81510416	81510461	-	83
chr5	181241610	181241642	-	81
chr11	61965088	61965112	-	79
chr11	61967610	61967642	-	79
chrX	78103828	78103898	+	78
chr16	74774667	74774684	-	75
chr11	69652965	69652989	+	74
chr16	87384050	87384077	-	72
chr1	154214505	154214531	-	71
chr7	101137975	101138031	+	70
chr5	78476605	78476626	+	69
chr6	28478674	28478692	-	69
chr2	54973061	54973132	-	68
chr2	237334686	237334704	-	68
chr4	77075679	77075745	-	68
chr17	4945842	4945927	-	67
chr22	41246377	41246402	-	66
chr14	49853869	49853887	-	64
chr15	74410494	74410568	-	64
chr7	116560157	116560189	+	64
chr9	35658007	35658029	-	64
chr1	119929064	119929154	-	63
chr10	17233773	17233838	+	63
chr12	49764025	49764094	+	63
chr16	71928392	71928449	+	63
chr15	69453659	69453695	+	62
chr10	32911604	32911677	-	61
chr12	49764101	49764133	+	61
chr15	64155918	64156014	-	61
chr2	218274366	218274386	-	61
chr7	76327133	76327182	-	61
chr15	72199155	72199209	-	59
chr17	4948486	4948541	-	59
chr10	77637536	77637561	-	58
chr12	57181214	57181269	+	58
chr2	237334726	237334805	-	58
chr5	140726163	140726202	+	58
chr7	128769789	128769869	+	58
chr12	111447371	111447496	+	57
chr2	203427923	203427954	+	57
chr1	8867205	8867254	-	56
chr10	32911883	32911976	-	56
chr11	35230641	35230694	+	56
chr15	72217421	72217464	-	56
chr5	17276232	17276256	+	56
chr6	133476074	133476093	+	56
chr16	67438404	67438440	-	55
chr2	200478273	200478302	+	55
chr22	37675625	37675717	+	55
chr5	151663067	151663131	-	55
chr1	1786238	1786296	-	54
chr12	56644839	56644900	-	54
chr2	54987638	54987707	-	54
chr7	101138058	101138183	+	54
chr11	35231010	35231077	+	53
chr14	73588852	73588884	-	53
chr15	72199479	72199522	-	53
chrX	78126109	78126142	+	53
chr11	70436305	70436339	+	52
chr15	44717870	44717988	+	52
chr17	50074217	50074274	+	52
chr3	45224694	45224733	-	52
chr16	55479505	55479631	+	51
chr1	151983010	151983042	-	50
chr2	43467956	43467974	-	49
chrX	41348465	41348491	+	49
chr11	65505591	65505636	+	48
chr14	49853790	49853826	-	48
chr15	89335073	89335120	+	48
chr19	38730065	38730101	+	48
chr21	46125867	46125930	+	48
chr5	136063452	136063509	+	48
chr1	8012407	8012445	-	47
chr11	35221676	35221725	+	47
chr19	1435062	1435098	+	47
chr20	31606372	31606441	+	47
chrM	8601	8720	+	47
chr1	31497671	31497692	-	46
chr16	55484095	55484121	+	46
chr7	94394961	94395002	+	46
chrX	78125973	78126028	+	46
chr1	28200908	28200968	-	45
chr13	98018583	98018622	+	45
chr14	68884251	68884297	-	45
chr16	55482900	55482941	+	45
chr19	2233714	2233747	-	45
chr1	20485562	20485592	-	44
chr15	48415713	48415760	-	44
chr2	223975222	223975289	-	44
chr3	41240291	41240414	+	44
chr3	156540939	156540982	-	44
chr7	135927620	135927664	-	44
chrM	7670	7707	+	44
chr14	22565029	22565099	-	43
chr2	27051241	27051268	+	43
chr2	219289907	219289980	-	43
chr10	17235163	17235230	+	42
chr11	62630193	62630234	-	42
chr19	45478625	45478676	-	42
chr2	63891283	63891325	+	42
chr3	113720430	113720450	-	42
chr5	136063637	136063704	+	42
chr7	135927673	135927702	-	42
chr7	139566596	139566635	-	42
chr1	1786326	1786356	-	41
chr17	1344719	1344768	-	41
chr2	234494971	234495005	-	41
chr4	10116202	10116243	-	41
chr6	26330328	26330347	-	41
chr2	46356746	46356777	+	40
chr6	122444828	122444883	-	40
chr11	61964718	61964743	-	39
chr12	111447720	111447821	+	39
chr17	47656873	47656937	+	39
chr17	50201539	50201588	-	39
chr2	112646914	112646940	+	39
chr3	30692803	30692902	+	39
chr10	71817422	71817474	-	38
chr11	65900320	65900344	-	38
chr14	22846470	22846515	+	38
chr18	9860636	9860736	+	38
chr2	54972774	54972901	-	38
chr2	84906408	84906459	+	38
chr2	108685761	108685806	+	38
chr20	62139115	62139166	-	38
chr7	2730187	2730225	-	38
chr8	61684095	61684116	-	38
chr1	159918489	159918535	-	37
chr11	110231104	110231133	-	37
chr12	6534505	6534575	+	37
chr14	49853907	49853925	-	37
chr16	55482947	55483001	+	37
chr3	31636626	31636663	+	37
chr8	69922964	69922981	-	37
chr9	134642248	134642292	+	37
chrX	78126190	78126217	+	37
chr10	17229396	17229463	+	36
chr10	77854338	77854358	-	36
chr11	18405520	18405544	+	36
chr15	60347418	60347463	-	36
chr15	69452805	69452834	+	36
chr17	81510592	81510650	-	36
chr8	56074460	56074514	-	36
chr12	49129536	49129594	-	35
chr16	55505609	55505656	+	35
chr17	28860826	28860863	+	35
chr2	234494937	234494957	-	35
chr7	2380498	2380584	+	35
chr1	222733702	222733770	+	34
chr11	35230526	35230563	+	34
chr11	65854962	65855053	-	34
chr11	65890662	65890680	+	34
chr14	22920660	22920681	-	34
chr2	203427965	203427988	+	34
chr8	23842289	23842363	-	34
chrM	11231	11297	+	34
chr1	201969898	201969918	+	33
chr10	73007780	73007834	-	33
chr12	120701036	120701069	+	33
chr15	44717655	44717763	+	33
chr15	63071702	63071748	+	33
chr3	45224618	45224669	-	33
chr3	123613891	123613938	-	33
chr7	5605851	5605873	+	33
chr1	119914424	119914492	-	32
chr11	65891267	65891295	+	32
chr17	81681437	81681468	-	32
chr2	118108801	118108820	+	32
chr2	218274401	218274456	-	32
chr3	113720394	113720422	-	32
chr6	151355823	151355878	+	32
chr8	47773814	47773837	-	32
chr9	87726125	87726173	+	32
chrM	9807	9899	+	32
chr10	102480063	102480089	-	31
chr11	35230472	35230520	+	31
chr19	38730228	38730341	+	31
chr2	215361027	215361050	-	31
chr2	237341113	237341155	-	31
chr4	6642216	6642287	+	31
chr11	35232153	35232210	+	30
chr12	55728269	55728314	-	30
chr16	28135245	28135295	-	30
chr19	12939502	12939525	+	30
chr2	65087989	65088031	-	30
chr2	215361097	215361155	-	30
chr2	237324448	237324521	-	30
chr4	165342768	165342803	+	30
chr5	179728938	179729038	+	30
chr7	101137933	101137963	+	30
chr7	135927081	135927146	-	30
chr1	159141636	159141675	-	29
chr10	17235288	17235334	+	29
chr10	86437512	86437534	-	29
chr11	63625073	63625128	-	29
chr11	65896968	65896994	-	29
chr12	55727192	55727294	-	29
chr12	120198579	120198619	-	29
chr16	1700988	1701013	+	29
chr16	46674402	46674435	-	29
chr17	1344953	1344986	-	29
chr2	54972241	54972303	-	29
chr5	72207968	72208041	+	29
chr6	136259154	136259175	-	29
chr7	135927722	135927797	-	29
chr8	11847105	11847138	-	29
chrX	154018086	154018112	-	29
chr1	39563703	39563743	-	28
chr1	161422157	161422174	-	28
chr1	223775599	223775661	+	28
chr10	17233874	17233938	+	28
chr10	33256317	33256373	-	28
chr11	18407378	18407433	+	28
chr11	69653029	69653077	+	28
chr12	120694854	120694887	+	28
chr14	73712960	73713026	-	28
chr16	28842976	28843015	-	28
chr17	4948296	4948375	-	28
chr3	98799819	98799847	-	28
chr5	17276270	17276320	+	28
chr6	34245036	34245061	+	28
chr6	151355791	151355820	+	28
chrM	6195	6247	+	28
chrX	151409237	151409258	+	28
chr1	16396626	16396659	+	27
chr1	20485611	20485680	-	27
chr1	28200977	28201027	-	27
chr1	100976191	100976220	+	27
chr10	17229324	17229374	+	27
chr10	17235837	17235880	+	27
chr11	10802187	10802222	-	27
chr12	51242504	51242527	+	27
chr12	120212195	120212217	-	27
chr14	102084954	102085006	-	27
chr19	55386341	55386378	+	27
chr20	44907390	44907443	+	27
chr3	48468548	48468603	-	27
chr5	136063511	136063556	+	27
chr5	179729152	179729252	+	27
chr9	35657871	35657897	-	27
chr9	127506074	127506111	-	27
chrX	65741005	65741087	+	27
chr1	24844084	24844103	+	26
chr1	55081317	55081381	-	26
chr10	32911979	32912046	-	26
chr10	74119245	74119268	+	26
chr10	122461698	122461758	+	26
chr10	122514629	122514723	+	26
chr12	54395331	54395436	-	26
chr14	69769557	69769590	+	26
chr15	69455192	69455256	+	26
chr16	58629753	58629810	-	26
chr17	1361095	1361124	-	26
chr17	16440191	16440220	+	26
chr17	16441360	16441400	+	26
chr18	12310984	12311024	+	26
chr19	41259944	41260048	+	26
chr2	20202135	20202180	-	26
chr2	109301902	109301919	+	26
chr2	219289981	219290035	-	26
chr22	41246497	41246560	-	26
chr3	52533616	52533648	-	26
chr6	30725188	30725224	+	26
chr9	133361742	133361820	-	26
chrX	16853679	16853776	-	26
chrX	49071281	49071348	-	26
chr1	8866416	8866500	-	25
chr1	11056012	11056043	-	25
chr1	113895398	113895425	-	25
chr1	183103355	183103406	+	25
chr1	205714676	205714729	-	25
chr12	49131306	49131355	-	25
chr14	61795071	61795115	+	25
chr14	68789304	68789403	-	25
chr15	52550750	52550773	-	25
chr15	72209734	72209759	-	25
chr17	28624302	28624336	-	25
chr17	42404516	42404604	-	25
chr2	215383452	215383482	-	25
chr20	49063202	49063251	+	25
chr3	86946327	86946352	-	25
chr3	98901168	98901246	-	25
chr5	137754261	137754315	-	25
chr5	151663268	151663383	-	25
chr7	94395014	94395033	+	25
chr7	101138218	101138261	+	25
chr7	128770014	128770098	+	25
chr8	11844843	11844949	-	25
chrY	12273668	12273687	+	25
chr1	111461004	111461064	+	24
chr1	153535277	153535353	-	24
chr1	201969848	201969887	+	24
chr1	227193885	227193927	-	24
chr11	809953	809987	+	24
chr11	10808774	10808803	-	24
chr11	35229889	35229929	+	24
chr12	120698529	120698591	+	24
chr15	72231124	72231167	-	24
chr15	74410296	74410345	-	24
chr17	28648660	28648704	-	24
chr17	42403007	42403116	-	24
chr19	4657769	4657795	-	24
chr19	38730105	38730188	+	24
chr2	54647170	54647218	+	24
chr2	84906532	84906564	+	24
chr2	216499967	216500038	+	24
chr20	36049664	36049707	-	24
chr21	46004443	46004498	+	24
chr22	36281353	36281456	-	24
chr3	98797622	98797718	-	24
chr3	98798920	98798993	-	24
chr3	196050151	196050186	-	24
chr5	151808583	151808615	+	24
chr6	28643460	28643483	+	24
chr6	83164785	83164804	+	24
chr7	44213644	44213675	+	24
chr1	8874832	8874907	-	23
chr1	55068386	55068405	-	23
chr10	17234736	17234781	+	23
chr11	35230220	35230283	+	23
chr11	62529246	62529285	-	23
chr11	69652912	69652950	+	23
chr11	69653085	69653114	+	23
chr12	6538290	6538338	+	23
chr12	49763062	49763139	+	23
chr12	120697579	120697603	+	23
chr14	102081476	102081545	-	23
chr14	104937904	104937939	-	23
chr15	63071399	63071424	+	23
chr17	39531389	39531418	+	23
chr17	42403225	42403294	-	23
chr2	215367953	215367988	-	23
chr2	236214576	236214595	+	23
chr3	41240250	41240289	+	23
chr3	98798061	98798127	-	23
chr4	1975331	1975376	+	23
chr4	173331971	173332015	-	23
chr6	28863749	28863767	-	23
chr7	128770494	128770568	+	23
chr8	97726211	97726252	+	23
chr9	114598194	114598214	+	23
chrX	154365138	154365185	-	23
chr1	223771803	223771845	+	22
chr10	17229837	17229890	+	22
chr11	62516396	62516438	-	22
chr11	65896905	65896941	-	22
chr12	120199182	120199203	-	22
chr15	56029856	56029874	-	22
chr17	81843814	81843889	-	22
chr17	81868479	81868538	-	22
chr2	20201536	20201590	-	22
chr2	33389280	33389306	+	22
chr2	112663179	112663216	+	22
chr2	132255394	132255411	-	22
chr2	215430799	215430855	-	22
chr2	215431831	215431909	-	22
chr20	31514682	31514723	+	22
chr22	35739353	35739378	-	22
chr3	39411930	39411972	+	22
chr3	98797271	98797372	-	22
chr3	98901558	98901599	-	22
chr3	196829750	196829775	+	22
chr5	136063561	136063589	+	22
chr5	176658809	176658866	+	22
chr6	34245135	34245177	+	22
chr6	146554640	146554697	+	22
chr1	8012560	8012626	-	21
chr1	33324164	33324226	-	21
chr1	154583311	154583357	-	21
chr1	227193847	227193867	-	21
chr11	35229948	35229986	+	21
chr11	65890718	65890742	+	21
chr11	69654004	69654099	+	21
chr12	49764456	49764510	+	21
chr12	121347829	121347862	-	21
chr14	68788622	68788706	-	21
chr15	43771350	43771395	+	21
chr15	69452844	69452915	+	21
chr15	83016680	83016709	-	21
chr16	55505743	55505830	+	21
chr17	66806043	66806066	+	21
chr19	2101529	2101571	-	21
chr2	54456371	54456400	+	21
chr22	20949863	20949887	+	21
chr3	98799208	98799283	-	21
chr3	196829712	196829740	+	21
chr4	26431867	26431922	+	21
chr4	77075749	77075767	-	21
chr5	72208800	72208880	+	21
chr6	31862636	31862668	-	21
chr7	5527286	5527311	-	21
chr7	76327915	76327948	-	21
chrX	124037541	124037566	+	21
chr1	1786358	1786379	-	20
chr1	27405827	27405852	-	20
chr11	35232213	35232234	+	20
chr11	65500695	65500721	+	20
chr12	49763897	49763973	+	20
chr14	102081665	102081746	-	20
chr15	72218939	72219010	-	20
chr16	55506084	55506127	+	20
chr17	4945799	4945830	-	20
chr17	50194161	50194190	-	20
chr17	66806020	66806038	+	20
chr19	3976191	3976231	-	20
chr4	152911286	152911343	+	20
chr5	151662750	151662825	-	20
chr9	33113230	33113288	-	20
chr9	35056748	35056845	-	20
chr9	130854954	130854978	+	20
chr1	43170754	43170813	-	19
chr1	152032598	152032674	-	19
chr1	156742148	156742242	-	19
chr1	183144333	183144400	+	19
chr10	77637422	77637502	-	19
chr11	69652486	69652565	+	19
chr12	6531752	6531788	+	19
chr12	54395902	54395986	-	19
chr12	120293148	120293177	-	19
chr12	120697870	120697895	+	19
chr14	22846536	22846576	+	19
chr14	103341519	103341571	+	19
chr15	48613029	48613077	-	19
chr15	72199211	72199243	-	19
chr16	21612713	21612748	+	19
chr17	5022147	5022170	+	19
chr17	35724356	35724422	+	19
chr17	42402772	42402832	-	19
chr17	42404431	42404491	-	19
chr19	46610342	46610385	+	19
chr2	10129554	10129579	+	19
chr2	10129589	10129608	+	19
chr2	101888832	101888867	+	19
chr20	58909969	58909995	+	19
chr21	8218713	8218731	+	19
chr3	133589635	133589677	+	19
chr5	136063604	136063636	+	19
chr5	178895966	178895987	+	19
chr6	133476094	133476113	+	19
chr8	61625873	61625943	-	19
chr9	33112407	33112445	-	19
chr9	119276005	119276023	-	19
chrM	9300	9334	+	19
chrX	78104132	78104198	+	19
chrX	78126267	78126307	+	19
chrX	103377988	103378029	+	19
chr1	2307781	2307807	+	18
chr1	8861192	8861255	-	18
chr1	152032770	152032790	-	18
chr1	206733434	206733517	+	18
chr10	17236289	17236333	+	18
chr11	13729885	13729922	+	18
chr11	35230717	35230735	+	18
chr11	65505648	65505690	+	18
chr11	65855150	65855182	-	18
chr11	65855982	65856038	-	18
chr11	69654175	69654265	+	18
chr12	49764601	49764633	+	18
chr13	98519264	98519316	-	18
chr14	51254601	51254648	+	18
chr14	68789457	68789493	-	18
chr14	90405221	90405300	+	18
chr14	96566211	96566236	+	18
chr14	101986143	101986163	+	18
chr14	103341582	103341606	+	18
chr14	103522589	103522608	-	18
chr15	65296040	65296071	+	18
chr19	1435017	1435056	+	18
chr19	38730012	38730062	+	18
chr2	37228130	37228183	-	18
chr2	215360990	215361026	-	18
chr2	237324193	237324246	-	18
chr2	237352521	237352560	-	18
chr20	45426067	45426085	+	18
chr22	38483545	38483623	-	18
chr3	48468140	48468189	-	18
chr3	127691231	127691276	-	18
chr3	184183678	184183785	+	18
chr5	136061508	136061583	+	18
chr5	151663165	151663194	-	18
chr5	151808631	151808656	+	18
chr7	76328009	76328057	-	18
chr7	135675091	135675121	+	18
chr8	11844758	11844780	-	18
chr9	105366366	105366385	+	18
chrM	1748	1771	+	18
chrM	6387	6450	+	18
chrM	9044	9077	+	18
chrM	10898	10934	+	18
chrM	11709	11767	+	18
chrM	13997	14058	+	18
chrX	65741206	65741266	+	18
chrX	123908108	123908145	+	18
chrX	154368006	154368033	-	18
chr1	16396585	16396619	+	17
chr10	71816718	71816742	-	17
chr10	71821995	71822014	-	17
chr10	122514452	122514491	+	17
chr11	502062	502129	-	17
chr11	18407619	18407654	+	17
chr11	61967504	61967562	-	17
chr11	65500946	65501028	+	17
chr11	65502871	65502891	+	17
chr11	65505117	65505189	+	17
chr11	70436150	70436201	+	17
chr12	6968466	6968489	-	17
chr12	13215389	13215415	+	17
chr12	49127836	49127936	-	17
chr12	49184871	49184917	-	17
chr12	49763223	49763302	+	17
chr12	56638289	56638338	-	17
chr12	112508181	112508221	+	17
chr12	122865880	122865924	-	17
chr13	98018629	98018654	+	17
chr13	113263885	113263961	+	17
chr14	21210204	21210240	-	17
chr14	55673239	55673260	+	17
chr14	102027623	102027668	+	17
chr14	103341619	103341662	+	17
chr15	72206728	72206822	-	17
chr16	55505408	55505465	+	17
chr16	55506131	55506171	+	17
chr16	58521189	58521220	-	17
chr17	4945736	4945784	-	17
chr17	16441631	16441662	+	17
chr17	38853717	38853737	-	17
chr17	78223873	78223938	+	17
chr17	81843566	81843629	-	17
chr18	46088158	46088196	-	17
chr19	2101382	2101454	-	17
chr2	26135873	26135928	+	17
chr2	157736969	157737005	-	17
chr2	215419299	215419347	-	17
chr2	216501473	216501505	+	17
chr2	237324280	237324349	-	17
chr21	41887852	41887893	-	17
chr22	36281823	36281872	-	17
chr3	45224823	45224878	-	17
chr3	55467329	55467362	-	17
chr3	120338942	120338959	-	17
chr5	72909624	72909654	+	17
chr5	96774468	96774491	+	17
chr5	122065061	122065111	-	17
chr5	136046333	136046381	+	17
chr5	179729041	179729107	+	17
chr6	109368140	109368180	-	17
chr7	260096	260155	+	17
chr7	99419482	99419510	+	17
chr7	101138866	101138890	+	17
chr7	128769270	128769319	+	17
chr8	66113403	66113430	+	17
chr8	143921811	143921852	-	17
chr9	35722184	35722219	-	17
chr9	115020855	115020886	-	17
chrM	12583	12612	+	17
chr1	8861293	8861366	-	16
chr1	35184352	35184371	-	16
chr1	159918438	159918488	-	16
chr1	167765671	167765691	+	16
chr1	206733064	206733121	+	16
chr10	32901450	32901499	-	16
chr10	71817317	71817353	-	16
chr11	35230410	35230451	+	16
chr11	47466931	47466953	-	16
chr11	47466960	47467006	-	16
chr12	110731822	110731848	-	16
chr12	112022788	112022816	+	16
chr13	76882553	76882620	-	16
chr14	54420043	54420078	+	16
chr14	58239960	58239980	-	16
chr14	70031772	70031794	+	16
chr14	102081146	102081200	-	16
chr14	102085349	102085392	-	16
chr15	32731922	32731962	+	16
chr15	43793910	43793941	+	16
chr16	8855053	8855096	-	16
chr16	31112144	31112171	+	16
chr16	55505565	55505598	+	16
chr17	42403977	42404018	-	16
chr17	81510087	81510122	-	16
chr2	101829570	101829593	+	16
chr2	187465021	187465065	-	16
chr2	226793901	226793938	-	16
chr20	44908130	44908174	+	16
chr21	41993127	41993149	-	16
chr21	46121055	46121085	+	16
chr22	35739396	35739414	-	16
chr22	37676979	37677023	+	16
chr3	141925865	141925919	+	16
chr5	179729432	179729521	+	16
chr7	76328542	76328603	-	16
chr7	94395039	94395066	+	16
chr7	94410453	94410534	+	16
chr7	101137570	101137606	+	16
chr7	101139174	101139207	+	16
chr8	23136357	23136432	-	16
chr8	54147689	54147717	+	16
chrM	7097	7151	+	16
chrM	12051	12098	+	16
chrX	65740202	65740240	+	16
chrX	154348612	154348673	-	16
chrX	154365191	154365223	-	16
chr1	1786206	1786231	-	15
chr1	1786517	1786549	-	15
chr1	20485383	20485419	-	15
chr1	47377468	47377572	+	15
chr1	77161318	77161372	-	15
chr1	205715582	205715614	-	15
chr1	228098052	228098095	+	15
chr10	17229655	17229697	+	15
chr10	17235339	17235391	+	15
chr10	71816650	71816700	-	15
chr10	122514804	122514861	+	15
chr11	866952	866970	+	15
chr11	6641876	6641894	+	15
chr11	10803223	10803262	-	15
chr11	12941816	12941838	+	15
chr11	18407440	18407493	+	15
chr11	35230365	35230403	+	15
chr11	35231929	35231978	+	15
chr11	43344043	43344063	+	15
chr11	57299829	57299929	-	15
chr11	57334524	57334583	-	15
chr11	62521506	62521538	-	15
chr11	69653225	69653263	+	15
chr12	6731132	6731156	+	15
chr12	13215567	13215646	+	15
chr12	21469798	21469818	-	15
chr12	49764792	49764840	+	15
chr12	54395655	54395692	-	15
chr12	55727150	55727186	-	15
chr12	56663866	56663894	-	15
chr12	111418257	111418288	+	15
chr12	112502169	112502206	+	15
chr12	120694219	120694254	+	15
chr13	23574131	23574148	+	15
chr13	113499998	113500063	+	15
chr14	22846085	22846172	+	15
chr14	22846368	22846455	+	15
chr14	58508583	58508602	+	15
chr14	69380358	69380390	-	15
chr14	100334636	100334666	-	15
chr15	63071351	63071387	+	15
chr15	66503150	66503171	-	15
chr15	72199709	72199747	-	15
chr15	72210405	72210441	-	15
chr15	92808644	92808662	+	15
chr16	681263	681296	+	15
chr16	56608647	56608685	+	15
chr16	88715480	88715527	-	15
chr17	1897461	1897491	+	15
chr17	4946667	4946712	-	15
chr17	7461179	7461205	-	15
chr17	28357402	28357498	-	15
chr17	42403608	42403644	-	15
chr17	42404386	42404430	-	15
chr17	47684307	47684334	+	15
chr17	50072051	50072084	+	15
chr17	50074137	50074208	+	15
chr17	60786221	60786241	+	15
chr17	76679724	76679756	-	15
chr17	81868206	81868278	-	15
chr17	81868400	81868424	-	15
chr19	810959	810978	+	15
chr19	2101671	2101705	-	15
chr19	10691474	10691492	+	15
chr19	22694890	22694907	-	15
chr19	48966362	48966395	+	15
chr2	54982560	54982622	-	15
chr2	215361516	215361601	-	15
chr2	215386727	215386766	-	15
chr2	215433355	215433407	-	15
chr2	218595265	218595299	+	15
chr20	35557190	35557215	+	15
chr20	44499694	44499714	-	15
chr20	45326678	45326715	-	15
chr21	25881340	25881378	-	15
chr22	41246347	41246371	-	15
chr3	10115771	10115815	+	15
chr3	39408623	39408670	+	15
chr3	48468926	48469000	-	15
chr3	52528007	52528057	-	15
chr3	58130813	58130845	+	15
chr3	98901261	98901328	-	15
chr3	128637913	128637988	-	15
chr3	146110426	146110450	-	15
chr3	157443175	157443202	+	15
chr3	179588288	179588306	+	15
chr3	196049510	196049573	-	15
chr4	98471373	98471401	-	15
chr5	177595771	177595797	+	15
chr6	119177400	119177425	-	15
chr6	119177431	119177453	-	15
chr7	99419535	99419560	+	15
chr7	112405029	112405047	-	15
chr7	134969678	134969711	+	15
chr8	26410578	26410632	+	15
chr8	47977671	47977697	+	15
chr8	100919267	100919298	-	15
chr9	19380216	19380246	-	15
chr9	105365603	105365625	+	15
chr9	108979291	108979365	-	15
chr9	131578464	131578499	-	15
chrM	11478	11528	+	15
chrM	14120	14160	+	15
chrM	15434	15498	+	15
chrM	15612	15663	+	15
chrX	12975128	12975161	+	15
chr1	2434348	2434366	+	14
chr1	6591314	6591366	-	14
chr1	8012236	8012279	-	14
chr1	8861115	8861138	-	14
chr1	8878600	8878650	-	14
chr1	24842552	24842603	+	14
chr1	26281199	26281258	+	14
chr1	33009525	33009549	-	14
chr1	114706148	114706180	-	14
chr1	153535215	153535273	-	14
chr1	159918647	159918708	-	14
chr1	162781599	162781627	+	14
chr1	203742665	203742731	+	14
chr1	203743059	203743130	+	14
chr1	225402250	225402283	-	14
chr10	17229906	17229990	+	14
chr10	17233584	17233610	+	14
chr10	32894988	32895007	-	14
chr10	122461975	122462054	+	14
chr10	126017106	126017139	-	14
chr11	18405455	18405517	+	14
chr11	57324856	57324873	-	14
chr11	65892522	65892563	-	14
chr11	65892762	65892824	-	14
chr11	65900250	65900278	-	14
chr11	123057665	123057699	-	14
chr12	51242898	51242927	+	14
chr12	57212722	57212740	+	14
chr12	106237943	106238014	-	14
chr12	111418237	111418256	+	14
chr12	130876111	130876186	+	14
chr13	91354185	91354214	+	14
chr14	31107645	31107703	-	14
chr14	68788709	68788740	-	14
chr14	102015122	102015177	+	14
chr15	44717839	44717869	+	14
chr15	48420690	48420722	-	14
chr15	74409812	74409855	-	14
chr16	8853687	8853771	-	14
chr16	55483057	55483100	+	14
chr17	17158588	17158618	+	14
chr17	17188127	17188216	+	14
chr17	18208585	18208642	+	14
chr17	18209175	18209227	+	14
chr17	42403739	42403781	-	14
chr17	81843705	81843810	-	14
chr19	3976394	3976445	-	14
chr19	38729444	38729480	+	14
chr19	48966628	48966679	+	14
chr2	132255661	132255680	-	14
chr2	134452063	134452106	+	14
chr2	152143924	152143949	-	14
chr2	200478314	200478347	+	14
chr2	215409606	215409699	-	14
chr2	218959724	218959742	+	14
chr20	41163443	41163476	+	14
chr20	45326642	45326662	-	14
chr20	49114532	49114586	-	14
chr20	63933039	63933068	+	14
chr21	8210738	8210768	+	14
chr22	36282143	36282187	-	14
chr22	38821253	38821341	-	14
chr22	38865615	38865646	-	14
chr3	32481721	32481771	-	14
chr3	52528188	52528234	-	14
chr3	57556358	57556397	+	14
chr3	98798210	98798249	-	14
chr3	141447884	141447908	+	14
chr4	67616945	67617021	-	14
chr4	99950195	99950273	-	14
chr4	186598048	186598077	-	14
chr5	72205452	72205476	+	14
chr5	136063725	136063784	+	14
chr5	150297102	150297121	-	14
chr5	151804209	151804249	+	14
chr5	180791035	180791093	-	14
chr6	26104164	26104254	+	14
chr6	27505866	27505892	-	14
chr7	74099133	74099154	+	14
chr7	76328780	76328846	-	14
chr7	106208179	106208198	+	14
chr7	128769458	128769521	+	14
chr7	128769970	128770011	+	14
chr8	8891780	8891817	-	14
chr8	27735956	27735984	-	14
chr8	47773782	47773807	-	14
chr8	100703151	100703178	-	14
chr8	100703275	100703318	-	14
chr8	143915467	143915510	-	14
chr9	34589038	34589055	-	14
chr9	76571807	76571858	+	14
chr9	98015647	98015703	+	14
chr9	127506128	127506176	-	14
chrM	12437	12486	+	14
chrX	154348710	154348761	-	14
chr1	1785700	1785727	-	13
chr1	8865396	8865444	-	13
chr1	8867124	8867199	-	13
chr1	20483486	20483531	-	13
chr1	32775929	32775977	-	13
chr1	70251839	70251896	+	13
chr1	150623941	150623973	-	13
chr1	151982943	151982998	-	13
chr1	152032731	152032759	-	13
chr1	159918602	159918626	-	13
chr1	161531101	161531119	+	13
chr1	228098480	228098523	+	13
chr1	230281807	230281837	+	13
chr10	125816186	125816208	-	13
chr11	35229715	35229774	+	13
chr11	35231665	35231696	+	13
chr11	65888328	65888370	-	13
chr11	69651669	69651703	+	13
chr11	70435257	70435289	+	13
chr11	70435746	70435788	+	13
chr12	27423204	27423236	+	13
chr12	49272949	49272974	+	13
chr12	57211183	57211244	+	13
chr12	57431168	57431190	+	13
chr12	118052383	118052428	-	13
chr12	120698289	120698324	+	13
chr13	38361884	38361920	+	13
chr13	98022011	98022042	+	13
chr13	113495572	113495636	+	13
chr14	22846609	22846659	+	13
chr14	51254650	51254754	+	13
chr14	69380219	69380269	-	13
chr14	96089859	96089882	+	13
chr14	102028073	102028108	+	13
chr15	63323961	63324023	-	13
chr15	72199595	72199617	-	13
chr15	72200513	72200572	-	13
chr16	55505466	55505541	+	13
chr17	5022217	5022265	+	13
chr17	41689904	41689944	+	13
chr17	42403935	42403968	-	13
chr17	44803445	44803489	-	13
chr17	44932163	44932183	-	13
chr17	50188742	50188796	-	13
chr17	58491193	58491217	-	13
chr17	60786255	60786274	+	13
chr17	76680690	76680728	-	13
chr18	12325893	12325950	+	13
chr19	2429942	2430019	-	13
chr19	12944146	12944200	+	13
chr19	39369763	39369821	+	13
chr2	54629286	54629305	+	13
chr2	54668637	54668719	+	13
chr2	54973020	54973058	-	13
chr2	69387191	69387227	-	13
chr2	215428229	215428270	-	13
chr2	237324642	237324680	-	13
chr2	237377044	237377073	-	13
chr20	35949434	35949454	+	13
chr21	46112062	46112113	+	13
chr22	20951099	20951134	+	13
chr22	36282464	36282545	-	13
chr3	50289271	50289341	-	13
chr3	52528445	52528466	-	13
chr3	98798404	98798468	-	13
chr3	127691190	127691208	-	13
chr3	130998358	130998386	+	13
chr3	194437421	194437466	-	13
chr4	8866718	8866735	-	13
chr5	136060868	136060931	+	13
chr5	137754321	137754357	-	13
chr5	177595580	177595642	+	13
chr5	179729523	179729569	+	13
chr5	179800190	179800224	-	13
chr6	32370172	32370195	+	13
chr6	43785798	43785867	+	13
chr6	44253706	44253756	+	13
chr6	122456555	122456590	-	13
chr6	159991275	159991312	+	13
chr7	74083824	74083852	+	13
chr7	74083976	74084040	+	13
chr7	98291129	98291161	+	13
chr7	101137841	101137885	+	13
chr7	106091117	106091172	-	13
chr7	116797060	116797120	+	13
chr7	128769937	128769969	+	13
chr7	128846809	128846842	+	13
chr7	128848842	128848907	+	13
chr7	135927293	135927319	-	13
chr9	34634831	34634888	-	13
chr9	112687489	112687513	-	13
chrM	7818	7905	+	13
chrM	9712	9777	+	13
chrM	11200	11229	+	13
chrX	37490973	37490990	+	13
chrX	154360511	154360548	-	13
chr1	39442853	39442876	+	12
chr1	45511125	45511145	-	12
chr1	116404503	116404528	+	12
chr1	119912970	119913030	-	12
chr1	145465727	145465789	-	12
chr1	153534719	153534784	-	12
chr1	173866019	173866037	-	12
chr1	173866705	173866723	-	12
chr1	183144301	183144326	+	12
chr1	223775116	223775176	+	12
chr1	234606580	234606633	-	12
chr1	244858162	244858233	-	12
chr10	33254178	33254212	-	12
chr10	71816600	71816638	-	12
chr10	71816757	71816806	-	12
chr10	74119344	74119376	+	12
chr10	91863617	91863642	+	12
chr11	812547	812618	+	12
chr11	59551772	59551809	+	12
chr11	62519958	62519980	-	12
chr11	62629228	62629254	-	12
chr11	69654133	69654173	+	12
chr11	70436428	70436503	+	12
chr11	123083834	123083864	-	12
chr12	6537110	6537168	+	12
chr12	13215481	13215511	+	12
chr12	56144328	56144390	+	12
chr12	132772184	132772215	-	12
chr13	113322893	113322928	+	12
chr14	52671632	52671663	-	12
chr14	55684197	55684218	+	12
chr14	75132360	75132393	-	12
chr14	90405156	90405216	+	12
chr14	106636660	106636677	+	12
chr15	43793766	43793825	+	12
chr15	64155862	64155916	-	12
chr15	70854081	70854139	-	12
chr15	73927662	73927679	-	12
chr16	8854946	8855019	-	12
chr16	22285255	22285282	+	12
chr16	55489711	55489743	+	12
chr17	16381103	16381174	+	12
chr17	18208790	18208817	+	12
chr17	42402619	42402668	-	12
chr17	42403677	42403700	-	12
chr17	50064585	50064608	+	12
chr17	50068204	50068273	+	12
chr17	50072097	50072119	+	12
chr17	50187882	50187918	-	12
chr17	50201500	50201529	-	12
chr17	59681377	59681420	+	12
chr17	62666486	62666519	+	12
chr17	81510138	81510157	-	12
chr18	59328634	59328668	-	12
chr19	580678	580745	+	12
chr19	3983118	3983199	-	12
chr19	6035603	6035620	-	12
chr19	41260093	41260120	+	12
chr19	41260876	41260923	+	12
chr19	41861157	41861212	+	12
chr19	55117281	55117320	-	12
chr19	55385926	55385968	+	12
chr2	38068918	38068968	-	12
chr2	54972927	54972979	-	12
chr2	70280694	70280728	+	12
chr2	131048826	131048849	-	12
chr2	152175690	152175731	-	12
chr2	200817101	200817137	+	12
chr2	215379302	215379324	-	12
chr2	215406279	215406302	-	12
chr2	216499349	216499397	+	12
chr2	223975523	223975558	-	12
chr2	237366020	237366045	-	12
chr20	44511309	44511326	-	12
chr20	50958515	50958544	-	12
chr21	8210771	8210790	+	12
chr21	37202651	37202686	+	12
chr22	37678463	37678550	+	12
chr22	38819691	38819711	-	12
chr22	41246238	41246310	-	12
chr3	30693721	30693756	+	12
chr3	31623772	31623805	+	12
chr3	41240103	41240164	+	12
chr3	57270025	57270072	+	12
chr3	98901454	98901494	-	12
chr3	128813908	128813964	+	12
chr3	149030604	149030644	-	12
chr4	75645080	75645128	-	12
chr5	10254730	10254754	+	12
chr5	32602024	32602058	+	12
chr5	179836680	179836704	+	12
chr5	179836735	179836794	+	12
chr6	34245464	34245488	+	12
chr6	43784987	43785055	+	12
chr6	43785126	43785146	+	12
chr6	43785917	43785971	+	12
chr6	73824508	73824545	+	12
chr6	75253716	75253780	-	12
chr6	121448149	121448212	+	12
chr6	151351058	151351132	+	12
chr7	44828568	44828586	-	12
chr7	73699646	73699730	-	12
chr7	74121884	74121919	+	12
chr7	74195776	74195811	+	12
chr7	128770100	128770121	+	12
chr7	128770245	128770277	+	12
chr7	128770405	128770439	+	12
chr7	128770460	128770489	+	12
chr7	128848943	128848966	+	12
chr7	134968503	134968593	+	12
chr7	135927528	135927593	-	12
chr7	149589100	149589117	-	12
chr7	151556257	151556302	-	12
chr8	23842254	23842287	-	12
chr8	133238088	133238127	-	12
chr9	91409274	91409300	-	12
chr9	127510263	127510291	-	12
chr9	128694740	128694764	+	12
chrX	109642684	109642706	-	12
chrX	150767872	150767902	-	12
chrX	154364903	154364930	-	12
chr1	20482490	20482540	-	11
chr1	53766423	53766470	-	11
chr1	153534802	153534835	-	11
chr1	159918211	159918249	-	11
chr1	205715644	205715673	-	11
chr1	206733369	206733429	+	11
chr1	223762179	223762237	+	11
chr1	230280106	230280152	+	11
chr10	32958182	32958224	-	11
chr10	71816807	71816846	-	11
chr10	97456789	97456835	+	11
chr10	100183798	100183834	-	11
chr10	100361168	100361210	+	11
chr10	100362878	100362922	+	11
chr10	104266080	104266101	+	11
chr10	126017007	126017040	-	11
chr11	866914	866934	+	11
chr11	18396830	18396856	+	11
chr11	18407497	18407548	+	11
chr11	34100720	34100753	+	11
chr11	35231487	35231524	+	11
chr11	61967569	61967593	-	11
chr11	65505739	65505759	+	11
chr11	65539570	65539606	-	11
chr11	67398587	67398631	-	11
chr11	69651844	69651900	+	11
chr11	69653006	69653028	+	11
chr12	15903247	15903297	+	11
chr12	27385508	27385563	+	11
chr12	49762885	49762943	+	11
chr12	56239327	56239368	-	11
chr12	76027828	76027894	-	11
chr12	120293230	120293247	-	11
chr12	120698351	120698368	+	11
chr14	22847053	22847105	+	11
chr14	54427153	54427183	-	11
chr14	55069119	55069153	+	11
chr14	68789494	68789523	-	11
chr14	81473798	81473856	-	11
chr14	101986477	101986515	+	11
chr14	101994271	101994309	+	11
chr14	102004759	102004802	+	11
chr14	102005135	102005201	+	11
chr15	32732020	32732090	+	11
chr15	48410567	48410603	-	11
chr15	48470642	48470673	-	11
chr15	49126667	49126707	-	11
chr15	69455452	69455471	+	11
chr16	31180168	31180199	+	11
chr16	47143870	47143930	-	11
chr16	55485378	55485417	+	11
chr17	7224629	7224698	+	11
chr17	17185137	17185172	+	11
chr17	18247724	18247763	-	11
chr17	21002185	21002222	-	11
chr17	41867354	41867375	-	11
chr17	42402979	42403004	-	11
chr17	43211145	43211190	+	11
chr17	47673009	47673044	+	11
chr17	50090201	50090220	+	11
chr17	50194797	50194837	-	11
chr17	81843431	81843492	-	11
chr18	46088121	46088157	-	11
chr18	59328544	59328564	-	11
chr18	59329663	59329726	-	11
chr19	12940802	12940839	+	11
chr19	38729772	38729818	+	11
chr19	41869030	41869061	+	11
chr19	47741615	47741675	+	11
chr19	49489898	49489926	+	11
chr19	57306362	57306383	+	11
chr2	9630480	9630541	-	11
chr2	26191483	26191532	-	11
chr2	54456430	54456478	+	11
chr2	61031526	61031550	+	11
chr2	205354219	205354236	+	11
chr2	219178595	219178637	+	11
chr2	237376855	237376885	-	11
chr2	241352232	241352316	+	11
chr20	32849400	32849434	+	11
chr20	35626655	35626685	-	11
chr20	35699424	35699457	+	11
chr20	38092254	38092288	+	11
chr20	49058508	49058537	+	11
chr20	49319323	49319341	-	11
chr21	45981858	45981907	+	11
chr22	24542854	24542903	-	11
chr22	36282589	36282651	-	11
chr22	36282656	36282689	-	11
chr3	49533741	49533776	+	11
chr3	51674451	51674480	+	11
chr3	98797907	98797981	-	11
chr3	98798473	98798527	-	11
chr3	98798531	98798556	-	11
chr3	98799775	98799812	-	11
chr3	98817821	98817896	-	11
chr3	123613856	123613881	-	11
chr3	128067526	128067558	+	11
chr3	128813500	128813558	+	11
chr3	156543184	156543216	-	11
chr3	196814518	196814560	+	11
chr4	499338	499355	+	11
chr4	1832827	1832863	-	11
chr4	93155037	93155055	+	11
chr5	72206358	72206381	+	11
chr5	72208920	72208974	+	11
chr5	134605912	134605933	-	11
chr5	136044077	136044104	+	11
chr5	136046845	136046901	+	11
chr5	136063382	136063449	+	11
chr5	140117542	140117564	+	11
chr5	150795982	150796012	+	11
chr5	151662482	151662568	-	11
chr5	176658359	176658396	+	11
chr5	179730348	179730378	+	11
chr5	179836826	179836862	+	11
chr6	26104256	26104278	+	11
chr6	28589367	28589385	+	11
chr6	30725159	30725177	+	11
chr6	33305167	33305208	-	11
chr6	43785974	43786002	+	11
chr6	43786011	43786052	+	11
chr6	73783789	73783820	+	11
chr7	44213956	44213998	+	11
chr7	44572912	44572943	-	11
chr7	63925823	63925840	-	11
chr7	73536426	73536445	-	11
chr7	94424341	94424392	+	11
chr7	101137818	101137838	+	11
chr7	116559541	116559590	+	11
chr7	116560196	116560250	+	11
chr7	128748707	128748741	+	11
chr7	128848674	128848695	+	11
chr7	128858527	128858614	+	11
chr8	30785831	30785869	-	11
chr8	42546518	42546546	+	11
chr8	61684157	61684189	-	11
chr8	61714463	61714543	-	11
chr8	70583717	70583751	-	11
chr8	118412402	118412419	-	11
chr9	6506736	6506770	+	11
chr9	35057039	35057064	-	11
chr9	35725628	35725657	-	11
chr9	104831790	104831813	-	11
chr9	130222715	130222739	+	11
chr9	130232997	130233029	+	11
chr9	130233331	130233374	+	11
chr9	133361892	133361942	-	11
chrM	4871	4900	+	11
chrM	5111	5148	+	11
chrX	41344270	41344322	+	11
chrX	105902039	105902057	+	11
chrX	145727187	145727204	-	11
chrX	150768364	150768392	-	11
chrX	151407297	151407316	+	11
chrX	154018304	154018362	-	11
chr1	1786304	1786321	-	10
chr1	11022247	11022289	+	10
chr1	20483104	20483138	-	10
chr1	28200771	28200788	-	10
chr1	28621951	28622035	-	10
chr1	32775342	32775395	-	10
chr1	33324401	33324444	-	10
chr1	35184438	35184467	-	10
chr1	40293359	40293402	+	10
chr1	43164685	43164742	-	10
chr1	51973398	51973426	+	10
chr1	110343717	110343741	+	10
chr1	119914222	119914262	-	10
chr1	119914701	119914749	-	10
chr1	119914919	119914955	-	10
chr1	165911014	165911045	+	10
chr1	206734093	206734116	+	10
chr1	207761403	207761427	+	10
chr1	210374204	210374234	-	10
chr1	234606039	234606083	-	10
chr10	96521413	96521463	-	10
chr10	102657643	102657683	+	10
chr10	110511036	110511082	+	10
chr11	10802326	10802399	-	10
chr11	12938269	12938294	+	10
chr11	18407172	18407208	+	10
chr11	35221650	35221668	+	10
chr11	64204345	64204403	+	10
chr11	64244927	64244954	-	10
chr11	65546545	65546567	-	10
chr11	65892832	65892860	-	10
chr11	66276908	66276933	+	10
chr11	67398346	67398393	-	10
chr11	69652074	69652097	+	10
chr11	69654299	69654344	+	10
chr11	69654356	69654379	+	10
chr11	77665473	77665491	-	10
chr11	118897190	118897236	-	10
chr12	2803655	2803703	+	10
chr12	6537904	6537945	+	10
chr12	8941622	8941662	-	10
chr12	16364105	16364132	+	10
chr12	24811747	24811800	-	10
chr12	47965878	47965922	+	10
chr12	53041970	53042015	+	10
chr12	54233378	54233411	-	10
chr12	55726191	55726229	-	10
chr12	57193173	57193228	+	10
chr12	57195015	57195045	+	10
chr12	76028324	76028352	-	10
chr12	76028594	76028641	-	10
chr12	104321175	104321231	+	10
chr12	108646567	108646620	-	10
chr12	112508237	112508264	+	10
chr13	45341171	45341193	-	10
chr13	98022138	98022199	+	10
chr13	113323274	113323352	+	10
chr14	22846213	22846247	+	10
chr14	52640153	52640175	-	10
chr14	54427126	54427148	-	10
chr14	55671784	55671811	+	10
chr14	75134482	75134510	-	10
chr14	96566932	96566990	+	10
chr14	101987493	101987550	+	10
chr14	102000979	102001004	+	10
chr14	102084788	102084855	-	10
chr15	32731846	32731886	+	10
chr15	41561247	41561277	+	10
chr15	52550715	52550744	-	10
chr15	58595753	58595783	-	10
chr15	72199076	72199127	-	10
chr16	9103639	9103675	+	10
chr16	18806166	18806185	-	10
chr16	55505883	55505940	+	10
chr16	57042249	57042266	+	10
chr16	84054273	84054324	-	10
chr17	4167017	4167070	-	10
chr17	4980242	4980294	-	10
chr17	18209369	18209424	+	10
chr17	28645027	28645064	-	10
chr17	42402889	42402927	-	10
chr17	50056546	50056586	+	10
chr17	50064114	50064163	+	10
chr17	50189446	50189522	-	10
chr17	58490911	58490955	-	10
chr17	81512729	81512752	-	10
chr17	82239873	82239922	+	10
chr18	670707	670733	+	10
chr19	2430317	2430356	-	10
chr19	3976315	3976334	-	10
chr19	5787466	5787537	-	10
chr19	12939446	12939500	+	10
chr19	19505897	19505942	+	10
chr19	34428372	34428398	+	10
chr19	36140117	36140149	+	10
chr2	27050848	27050862	+	10
chr2	43011127	43011144	-	10
chr2	85321198	85321260	-	10
chr2	85597487	85597507	+	10
chr2	101839927	101839986	+	10
chr2	101891161	101891218	+	10
chr2	131049016	131049059	-	10
chr2	176201101	176201147	-	10
chr2	177042407	177042424	-	10
chr2	182978851	182978913	-	10
chr2	215361275	215361308	-	10
chr2	215414874	215414923	-	10
chr2	215435946	215435995	-	10
chr2	229358173	229358214	-	10
chr2	230879080	230879110	+	10
chr2	235797819	235797866	+	10
chr2	237324353	237324394	-	10
chr2	237325627	237325645	-	10
chr20	3805293	3805313	+	10
chr20	34072098	34072149	+	10
chr20	35557222	35557241	+	10
chr20	35626581	35626616	-	10
chr20	36046884	36046915	-	10
chr20	36779913	36779969	-	10
chr20	59038494	59038534	-	10
chr20	62388311	62388336	+	10
chr21	25881388	25881428	-	10
chr21	44850769	44850790	-	10
chr22	32387878	32387920	-	10
chr22	36304027	36304049	-	10
chr22	36305075	36305108	-	10
chr22	36320296	36320342	-	10
chr22	37922113	37922152	+	10
chr22	50197868	50197901	+	10
chr3	45677523	45677551	+	10
chr3	98593483	98593521	-	10
chr3	98796734	98796773	-	10
chr3	98798291	98798363	-	10
chr3	98799304	98799366	-	10
chr3	98881723	98881774	-	10
chr3	113721386	113721413	-	10
chr3	122426308	122426394	-	10
chr3	184180630	184180648	+	10
chr3	184322575	184322616	+	10
chr3	184335038	184335105	+	10
chr4	108620565	108620588	+	10
chr4	165342805	165342844	+	10
chr5	34831614	34831693	+	10
chr5	72206286	72206319	+	10
chr5	136063229	136063279	+	10
chr5	151663391	151663419	-	10
chr5	151804390	151804411	+	10
chr5	171900059	171900094	-	10
chr5	179800046	179800065	-	10
chr5	179836864	179836908	+	10
chr6	33780143	33780173	-	10
chr6	40396335	40396352	-	10
chr6	44251080	44251098	+	10
chr6	108223006	108223050	-	10
chr6	160109879	160109901	+	10
chr7	26192490	26192543	-	10
chr7	55198703	55198722	+	10
chr7	73687053	73687091	+	10
chr7	101138307	101138343	+	10
chr7	107919530	107919555	+	10
chr7	116560999	116561047	+	10
chr7	116797467	116797527	+	10
chr7	128769566	128769594	+	10
chr7	128770593	128770638	+	10
chr7	130497189	130497207	+	10
chr7	134968794	134968844	+	10
chr7	139565700	139565750	-	10
chr8	17962096	17962144	+	10
chr8	23328452	23328509	-	10
chr8	26410539	26410574	+	10
chr8	26412592	26412647	+	10
chr8	116846517	116846553	-	10
chr9	35062103	35062129	-	10
chr9	35712011	35712037	-	10
chr9	37863536	37863566	+	10
chr9	73170280	73170317	+	10
chr9	98015586	98015628	+	10
chr9	101563039	101563063	+	10
chr9	104783120	104783170	-	10
chr9	115030262	115030310	-	10
chr9	127506662	127506695	-	10
chr9	133362823	133362862	-	10
chrM	1968	1998	+	10
chrM	3987	4030	+	10
chrM	11073	11096	+	10
chrM	11836	11881	+	10
chrM	15555	15586	+	10
chrX	23786028	23786085	+	10
chrX	48577459	48577503	+	10
chrX	65740910	65740966	+	10
chrX	78103797	78103820	+	10
chrX	151407317	151407347	+	10
chrX	154011162	154011205	-	10
chrX	154349736	154349759	-	10
chrX	154352340	154352387	-	10
chrX	154360477	154360501	-	10
chr1	944418	944449	-	9
chr1	1785410	1785471	-	9
chr1	1786166	1786189	-	9
chr1	24841427	24841454	+	9
chr1	32773840	32773864	+	9
chr1	84671279	84671316	-	9
chr1	112701388	112701413	-	9
chr1	113974408	113974442	+	9
chr1	114733742	114733815	-	9
chr1	114749887	114749938	-	9
chr1	119923643	119923665	-	9
chr1	119923671	119923700	-	9
chr1	144560819	144560838	-	9
chr1	151404927	151404968	-	9
chr1	153535945	153535976	-	9
chr1	156263493	156263557	-	9
chr1	179844780	179844809	-	9
chr1	201820986	201821010	+	9
chr1	203682743	203682761	+	9
chr1	228493920	228493940	+	9
chr1	234606549	234606570	-	9
chr10	12035429	12035449	-	9
chr10	17229750	17229785	+	9
chr10	71817360	71817402	-	9
chr10	74119287	74119310	+	9
chr10	86437545	86437583	-	9
chr10	86499743	86499778	-	9
chr10	101781480	101781534	-	9
chr10	126017054	126017089	-	9
chr11	18396901	18396970	+	9
chr11	18407229	18407259	+	9
chr11	43344010	43344029	+	9
chr11	44619964	44620011	+	9
chr11	62516260	62516303	-	9
chr11	62525714	62525748	-	9
chr11	62625741	62625763	-	9
chr11	62881250	62881268	+	9
chr11	65505805	65505843	+	9
chr11	65858155	65858193	-	9
chr11	69653124	69653159	+	9
chr11	70435598	70435658	+	9
chr11	119018316	119018349	-	9
chr12	13214770	13214793	+	9
chr12	13216336	13216372	+	9
chr12	26999618	26999642	-	9
chr12	49273007	49273032	+	9
chr12	49763476	49763518	+	9
chr12	108646309	108646378	-	9
chr12	110731860	110731897	-	9
chr12	112508155	112508174	+	9
chr12	118144868	118144909	+	9
chr12	120222567	120222586	-	9
chr12	120222589	120222620	-	9
chr12	120700361	120700384	+	9
chr12	123034624	123034662	-	9
chr13	45336958	45337001	-	9
chr13	70024122	70024139	-	9
chr13	98021890	98021916	+	9
chr14	21269409	21269434	-	9
chr14	22847248	22847278	+	9
chr14	55065528	55065561	+	9
chr14	55673192	55673212	+	9
chr14	61795234	61795307	+	9
chr14	75133137	75133165	-	9
chr14	90404879	90404913	+	9
chr14	93293987	93294007	-	9
chr14	96565197	96565229	+	9
chr14	102083120	102083166	-	9
chr14	104940814	104940843	-	9
chr14	104940947	104940974	-	9
chr14	104954425	104954464	-	9
chr15	63325596	63325676	-	9
chr15	72200575	72200615	-	9
chr16	21625070	21625108	+	9
chr16	31112195	31112219	+	9
chr16	55485677	55485728	+	9
chr16	56608574	56608619	+	9
chr16	58163727	58163764	-	9
chr16	58547633	58547669	-	9
chr16	74296901	74296928	+	9
chr16	74462563	74462592	-	9
chr17	1004410	1004439	-	9
chr17	4999844	4999869	+	9
chr17	7460907	7460944	-	9
chr17	17150135	17150161	+	9
chr17	17812371	17812405	-	9
chr17	18208693	18208716	+	9
chr17	32370028	32370046	+	9
chr17	38853070	38853089	-	9
chr17	42403347	42403387	-	9
chr17	42842027	42842046	+	9
chr17	43211208	43211237	+	9
chr17	44851175	44851228	-	9
chr17	47678138	47678174	+	9
chr17	47684258	47684281	+	9
chr17	50089648	50089686	+	9
chr17	50194133	50194157	-	9
chr17	54962751	54962790	-	9
chr17	59647545	59647597	+	9
chr17	81860444	81860479	-	9
chr17	81868176	81868197	-	9
chr17	81868911	81868974	-	9
chr17	82442760	82442796	-	9
chr18	9400411	9400479	+	9
chr19	3468643	3468689	+	9
chr19	4838553	4838584	-	9
chr19	10486380	10486435	-	9
chr19	12745448	12745482	+	9
chr19	12944244	12944273	+	9
chr19	13135732	13135762	+	9
chr19	18307119	18307146	-	9
chr19	21821356	21821374	-	9
chr19	38729928	38729957	+	9
chr19	39433311	39433367	-	9
chr19	46920676	46920695	+	9
chr19	47000857	47000900	+	9
chr19	58388217	58388242	+	9
chr2	9414220	9414256	-	9
chr2	10802551	10802603	-	9
chr2	20202027	20202072	-	9
chr2	20447695	20447717	+	9
chr2	27243575	27243615	+	9
chr2	97648030	97648087	+	9
chr2	152637612	152637633	+	9
chr2	190969778	190969803	-	9
chr2	210433779	210433802	-	9
chr2	215375298	215375317	-	9
chr2	219180191	219180245	+	9
chr20	3650603	3650644	+	9
chr20	3805272	3805292	+	9
chr20	14966103	14966120	+	9
chr20	36048287	36048338	-	9
chr20	36778114	36778134	-	9
chr20	38090233	38090267	+	9
chr20	44906798	44906846	+	9
chr20	45326510	45326529	-	9
chr20	58360390	58360419	+	9
chr20	58445289	58445309	+	9
chr20	63741416	63741480	+	9
chr21	14372348	14372378	-	9
chr21	46004499	46004531	+	9
chr21	46120547	46120580	+	9
chr21	46125970	46126018	+	9
chr22	35393867	35393919	+	9
chr22	35394081	35394100	+	9
chr22	36288344	36288421	-	9
chr22	36312183	36312221	-	9
chr22	37225879	37225905	-	9
chr22	38861794	38861818	-	9
chr22	40330411	40330430	+	9
chr22	41245950	41245983	-	9
chr22	42070335	42070353	-	9
chr22	46686708	46686743	-	9
chr3	31636478	31636528	+	9
chr3	45224749	45224776	-	9
chr3	45225052	45225083	-	9
chr3	45677585	45677610	+	9
chr3	52533726	52533774	-	9
chr3	98796095	98796142	-	9
chr3	98798623	98798664	-	9
chr3	128070955	128070993	+	9
chr3	128620185	128620222	-	9
chr3	170091113	170091134	-	9
chr3	184306063	184306090	+	9
chr3	194405522	194405551	-	9
chr3	194431106	194431140	-	9
chr3	196049856	196049892	-	9
chr4	1953316	1953340	+	9
chr4	10088713	10088745	-	9
chr4	52028795	52028827	-	9
chr4	75643847	75643864	-	9
chr4	76160619	76160681	-	9
chr5	53092630	53092661	+	9
chr5	72208720	72208786	+	9
chr5	137752822	137752844	-	9
chr5	150795652	150795673	+	9
chr5	151662834	151662852	-	9
chr5	177303940	177303997	+	9
chr5	179722873	179722896	+	9
chr5	179729305	179729339	+	9
chr5	179730279	179730327	+	9
chr6	28589387	28589418	+	9
chr6	43179749	43179786	+	9
chr6	43770248	43770312	+	9
chr6	132814993	132815077	+	9
chr6	134133778	134133795	+	9
chr6	149789962	149790010	+	9
chr6	151356429	151356492	+	9
chr7	2379426	2379455	+	9
chr7	2730502	2730541	-	9
chr7	11013732	11013793	+	9
chr7	55470728	55470748	-	9
chr7	94394882	94394927	+	9
chr7	116560342	116560405	+	9
chr7	128769716	128769747	+	9
chr7	128858876	128858913	+	9
chr7	128859184	128859220	+	9
chr7	130166173	130166195	-	9
chr7	139568499	139568546	-	9
chr7	139568640	139568672	-	9
chr7	139571197	139571217	-	9
chr7	157268223	157268273	+	9
chr8	11848066	11848100	-	9
chr8	23843890	23843938	-	9
chr8	26411729	26411767	+	9
chr8	30653430	30653451	-	9
chr8	47773972	47774032	-	9
chr8	100919664	100919695	-	9
chr8	143811177	143811201	-	9
chr8	144789842	144789877	-	9
chr8	145054458	145054496	+	9
chr8	145054501	145054535	+	9
chr9	35099975	35099998	-	9
chr9	37861323	37861366	+	9
chr9	83660888	83660951	-	9
chr9	88475377	88475422	+	9
chr9	99142527	99142557	+	9
chr9	104783710	104783746	-	9
chr9	127506019	127506062	-	9
chr9	127506573	127506640	-	9
chr9	133363392	133363413	-	9
chrM	2658	2684	+	9
chrM	5297	5319	+	9
chrM	9474	9518	+	9
chrM	10555	10606	+	9
chrM	12344	12360	+	9
chrM	13314	13380	+	9
chrM	13715	13751	+	9
chrM	14088	14119	+	9
chrX	12976959	12976999	+	9
chrX	12977013	12977053	+	9
chrX	41136811	41136849	+	9
chrX	74533126	74533189	+	9
chrX	103330266	103330284	+	9
chrX	154011758	154011806	-	9
chrX	154018054	154018083	-	9
chrX	154353091	154353119	-	9
chrX	154359491	154359511	-	9
chr1	1338597	1338628	-	8
chr1	1495707	1495731	+	8
chr1	1785779	1785820	-	8
chr1	1785921	1785953	-	8
chr1	6591367	6591401	-	8
chr1	6591969	6592015	-	8
chr1	6592280	6592326	-	8
chr1	8012653	8012696	-	8
chr1	16443703	16443720	+	8
chr1	19339217	19339269	-	8
chr1	24843075	24843107	+	8
chr1	34089006	34089053	-	8
chr1	36348765	36348784	-	8
chr1	44650851	44650891	+	8
chr1	51399027	51399044	-	8
chr1	109317941	109317972	-	8
chr1	109426349	109426374	-	8
chr1	110233315	110233336	+	8
chr1	112670141	112670183	+	8
chr1	112701655	112701690	-	8
chr1	145856937	145856974	-	8
chr1	150965512	150965561	-	8
chr1	150966038	150966057	-	8
chr1	153607196	153607246	-	8
chr1	155882296	155882315	+	8
chr1	156139937	156139971	+	8
chr1	156742368	156742441	-	8
chr1	156742538	156742562	-	8
chr1	156742923	156742945	-	8
chr1	170736882	170736919	+	8
chr1	182884733	182884772	+	8
chr1	183023422	183023470	+	8
chr1	183143338	183143384	+	8
chr1	200409952	200409972	-	8
chr1	206733321	206733360	+	8
chr1	208028006	208028026	-	8
chr1	225496003	225496038	-	8
chr1	225789415	225789471	+	8
chr1	228098272	228098325	+	8
chr1	228493875	228493903	+	8
chr1	230280262	230280290	+	8
chr10	17229500	17229543	+	8
chr10	17233611	17233633	+	8
chr10	28533644	28533661	+	8
chr10	32929943	32929971	-	8
chr10	73051071	73051095	-	8
chr10	73249632	73249657	-	8
chr10	102163758	102163813	+	8
chr10	122489433	122489456	+	8
chr11	812799	812820	+	8
chr11	8988182	8988203	-	8
chr11	12263102	12263162	+	8
chr11	18394586	18394638	+	8
chr11	18402884	18402904	+	8
chr11	35229988	35230024	+	8
chr11	35230866	35230906	+	8
chr11	35232024	35232069	+	8
chr11	35232240	35232266	+	8
chr11	46434936	46434957	-	8
chr11	59551744	59551762	+	8
chr11	60850830	60850897	+	8
chr11	61965068	61965087	-	8
chr11	62525049	62525075	-	8
chr11	62532912	62532943	-	8
chr11	62625402	62625423	-	8
chr11	65499903	65499939	+	8
chr11	65500427	65500480	+	8
chr11	65502448	65502487	+	8
chr11	65503933	65503956	+	8
chr11	65573955	65574010	+	8
chr11	65891352	65891408	+	8
chr11	65893053	65893107	-	8
chr11	69643942	69643976	+	8
chr11	69651975	69652026	+	8
chr11	69652424	69652456	+	8
chr11	69652734	69652761	+	8
chr11	70435793	70435847	+	8
chr11	76550833	76550850	+	8
chr11	120485815	120485836	+	8
chr11	120486251	120486295	+	8
chr11	123062080	123062121	-	8
chr11	126277796	126277832	+	8
chr12	1494014	1494043	+	8
chr12	6666863	6666896	-	8
chr12	6968490	6968525	-	8
chr12	46185938	46185971	-	8
chr12	49131386	49131406	-	8
chr12	49265105	49265181	+	8
chr12	49764223	49764243	+	8
chr12	49764524	49764567	+	8
chr12	53097708	53097771	+	8
chr12	53479418	53479463	+	8
chr12	54403917	54403967	-	8
chr12	55726935	55726971	-	8
chr12	56645916	56645967	-	8
chr12	57183381	57183416	+	8
chr12	57210868	57210885	+	8
chr12	57211489	57211520	+	8
chr12	76028799	76028829	-	8
chr12	103942623	103942663	+	8
chr12	108647058	108647099	-	8
chr12	110339588	110339613	+	8
chr12	112382357	112382374	-	8
chr12	112508400	112508480	+	8
chr12	120697817	120697850	+	8
chr12	120700447	120700473	+	8
chr12	131922873	131922906	+	8
chr13	45340738	45340762	-	8
chr13	48261428	48261476	+	8
chr13	76882775	76882795	-	8
chr13	98014057	98014075	+	8
chr14	22845866	22845886	+	8
chr14	22846291	22846337	+	8
chr14	22847022	22847050	+	8
chr14	22847313	22847341	+	8
chr14	31106944	31107011	-	8
chr14	54427343	54427378	-	8
chr14	54940725	54940773	-	8
chr14	61732411	61732439	+	8
chr14	70031661	70031679	+	8
chr14	71102111	71102145	+	8
chr14	73713585	73713625	-	8
chr14	75132613	75132666	-	8
chr14	90404718	90404775	+	8
chr14	90404980	90405039	+	8
chr14	92162918	92162936	+	8
chr14	96089754	96089780	+	8
chr14	102000015	102000040	+	8
chr14	104940668	104940705	-	8
chr15	31376331	31376370	+	8
chr15	34095926	34095987	-	8
chr15	51911048	51911077	+	8
chr15	52550612	52550631	-	8
chr15	61878725	61878742	-	8
chr15	63323728	63323775	-	8
chr15	63324054	63324077	-	8
chr15	66490992	66491014	+	8
chr15	66502661	66502697	-	8
chr15	72199529	72199563	-	8
chr15	72199635	72199681	-	8
chr15	72207217	72207244	-	8
chr15	72209793	72209828	-	8
chr15	72219082	72219116	-	8
chr16	9117820	9117870	+	8
chr16	11762689	11762719	-	8
chr16	28156429	28156467	-	8
chr16	28177279	28177311	-	8
chr16	28211428	28211454	-	8
chr16	28842831	28842861	-	8
chr16	55483003	55483049	+	8
chr16	55505346	55505391	+	8
chr16	55506008	55506040	+	8
chr16	56429515	56429568	-	8
chr16	67198431	67198488	+	8
chr16	67198702	67198721	+	8
chr16	70159646	70159680	+	8
chr16	75093559	75093588	+	8
chr16	82626959	82626985	+	8
chr16	84665706	84665753	+	8
chr17	7312001	7312027	+	8
chr17	7461099	7461135	-	8
chr17	7461295	7461327	-	8
chr17	7463566	7463620	-	8
chr17	13494137	13494170	-	8
chr17	15408562	15408589	+	8
chr17	18208836	18208882	+	8
chr17	18325018	18325061	+	8
chr17	38920001	38920059	+	8
chr17	40417816	40417841	-	8
chr17	42314309	42314343	-	8
chr17	44075352	44075381	+	8
chr17	45106801	45106871	+	8
chr17	47650376	47650432	+	8
chr17	47682610	47682637	+	8
chr17	48060406	48060444	+	8
chr17	50064563	50064581	+	8
chr17	50072130	50072168	+	8
chr17	50076332	50076377	+	8
chr17	50089239	50089271	+	8
chr17	50089272	50089340	+	8
chr17	50189173	50189220	-	8
chr17	50191850	50191889	-	8
chr17	50194380	50194405	-	8
chr17	50382283	50382315	-	8
chr17	58090258	58090323	+	8
chr17	75778501	75778573	-	8
chr17	76265423	76265452	+	8
chr17	76387201	76387258	+	8
chr17	76680364	76680394	-	8
chr17	78224552	78224587	+	8
chr17	78370974	78370991	-	8
chr17	78991954	78991976	-	8
chr17	81512257	81512289	-	8
chr17	81843198	81843250	-	8
chr17	81843525	81843561	-	8
chr17	81890791	81890824	-	8
chr17	82083797	82083845	-	8
chr17	82621737	82621780	-	8
chr18	23482945	23482970	+	8
chr18	25818455	25818490	-	8
chr18	46086384	46086416	-	8
chr18	51078637	51078658	+	8
chr18	56753254	56753272	-	8
chr18	68674711	68674741	-	8
chr19	811061	811099	+	8
chr19	1383581	1383606	+	8
chr19	2430463	2430496	-	8
chr19	2434036	2434070	-	8
chr19	3977337	3977357	-	8
chr19	3979421	3979445	-	8
chr19	4859978	4860005	-	8
chr19	10133590	10133608	-	8
chr19	12939159	12939200	+	8
chr19	12944116	12944142	+	8
chr19	15237732	15237762	-	8
chr19	16076520	16076548	+	8
chr19	16102131	16102169	+	8
chr19	16102699	16102759	+	8
chr19	32584963	32584990	+	8
chr19	38729882	38729911	+	8
chr19	41261109	41261139	+	8
chr19	41344781	41344811	-	8
chr19	54179957	54179982	-	8
chr19	58393435	58393461	+	8
chr2	9584637	9584684	-	8
chr2	20201677	20201722	-	8
chr2	28415010	28415037	+	8
chr2	54649800	54649856	+	8
chr2	54972566	54972609	-	8
chr2	54987602	54987621	-	8
chr2	85318918	85318941	-	8
chr2	112531027	112531085	+	8
chr2	113957775	113957812	+	8
chr2	128164752	128164807	+	8
chr2	131052042	131052074	-	8
chr2	157736944	157736963	-	8
chr2	160274674	160274712	-	8
chr2	162033603	162033661	-	8
chr2	168774709	168774742	+	8
chr2	200830024	200830041	+	8
chr2	206305584	206305619	+	8
chr2	215367903	215367942	-	8
chr2	215376616	215376680	-	8
chr2	215425254	215425291	-	8
chr2	224765594	224765617	-	8
chr2	229358236	229358286	-	8
chr2	237324090	237324120	-	8
chr2	237339065	237339089	-	8
chr2	237361816	237361833	-	8
chr2	237368642	237368659	-	8
chr2	237381015	237381047	-	8
chr2	237381359	237381398	-	8
chr2	241248076	241248116	-	8
chr2	241353351	241353400	+	8
chr2	241353833	241353884	+	8
chr20	4700487	4700508	+	8
chr20	32166704	32166746	+	8
chr20	36048012	36048039	-	8
chr20	43710007	43710038	+	8
chr20	47655622	47655642	+	8
chr20	58903715	58903752	+	8
chr20	58910949	58910979	+	8
chr21	8213321	8213344	+	8
chr21	25880993	25881019	-	8
chr21	25911838	25911871	-	8
chr21	33549978	33550046	+	8
chr21	34791412	34791445	-	8
chr21	37514013	37514052	+	8
chr21	41885217	41885252	-	8
chr21	46002622	46002679	+	8
chr21	46003918	46003945	+	8
chr22	36281479	36281544	-	8
chr22	36293788	36293828	-	8
chr22	36309322	36309349	-	8
chr22	36348905	36348931	-	8
chr22	41246452	41246478	-	8
chr22	41434598	41434641	-	8
chr22	50456221	50456242	-	8
chr3	10126556	10126587	+	8
chr3	27409373	27409439	-	8
chr3	31636563	31636619	+	8
chr3	31636728	31636769	+	8
chr3	33142919	33142975	+	8
chr3	45689001	45689033	-	8
chr3	49117804	49117829	-	8
chr3	52524815	52524840	-	8
chr3	52525206	52525226	-	8
chr3	55468455	55468481	-	8
chr3	97972357	97972401	-	8
chr3	98796776	98796820	-	8
chr3	98798718	98798751	-	8
chr3	98800618	98800640	-	8
chr3	98849500	98849533	-	8
chr3	113719566	113719605	-	8
chr3	113720865	113720898	-	8
chr3	113721348	113721369	-	8
chr3	120329007	120329028	-	8
chr3	120329109	120329169	-	8
chr3	120331212	120331239	-	8
chr3	124796537	124796562	-	8
chr3	128071041	128071066	+	8
chr3	136854702	136854735	+	8
chr3	149517580	149517605	-	8
chr3	156542891	156542910	-	8
chr3	169994514	169994562	+	8
chr3	184315378	184315404	+	8
chr3	184327914	184327970	+	8
chr3	194405571	194405610	-	8
chr4	2929344	2929371	+	8
chr4	6641813	6641843	+	8
chr4	6641895	6641920	+	8
chr4	6641921	6641952	+	8
chr4	7762290	7762308	-	8
chr4	87983138	87983189	+	8
chr4	139509516	139509534	-	8
chr4	139509557	139509574	-	8
chr4	174262766	174262784	-	8
chr4	186588044	186588061	-	8
chr5	5461216	5461259	+	8
chr5	14487646	14487669	+	8
chr5	16474016	16474051	-	8
chr5	17275940	17276005	+	8
chr5	72205589	72205613	+	8
chr5	72208151	72208172	+	8
chr5	72208200	72208237	+	8
chr5	74628881	74628915	-	8
chr5	80142224	80142247	-	8
chr5	96773393	96773421	+	8
chr5	103029105	103029142	+	8
chr5	136028999	136029036	+	8
chr5	143281360	143281391	-	8
chr5	150795762	150795780	+	8
chr5	154815588	154815618	+	8
chr5	179836445	179836470	+	8
chr5	180301250	180301309	-	8
chr5	181188481	181188498	-	8
chr6	7289253	7289311	-	8
chr6	18225599	18225636	-	8
chr6	27479664	27479681	+	8
chr6	30724402	30724457	+	8
chr6	52277554	52277574	-	8
chr6	56601518	56601537	-	8
chr6	56640032	56640064	-	8
chr6	73824798	73824852	+	8
chr6	149410591	149410623	+	8
chr6	151305746	151305768	+	8
chr7	2731029	2731086	-	8
chr7	25123334	25123353	-	8
chr7	26192036	26192103	-	8
chr7	26192223	26192272	-	8
chr7	26200626	26200670	-	8
chr7	44213621	44213641	+	8
chr7	50590844	50590888	-	8
chr7	50592549	50592572	-	8
chr7	74121625	74121657	+	8
chr7	74121742	74121808	+	8
chr7	74121821	74121860	+	8
chr7	76328609	76328637	-	8
chr7	94427020	94427058	+	8
chr7	101137622	101137639	+	8
chr7	101137717	101137757	+	8
[truncated: 15,181 more rows]

## Sheet: Dataset S3
Chromosome	Start	End	Strand	Peak Score
chr7	5527484	5527516	-	3293
chr5	179614717	179614735	-	780
chrX	78126079	78126101	+	625
chr14	49586782	49586839	+	504
chr17	1400078	1400097	-	493
chrX	53462197	53462215	+	454
chr5	138934168	138934189	+	355
chr14	55684220	55684239	+	260
chr2	112646916	112646937	+	253
chr19	38729968	38730006	+	241
chr15	74409994	74410027	-	218
chr17	81510327	81510388	-	210
chr11	840292	840381	-	206
chr16	55484058	55484121	+	204
chr2	237334685	237334703	-	201
chr7	76327134	76327182	-	192
chr6	7289372	7289413	-	178
chr14	101986536	101986571	+	164
chr11	70436271	70436294	+	160
chr15	72199224	72199329	-	160
chr1	154214504	154214530	-	158
chr1	149692868	149692886	-	154
chr1	8867203	8867258	-	152
chr5	140726158	140726191	+	152
chr2	200478266	200478304	+	146
chr11	69652965	69652989	+	139
chr15	69453663	69453695	+	139
chr6	133837317	133837348	+	138
chr3	45224687	45224733	-	136
chr3	113720429	113720449	-	134
chr2	43467956	43467973	-	133
chr5	78476608	78476626	+	130
chr11	35230664	35230687	+	129
chr2	46356745	46356769	+	129
chr2	218274365	218274385	-	129
chrX	78126109	78126150	+	127
chr6	122444831	122444867	-	123
chr1	231422312	231422329	-	121
chr7	116560157	116560261	+	121
chr14	61795064	61795159	+	120
chr12	49764096	49764135	+	119
chr17	39531389	39531420	+	119
chr2	203427922	203427954	+	119
chr5	181241611	181241642	-	119
chr1	28200928	28200954	-	118
chr16	71928388	71928415	+	116
chr17	50074218	50074274	+	114
chr2	203427965	203427990	+	114
chr17	50201540	50201581	-	111
chr10	102480063	102480093	-	110
chr3	86946327	86946347	-	110
chr1	31497670	31497691	-	107
chr7	94394961	94395002	+	107
chr8	56074064	56074107	-	107
chr15	89335089	89335116	+	106
chr8	47773819	47773838	-	105
chr11	61967460	61967502	-	104
chr2	54987638	54987690	-	104
chr3	123613906	123613929	-	104
chr11	70436310	70436336	+	103
chr19	1435076	1435099	+	103
chr15	64155920	64155994	-	102
chr1	201969898	201969919	+	101
chr16	87384047	87384076	-	101
chr11	110231103	110231132	-	100
chr14	102081329	102081436	-	99
chr4	77075701	77075745	-	99
chrX	41348464	41348505	+	98
chr1	113895386	113895426	-	97
chr2	108685773	108685810	+	96
chr14	73588852	73588872	-	95
chr3	156540952	156540984	-	95
chr11	35232148	35232231	+	94
chr12	56644839	56644917	-	94
chr17	50194350	50194449	-	94
chr7	135927673	135927693	-	94
chr11	69653002	69653059	+	92
chr2	234494969	234494991	-	92
chr12	49764066	49764092	+	91
chr2	219289960	219289980	-	91
chr3	179588286	179588306	+	91
chr10	32911908	32911969	-	90
chr15	63071699	63071750	+	90
chr16	67438399	67438440	-	90
chr11	65890662	65890681	+	88
chr14	49853869	49853887	-	88
chr14	96566211	96566238	+	88
chr17	28860826	28860871	+	88
chr2	26135873	26135947	+	88
chr7	135927624	135927665	-	88
chr2	63891283	63891327	+	87
chr7	128769789	128769851	+	87
chrX	78103852	78104038	+	86
chr1	27405830	27405860	-	85
chr10	32911600	32911676	-	85
chr10	77637536	77637559	-	85
chr14	22846469	22846521	+	85
chr5	96774463	96774487	+	85
chr5	136063606	136063687	+	85
chr17	75248391	75248408	-	84
chr2	112663167	112663222	+	84
chr2	237341106	237341155	-	84
chr11	65900249	65900363	-	83
chr12	122865859	122865917	-	82
chr14	22565030	22565100	-	82
chr20	44499692	44499717	-	82
chr6	28478673	28478692	-	82
chr12	57181199	57181267	+	81
chr2	234494935	234494958	-	81
chr22	41246378	41246412	-	81
chr6	136259154	136259177	-	81
chr14	68884253	68884293	-	80
chr15	74410497	74410548	-	79
chr5	136063473	136063503	+	79
chr2	27051241	27051267	+	78
chr3	31636633	31636674	+	77
chr8	11847074	11847138	-	77
chr8	61684077	61684125	-	76
chr1	119929093	119929171	-	75
chr13	98018586	98018617	+	75
chr1	201969858	201969888	+	74
chr2	215383458	215383483	-	74
chr14	49853797	49853825	-	73
chr3	98799820	98799839	-	73
chr3	127691240	127691277	-	73
chr15	52550747	52550773	-	72
chr1	183144274	183144366	+	71
chr11	35221701	35221725	+	71
chr2	10129589	10129609	+	71
chr1	225402249	225402285	-	70
chr19	45478640	45478661	-	70
chr10	71817360	71817469	-	69
chr12	6968465	6968513	-	69
chr14	96566183	96566204	+	69
chr1	1786325	1786383	-	68
chr1	222733703	222733766	+	68
chr11	62630196	62630249	-	68
chr3	52533618	52533704	-	68
chr3	98799793	98799812	-	68
chrX	123908111	123908165	+	68
chr10	32894987	32895008	-	67
chr19	12939504	12939525	+	67
chr4	26431866	26431925	+	67
chr5	151808631	151808657	+	67
chr1	28200976	28200995	-	66
chr14	102085349	102085391	-	66
chr19	2233717	2233748	-	66
chr20	31606415	31606442	+	66
chr3	30692803	30692830	+	66
chr5	17276226	17276259	+	66
chr5	151808584	151808614	+	66
chr7	76328543	76328635	-	66
chr1	20485562	20485594	-	65
chr14	70031768	70031794	+	65
chr16	71928416	71928441	+	65
chr10	17233765	17233893	+	64
chr10	86437512	86437532	-	64
chr10	126017095	126017187	-	64
chr17	28648655	28648705	-	64
chr17	44803445	44803468	-	64
chr4	152400579	152400618	-	64
chrX	151409212	151409284	+	64
chr4	165342764	165342868	+	63
chr2	118108800	118108819	+	62
chr2	218959723	218959742	+	62
chr6	151355791	151355832	+	62
chr1	8012413	8012442	-	61
chr1	205714663	205714724	-	61
chr11	35229903	35229938	+	61
chrX	78126267	78126305	+	61
chr10	74119247	74119270	+	60
chr15	44717659	44717767	+	60
chr17	81681437	81681463	-	60
chr3	113720400	113720425	-	60
chr1	100976194	100976220	+	59
chr12	49129545	49129594	-	59
chr2	10129557	10129579	+	59
chr3	141447880	141447907	+	59
chr3	196050126	196050183	-	59
chr7	44213616	44213676	+	59
chr7	99419482	99419511	+	59
chr7	139566597	139566636	-	59
chr1	55081319	55081381	-	58
chr11	35229946	35229972	+	58
chr12	106237922	106237982	-	58
chr2	187465020	187465072	-	58
chr20	36049675	36049705	-	58
chr1	119914399	119914453	-	57
chr11	61965089	61965118	-	57
chr13	98021852	98021911	+	57
chr7	99419533	99419560	+	57
chr1	167765669	167765691	+	56
chr11	18405524	18405546	+	56
chr3	30693722	30693766	+	56
chr9	128917304	128917408	+	56
chr12	120701036	120701065	+	55
chr13	76882563	76882632	-	55
chr14	60124739	60124803	+	55
chr15	56029856	56029875	-	55
chr16	1700987	1701060	+	55
chr17	76679724	76679743	-	55
chr3	179588235	179588268	+	55
chr5	136063510	136063586	+	55
chr5	151663070	151663110	-	55
chr8	61625866	61626007	-	55
chr11	35230525	35230545	+	54
chr12	49764743	49764842	+	54
chr2	109301902	109301919	+	54
chr22	35739342	35739377	-	54
chrX	154018085	154018120	-	54
chr10	17235161	17235252	+	53
chr11	63625064	63625105	-	53
chr2	54973053	54973134	-	53
chr9	35657936	35657992	-	53
chr11	62529233	62529293	-	52
chr11	69654146	69654269	+	52
chr12	6531748	6531789	+	52
chr12	110731816	110731848	-	52
chr14	22920659	22920681	-	52
chr15	60347418	60347445	-	52
chr22	35739381	35739414	-	52
chr5	151804732	151804853	+	52
chr6	151355836	151355869	+	52
chr13	98022004	98022042	+	51
chr15	72209733	72209759	-	51
chr17	66806019	66806066	+	51
chr3	157443177	157443203	+	51
chr7	2730187	2730230	-	51
chr1	159141639	159141664	-	50
chr1	227193833	227193867	-	50
chr12	111447427	111447498	+	50
chr14	49853906	49853924	-	50
chr14	101986142	101986188	+	50
chr22	37675627	37675663	+	50
chr4	173331967	173332015	-	50
chr9	34637044	34637076	-	50
chr12	6731064	6731171	+	49
chr16	55505902	55506038	+	49
chr2	33389275	33389305	+	49
chr3	55467337	55467363	-	49
chr7	101137967	101137995	+	49
chr14	54420048	54420085	+	48
chr14	92142220	92142326	+	48
chr15	48415713	48415765	-	48
chr16	8855055	8855104	-	48
chr16	46674402	46674435	-	48
chr17	50187886	50187976	-	48
chr3	32481718	32481796	-	48
chr5	122064986	122065119	-	48
chr1	16396630	16396660	+	47
chr1	55068386	55068410	-	47
chr10	122514402	122514594	+	47
chr11	65896908	65896994	-	47
chr14	101987493	101987633	+	47
chr15	48613025	48613074	-	47
chr2	65087990	65088046	-	47
chr2	84906505	84906562	+	47
chr2	223975221	223975296	-	47
chr2	237334726	237334759	-	47
chr20	35949434	35949454	+	47
chr3	48468547	48468620	-	47
chr3	98798715	98798743	-	47
chr4	93155038	93155055	+	47
chr6	119177374	119177425	-	47
chr8	17962104	17962164	+	47
chrM	11223	11277	+	47
chr1	206733425	206733521	+	46
chr11	35231906	35231978	+	46
chr11	69652924	69652951	+	46
chr12	110339581	110339638	+	46
chr16	74774666	74774684	-	46
chrM	7642	7710	+	46
chr1	179844759	179844812	-	45
chr1	203742682	203742730	+	45
chr1	230280117	230280153	+	45
chr15	44717844	44717887	+	45
chr17	42403228	42403295	-	45
chr19	41260699	41260838	+	45
chr3	156542887	156542911	-	45
chr6	28643460	28643484	+	45
chr6	109368130	109368212	-	45
chrY	12273666	12273688	+	45
chr10	17229594	17229718	+	44
chr10	126017055	126017085	-	44
chr12	111447361	111447423	+	44
chr12	132772161	132772231	-	44
chr13	98519257	98519335	-	44
chr2	215361025	215361056	-	44
chr2	215386728	215386816	-	44
chr2	237352524	237352585	-	44
chr4	1900769	1900807	+	44
chr5	72206356	72206382	+	44
chrM	6183	6248	+	44
chrX	154349993	154350049	-	44
chr12	13215388	13215415	+	43
chr14	54427151	54427215	-	43
chr17	81510187	81510224	-	43
chr18	9860649	9860679	+	43
chr20	31801597	31801658	+	43
chr20	58360373	58360424	+	43
chr4	6642204	6642252	+	43
chr8	47773781	47773806	-	43
chr8	69922964	69922981	-	43
chr8	94250225	94250255	-	43
chr9	112687489	112687509	-	43
chrX	78104198	78104315	+	43
chr10	33254176	33254197	-	42
chr13	38361885	38361923	+	42
chr14	100334617	100334677	-	42
chr15	83016681	83016727	-	42
chr2	54972707	54972808	-	42
chr21	46125867	46125930	+	42
chr3	41240304	41240340	+	42
chr4	155347285	155347304	-	42
chr5	32602032	32602062	+	42
chr5	151804389	151804419	+	42
chr11	13729883	13729908	+	41
chr16	58521198	58521234	-	41
chr19	10691467	10691492	+	41
chr2	37228130	37228180	-	41
chr2	54972242	54972261	-	41
chr2	215419296	215419358	-	41
chr22	20949862	20949894	+	41
chr5	72909624	72909652	+	41
chr6	122456555	122456587	-	41
chr7	2380547	2380629	+	41
chrX	124037541	124037561	+	41
chr10	33256316	33256353	-	40
chr10	71821981	71822016	-	40
chr12	51242494	51242527	+	40
chr15	72217420	72217455	-	40
chr17	47684257	47684331	+	40
chr17	50191394	50191444	-	40
chr2	43011127	43011145	-	40
chr2	70280676	70280726	+	40
chr21	41993128	41993180	-	40
chr3	41240256	41240295	+	40
chr3	98798906	98798992	-	40
chr6	83164785	83164804	+	40
chr7	76327911	76327937	-	40
chr7	101137926	101137962	+	40
chr7	134969681	134969707	+	40
chr1	152032762	152032795	-	39
chr1	159918487	159918546	-	39
chr11	35231004	35231075	+	39
chr11	62516392	62516460	-	39
chr14	96566933	96567000	+	39
chr15	63071353	63071390	+	39
chr16	70159644	70159678	+	39
chr17	81868175	81868210	-	39
chr2	157736944	157736993	-	39
chr2	215367951	215367998	-	39
chr20	38092255	38092288	+	39
chr20	62139115	62139147	-	39
chr21	46121055	46121087	+	39
chr22	41246489	41246572	-	39
chr5	17276271	17276306	+	39
chr7	63925823	63925840	-	39
chr8	47904884	47904933	-	39
chr8	97726202	97726255	+	39
chr1	151983010	151983043	-	38
chr15	44717888	44718012	+	38
chr17	81510251	81510307	-	38
chr19	38730007	38730057	+	38
chr19	46610299	46610367	+	38
chr2	25975261	25975295	-	38
chr3	196829750	196829769	+	38
chr7	128769942	128770011	+	38
chr9	105365602	105365625	+	38
chr1	161422157	161422175	-	37
chr11	866911	866948	+	37
chr11	10802186	10802219	-	37
chr11	65854980	65855053	-	37
chr13	76882770	76882802	-	37
chr16	28135258	28135291	-	37
chr17	42403725	42403773	-	37
chr22	40827150	40827189	-	37
chr3	196814517	196814559	+	37
chr9	37863528	37863568	+	37
chr1	1786251	1786278	-	36
chr1	11056018	11056065	-	36
chr1	39563718	39563743	-	36
chr11	8988163	8988215	-	36
chr11	35221647	35221698	+	36
chr12	13215586	13215648	+	36
chr12	120198564	120198618	-	36
chr15	43771350	43771395	+	36
chr2	112646958	112646985	+	36
chr20	44511289	44511344	-	36
chr3	45224623	45224643	-	36
chr5	97032671	97032717	+	36
chr5	154815588	154815652	+	36
chr7	55470725	55470765	-	36
chr7	107919530	107919589	+	36
chr12	6534504	6534567	+	35
chr12	123596608	123596679	+	35
chr13	98018627	98018653	+	35
chr14	103341532	103341578	+	35
chr17	1361096	1361125	-	35
chr18	12310987	12311037	+	35
chr2	200817099	200817137	+	35
chr3	52528182	52528288	-	35
chr3	141447841	141447875	+	35
chr6	43785980	43786016	+	35
chr7	135675083	135675121	+	35
chr8	11844826	11844895	-	35
chr9	130854954	130854977	+	35
chrX	151407317	151407378	+	35
chr11	43344043	43344068	+	34
chr11	47466918	47466953	-	34
chr12	121347828	121347855	-	34
chr13	113510259	113510333	+	34
chr17	81510601	81510650	-	34
chr18	46088172	46088195	-	34
chr18	59328544	59328565	-	34
chr19	2430316	2430359	-	34
chr2	70277919	70277956	+	34
chr2	200478311	200478346	+	34
chr20	31514686	31514725	+	34
chr20	32334449	32334509	+	34
chr21	37202640	37202689	+	34
chr4	39551945	39552023	-	34
chr5	179729283	179729334	+	34
chrX	49071302	49071331	-	34
chr11	62881245	62881290	+	33
chr11	63625187	63625215	-	33
chr12	89603229	89603253	-	33
chr12	112507680	112507736	+	33
chr12	120694862	120694890	+	33
chr17	50201511	50201530	-	33
chr19	2101685	2101706	-	33
chr2	177042407	177042424	-	33
chr2	215384879	215384938	-	33
chr20	45426061	45426085	+	33
chr21	41887851	41887893	-	33
chr21	44849759	44849861	-	33
chr21	46112072	46112102	+	33
chr3	196829700	196829738	+	33
chr5	150297081	150297205	-	33
chr5	176509095	176509165	+	33
chr7	128748714	128748745	+	33
chr9	133361743	133361805	-	33
chr11	69653060	69653082	+	32
chr12	49272932	49272966	+	32
chr12	56596548	56596566	-	32
chr14	104937905	104937964	-	32
chr15	78548957	78548985	+	32
chr2	131048826	131048851	-	32
chr2	215334926	215334946	+	32
chr2	218595356	218595382	+	32
chr20	3805272	3805318	+	32
chr21	25881360	25881452	-	32
chr4	7762289	7762310	-	32
chr4	24527682	24527712	-	32
chr7	94395036	94395089	+	32
chr7	152179851	152179885	-	32
chrM	6428	6502	+	32
chrM	9006	9080	+	32
chrM	12346	12442	+	32
chr1	35184427	35184462	-	31
chr1	109592910	109592967	+	31
chr1	114706143	114706180	-	31
chr1	150575079	150575141	-	31
chr1	156742905	156742945	-	31
chr1	162781589	162781624	+	31
chr1	228098468	228098544	+	31
chr10	91863618	91863642	+	31
chr11	35229714	35229751	+	31
chr11	63625135	63625176	-	31
chr11	65891266	65891309	+	31
chr12	13215489	13215512	+	31
chr12	49272968	49273033	+	31
chr12	120698523	120698583	+	31
chr15	72199470	72199522	-	31
chr15	72199544	72199583	-	31
chr19	3978045	3978081	-	31
chr2	215431828	215431873	-	31
chr2	226793887	226793936	-	31
chr3	31623773	31623861	+	31
chr3	48468138	48468214	-	31
chr6	18225600	18225640	-	31
chr9	108979315	108979342	-	31
chr9	127506111	127506194	-	31
chr9	130233302	130233365	+	31
chrX	74586070	74586091	-	31
chr1	154207101	154207172	-	30
chr10	97456789	97456832	+	30
chr10	100150773	100150814	-	30
chr10	126017000	126017042	-	30
chr11	69653085	69653120	+	30
chr12	49184871	49184918	-	30
chr14	101986577	101986597	+	30
chr15	72199158	72199205	-	30
chr16	18806167	18806213	-	30
chr16	55482902	55482945	+	30
chr17	47656876	47656947	+	30
chr17	78991956	78991981	-	30
chr2	235797819	235797865	+	30
chr6	30725308	30725375	+	30
chr6	31862644	31862683	-	30
chr7	44828569	44828607	-	30
chr7	55210385	55210419	+	30
chr7	94410459	94410503	+	30
chr8	143915469	143915509	-	30
chrM	9302	9327	+	30
chrX	65741003	65741061	+	30
chrX	150768361	150768406	-	30
chr1	161531096	161531119	+	29
chr11	61964716	61964743	-	29
chr12	123261692	123261741	-	29
chr14	51254603	51254634	+	29
chr14	58508582	58508607	+	29
chr15	74410043	74410068	-	29
chr16	28842977	28843014	-	29
chr17	14348620	14348644	+	29
chr17	40017707	40017746	+	29
chr20	63933047	63933067	+	29
chr3	113720748	113720786	-	29
chr5	72205513	72205575	+	29
chr5	140117542	140117564	+	29
chr5	151662738	151662827	-	29
chr6	34245038	34245061	+	29
chr7	106091134	106091178	-	29
chr7	116797570	116797655	+	29
chr7	149589098	149589134	-	29
chr8	61625014	61625064	-	29
chrX	71301052	71301133	+	29
chr1	20485607	20485643	-	28
chr1	154207312	154207347	-	28
chr10	17235838	17235886	+	28
chr10	86437536	86437569	-	28
chr11	35230480	35230523	+	28
chr12	2803622	2803693	+	28
chr12	8053156	8053181	+	28
chr12	55727224	55727282	-	28
chr12	57057535	57057582	-	28
chr14	81277213	81277237	-	28
chr16	88715506	88715544	-	28
chr17	4945776	4945875	-	28
chr17	42403674	42403703	-	28
chr18	59328623	59328683	-	28
chr19	10133547	10133609	-	28
chr3	113721342	113721369	-	28
chr3	127691190	127691219	-	28
chr7	5605843	5605872	+	28
chr7	73536415	73536453	-	28
chr7	93886317	93886380	-	28
chr8	26653246	26653279	+	28
chr8	54147685	54147717	+	28
chr8	66113405	66113431	+	28
chr9	115030266	115030308	-	28
chrX	154018309	154018362	-	28
chrX	154365191	154365248	-	28
chr1	2403183	2403211	+	27
chr1	43170753	43170814	-	27
chr1	54031954	54031992	-	27
chr1	179842472	179842504	-	27
chr1	180113097	180113116	+	27
chr1	183103355	183103381	+	27
chr11	12941816	12941839	+	27
chr11	34096537	34096613	+	27
chr11	43343995	43344040	+	27
chr12	120697866	120697895	+	27
chr14	22920692	22920715	-	27
chr15	31376345	31376373	+	27
chr15	45521963	45521995	-	27
chr15	65296040	65296077	+	27
chr17	16440198	16440256	+	27
chr17	47682598	47682646	+	27
chr17	50189995	50190117	-	27
chr18	9400438	9400484	+	27
chr2	20201553	20201581	-	27
chr2	218238745	218238800	+	27
chr21	33552879	33552908	+	27
chr22	37225913	37225954	-	27
chr3	177021454	177021501	-	27
chr4	6642302	6642422	+	27
chr4	75643847	75643884	-	27
chr5	178895967	178895986	+	27
chr6	30725144	30725179	+	27
chr6	75253347	75253373	-	27
chr7	93886708	93886787	-	27
chr7	94395014	94395032	+	27
chr7	94411086	94411148	+	27
chr7	128848925	128848977	+	27
chr8	23136356	23136384	-	27
chr8	100721601	100721645	-	27
chr9	35722185	35722226	-	27
chr9	114598192	114598214	+	27
chr9	119276005	119276022	-	27
chrX	151407276	151407295	+	27
chr1	1785684	1785746	-	26
chr1	35184351	35184371	-	26
chr1	70251844	70251887	+	26
chr1	114733782	114733861	-	26
chr1	154583331	154583354	-	26
chr1	183251010	183251042	-	26
chr1	243164958	243164986	-	26
chr10	73249396	73249435	-	26
chr11	809955	809992	+	26
chr11	62524996	62525081	-	26
chr11	63628992	63629087	-	26
chr12	57211164	57211228	+	26
chr12	130876109	130876176	+	26
chr14	58239959	58239982	-	26
chr17	35724385	35724412	+	26
chr17	42842025	42842047	+	26
chr17	50194130	50194193	-	26
chr19	12940731	12940829	+	26
chr19	38730069	38730101	+	26
chr2	54982558	54982634	-	26
chr2	61499848	61499900	-	26
chr2	84906412	84906453	+	26
chr2	229764587	229764656	-	26
chr2	241353886	241353927	+	26
chr20	4701259	4701333	+	26
chr20	35557191	35557214	+	26
chr20	48625434	48625489	-	26
chr22	41246348	41246373	-	26
chr3	55467479	55467513	-	26
chr3	146110425	146110451	-	26
chr3	170092545	170092573	-	26
chr3	193694962	193695040	+	26
chr4	87983007	87983075	+	26
chr4	155347315	155347342	-	26
chr5	32601695	32601755	+	26
chr5	136977736	136977782	-	26
chr5	151663368	151663427	-	26
chr5	176658819	176658867	+	26
chr6	27505862	27505892	-	26
chr6	119177431	119177462	-	26
chrM	11748	11816	+	26
chrM	12581	12611	+	26
chrX	109642750	109642791	-	26
chr1	77161318	77161338	-	25
chr1	114717580	114717610	-	25
chr1	223771797	223771826	+	25
chr11	34100703	34100774	+	25
chr11	35230546	35230569	+	25
chr11	62629263	62629292	-	25
chr12	16364104	16364158	+	25
chr12	49127827	49127945	-	25
chr12	112022788	112022835	+	25
chr14	54940741	54940765	-	25
chr14	68789311	68789401	-	25
chr14	102081465	102081556	-	25
chr15	48420690	48420723	-	25
chr15	89199063	89199110	+	25
chr16	67438299	67438327	-	25
chr17	28624317	28624341	-	25
chr17	40454025	40454063	+	25
chr17	41691244	41691326	+	25
chr19	1435032	1435067	+	25
chr19	7963279	7963317	-	25
chr19	41861158	41861210	+	25
chr19	46920673	46920715	+	25
chr2	47280784	47280803	-	25
chr2	152637614	152637659	+	25
chr2	215334957	215334982	+	25
chr2	236214577	236214596	+	25
chr21	25880984	25881025	-	25
chr3	52533592	52533611	-	25
chr3	98798190	98798248	-	25
chr3	184259570	184259609	-	25
chr5	72208320	72208377	+	25
chr5	154814177	154814227	+	25
chr6	33780143	33780178	-	25
chr7	135646176	135646212	+	25
chr8	47977671	47977708	+	25
chr9	69718216	69718263	-	25
chr9	108979290	108979310	-	25
chr9	127506073	127506106	-	25
chrX	151407298	151407316	+	25
chr1	6591320	6591395	-	24
chr1	227193886	227193924	-	24
chr10	17233585	17233644	+	24
chr10	122514670	122514728	+	24
chr11	66276892	66276948	+	24
chr11	77665463	77665493	-	24
chr12	46185931	46185993	-	24
chr12	56596508	56596542	-	24
chr14	21210206	21210276	-	24
chr14	103341580	103341606	+	24
chr16	11762699	11762718	-	24
chr17	44851177	44851229	-	24
chr18	670698	670737	+	24
chr2	20254918	20254953	-	24
chr2	54972989	54973049	-	24
chr2	112520300	112520347	+	24
chr2	210433780	210433816	-	24
chr20	45326642	45326667	-	24
chr3	98797640	98797678	-	24
chr3	170091097	170091136	-	24
chr3	194405850	194405953	-	24
chr3	196049542	196049608	-	24
chr4	152911299	152911317	+	24
chr5	72206293	72206330	+	24
chr5	72208794	72208832	+	24
chr6	10730863	10730905	+	24
chr6	26330329	26330348	-	24
chr6	28863749	28863767	-	24
chr6	30725199	30725227	+	24
chr7	135927071	135927139	-	24
chr7	148963303	148963351	+	24
chr8	23842115	23842182	-	24
chr8	26410554	26410575	+	24
chr9	83968605	83968658	-	24
chr9	101563089	101563131	+	24
chr9	105366338	105366385	+	24
chrX	119243922	119243954	+	24
chrX	154011771	154011839	-	24
chrX	154365138	154365186	-	24
chr1	154583300	154583323	-	23
chr1	183143345	183143384	+	23
chr10	76887243	76887295	-	23
chr11	866951	866977	+	23
chr11	62629234	62629253	-	23
chr11	65125525	65125563	+	23
chr11	69652734	69652784	+	23
chr12	6537859	6537949	+	23
chr12	64713641	64713703	-	23
chr14	68788624	68788708	-	23
chr15	72199339	72199435	-	23
chr15	73927662	73927679	-	23
chr16	55482950	55483004	+	23
chr16	74462561	74462596	-	23
chr17	17188128	17188153	+	23
chr17	32481165	32481191	+	23
chr17	50072072	50072118	+	23
chr17	50189444	50189488	-	23
chr17	54962752	54962788	-	23
chr17	58490902	58490953	-	23
chr17	60786255	60786274	+	23
chr17	81868518	81868539	-	23
chr18	46088124	46088157	-	23
chr19	3976196	3976219	-	23
chr2	46356783	46356807	+	23
chr2	215361101	215361171	-	23
chr20	35557220	35557252	+	23
chr20	44907390	44907442	+	23
chr3	52255703	52255726	-	23
chr3	98798060	98798147	-	23
chr3	120688397	120688455	-	23
chr4	98471363	98471397	-	23
chr4	113452512	113452537	-	23
chr6	34245159	34245177	+	23
chr7	55470691	55470712	-	23
chr7	107940273	107940339	-	23
chr8	144785384	144785407	+	23
chr9	88475362	88475421	+	23
chr9	131578471	131578491	-	23
chrM	9789	9872	+	23
chrX	154010578	154010660	-	23
chr1	8866455	8866500	-	22
chr1	24841420	24841454	+	22
chr1	152032740	152032760	-	22
chr1	153535239	153535271	-	22
chr1	154212326	154212367	-	22
chr1	234606549	234606571	-	22
chr10	96521436	96521491	-	22
chr10	122514782	122514854	+	22
chr11	65546542	65546566	-	22
chr12	54395656	54395709	-	22
chr12	57195015	57195058	+	22
chr12	57211293	57211317	+	22
chr12	110731859	110731883	-	22
chr12	111447768	111447801	+	22
chr12	120698297	120698322	+	22
chr13	48261420	48261477	+	22
chr14	76196245	76196272	+	22
chr14	90405232	90405281	+	22
chr14	101980453	101980488	+	22
chr14	102081120	102081154	-	22
chr15	66503134	66503168	-	22
chr15	72231117	72231166	-	22
chr15	92808644	92808664	+	22
chr16	22077118	22077148	+	22
chr16	57153523	57153555	-	22
chr16	58629772	58629830	-	22
chr16	87384086	87384104	-	22
chr17	50080171	50080205	+	22
chr17	62666473	62666520	+	22
chr17	76680681	76680719	-	22
chr17	81868459	81868501	-	22
chr19	4838637	4838670	-	22
chr2	131048952	131048990	-	22
chr2	131147988	131148063	+	22
chr2	152143923	152143945	-	22
chr2	173909432	173909460	-	22
chr2	237361816	237361836	-	22
chr20	45326536	45326598	-	22
chr3	120329007	120329044	-	22
chr4	67618204	67618236	-	22
chr4	77038419	77038451	+	22
chr5	136046332	136046379	+	22
chr6	33065282	33065345	-	22
chr6	75253436	75253456	-	22
chr6	85467184	85467236	+	22
chr6	146604202	146604242	+	22
chr7	101138097	101138151	+	22
chr7	101138212	101138260	+	22
chr7	128771947	128771973	+	22
chr7	135927258	135927319	-	22
chr8	23842283	23842321	-	22
chr9	84003859	84003878	+	22
chr9	98015637	98015696	+	22
chrM	4909	4988	+	22
chrM	12267	12294	+	22
chrM	15420	15478	+	22
chr1	8861196	8861245	-	21
chr1	8866403	8866453	-	21
chr1	16396561	16396618	+	21
chr1	28201008	28201035	-	21
chr1	40072159	40072215	+	21
chr1	84671288	84671316	-	21
chr1	150220564	150220590	-	21
chr1	156742201	156742278	-	21
chr1	203743012	203743051	+	21
chr10	17229820	17229887	+	21
chr10	17235273	17235348	+	21
chr10	73007781	73007802	-	21
chr11	18407457	18407516	+	21
chr11	61967580	61967643	-	21
chr11	69652530	69652570	+	21
chr11	118748443	118748494	-	21
chr11	123072531	123072564	-	21
chr12	76028289	76028351	-	21
chr12	103947647	103947692	+	21
chr12	111418268	111418296	+	21
chr12	112508154	112508178	+	21
chr14	52671633	52671673	-	21
chr14	54427244	54427272	-	21
chr14	68788709	68788748	-	21
chr14	70031643	70031678	+	21
chr14	92162916	92162936	+	21
chr14	102084915	102085006	-	21
chr17	18208595	18208657	+	21
chr17	42402973	42403057	-	21
chr17	44932164	44932184	-	21
chr17	50074140	50074209	+	21
chr17	50088268	50088310	+	21
chr17	75033928	75033947	+	21
chr17	81843697	81843755	-	21
chr18	23482946	23482970	+	21
chr18	46086384	46086412	-	21
chr19	4838678	4838726	-	21
chr19	47581161	47581178	+	21
chr2	33399139	33399199	+	21
chr2	218274401	218274446	-	21
chr2	219289995	219290030	-	21
chr2	230878537	230878587	+	21
chr2	230878617	230878678	+	21
chr2	237324192	237324256	-	21
chr20	43713007	43713076	+	21
chr20	50958495	50958543	-	21
chr21	33553199	33553252	+	21
chr22	20951935	20951986	+	21
chr22	36282165	36282189	-	21
chr3	58130813	58130850	+	21
chr3	99798275	99798344	+	21
chr3	194405464	194405506	-	21
chr4	1975331	1975351	+	21
chr4	152911318	152911344	+	21
chr4	169721867	169721906	+	21
chr5	60891028	60891047	-	21
chr5	181188461	181188498	-	21
chr6	73824507	73824545	+	21
chr6	149789950	149789994	+	21
chr7	73540001	73540053	-	21
chr7	148987240	148987258	-	21
chr9	107329905	107329985	+	21
chr9	113594121	113594163	+	21
chr9	115020942	115021034	-	21
chr9	127691490	127691524	+	21
chrX	154368013	154368060	-	21
chr1	8012633	8012691	-	20
chr1	12002009	12002037	+	20
chr1	36348765	36348798	-	20
chr1	47377537	47377589	+	20
chr1	156263501	156263530	-	20
chr1	162528574	162528629	+	20
chr1	183250915	183250976	-	20
chr1	228493873	228493917	+	20
chr10	73007803	73007841	-	20
chr11	502060	502115	-	20
chr11	18407632	18407654	+	20
chr11	61789794	61789849	-	20
chr11	77322687	77322709	-	20
chr12	24878529	24878572	-	20
chr12	76028561	76028637	-	20
chr14	93293988	93294027	-	20
chr14	103522591	103522617	-	20
chr16	57153556	57153585	-	20
chr18	54893504	54893549	+	20
chr18	68674701	68674744	-	20
chr19	2101639	2101676	-	20
chr19	11359542	11359565	+	20
chr19	55095437	55095460	-	20
chr19	57306355	57306381	+	20
chr2	54972267	54972384	-	20
chr2	86504663	86504695	-	20
chr2	101893176	101893213	+	20
chr2	162033618	162033644	-	20
chr2	215361257	215361348	-	20
chr2	215375281	215375363	-	20
chr2	218595257	218595301	+	20
chr2	237324352	237324404	-	20
chr2	241248048	241248110	-	20
chr20	58445260	58445318	+	20
chr22	36281825	36281894	-	20
chr22	40330410	40330436	+	20
chr3	98799190	98799281	-	20
chr3	169982702	169982734	+	20
chr4	87983099	87983137	+	20
chr5	97032725	97032752	+	20
chr5	134605912	134605934	-	20
chr5	138934198	138934215	+	20
chr5	151662898	151662959	-	20
chr5	179730349	179730375	+	20
chr6	26104252	26104276	+	20
chr6	134133763	134133795	+	20
chr7	22944735	22944819	-	20
chr7	107929442	107929463	-	20
chr7	151118237	151118281	+	20
chr7	151556262	151556306	-	20
chr8	61714301	61714345	-	20
chr8	70583683	70583773	-	20
chr9	6506737	6506773	+	20
chr9	35057039	35057062	-	20
chr9	98015709	98015740	+	20
chr9	125236382	125236435	-	20
chr9	134642247	134642290	+	20
chrM	13975	14064	+	20
chrX	16853680	16853715	-	20
chr1	25900730	25900811	-	19
chr1	39442852	39442877	+	19
chr1	119923671	119923701	-	19
chr1	178916847	178916882	+	19
chr1	208028005	208028028	-	19
chr1	222734853	222734907	+	19
chr1	224190134	224190186	+	19
chr1	244862634	244862675	-	19
chr10	71816755	71816828	-	19
chr11	10803230	10803249	-	19
chr11	18407143	18407209	+	19
chr11	47466960	47467001	-	19
chr11	62516227	62516303	-	19
chr11	119018286	119018311	-	19
chr11	120485809	120485836	+	19
chr12	6536678	6536726	+	19
chr12	46185037	46185096	-	19
chr12	120222567	120222587	-	19
chr13	48261563	48261612	+	19
chr13	91354175	91354212	+	19
chr14	55673232	55673260	+	19
chr14	55684204	55684219	+	19
chr14	90406571	90406624	+	19
chr14	96090780	96090802	+	19
chr15	48441730	48441785	-	19
chr15	48879305	48879354	+	19
chr15	58595741	58595784	-	19
chr15	63071397	63071420	+	19
chr15	69455199	69455261	+	19
chr15	89195821	89195876	+	19
chr16	55506040	55506115	+	19
chr16	56608577	56608622	+	19
chr17	7514448	7514474	+	19
chr17	42404471	42404506	-	19
chr17	43211210	43211240	+	19
chr17	50075627	50075663	+	19
chr17	50188533	50188611	-	19
chr17	50695591	50695637	-	19
chr17	81510225	81510247	-	19
chr17	81843488	81843557	-	19
chr19	2101529	2101568	-	19
chr2	9414219	9414264	-	19
chr2	26191364	26191401	-	19
chr2	58163443	58163481	-	19
chr2	69387193	69387226	-	19
chr2	74165217	74165284	-	19
chr2	216501460	216501499	+	19
chr2	223998280	223998300	-	19
chr20	41163434	41163474	+	19
chr20	47655622	47655645	+	19
chr20	49114554	49114582	-	19
chr21	25982464	25982485	-	19
chr21	45264309	45264349	-	19
chr3	10115784	10115824	+	19
chr3	98800610	98800666	-	19
chr3	184259518	184259554	-	19
chr4	1340057	1340088	+	19
chr4	67618573	67618602	-	19
chr4	118757762	118757823	-	19
chr6	43785805	43785866	+	19
chr6	75253716	75253756	-	19
chr6	127290048	127290126	-	19
chr7	55208898	55208938	+	19
chr8	140659246	140659276	-	19
chr9	89012320	89012338	-	19
chr9	91409276	91409303	-	19
chrX	48577555	48577628	+	19
chrX	103330253	103330284	+	19
chrX	110195695	110195732	-	19
chr1	8866307	8866347	-	18
chr1	32775342	32775388	-	18
chr1	112670291	112670314	+	18
chr10	102107379	102107413	-	18
chr10	102163747	102163790	+	18
chr11	62530234	62530283	-	18
chr12	49272781	49272830	+	18
chr12	49764410	49764457	+	18
chr12	54395347	54395408	-	18
chr12	57179425	57179468	+	18
chr12	120212194	120212231	-	18
chr14	52666463	52666515	-	18
chr14	102081291	102081319	-	18
chr15	48410531	48410595	-	18
chr15	72199595	72199618	-	18
chr16	22285257	22285304	+	18
chr17	13494119	13494166	-	18
chr17	17812384	17812410	-	18
chr17	48863094	48863142	+	18
chr17	50201609	50201639	-	18
chr17	59681403	59681429	+	18
chr17	81890789	81890826	-	18
chr19	2769008	2769045	-	18
chr19	11010508	11010534	+	18
chr19	12940600	12940645	+	18
chr19	41869033	41869063	+	18
chr2	32499953	32499978	+	18
chr2	38984932	38984993	-	18
chr2	54972840	54972895	-	18
chr2	131147110	131147152	+	18
chr2	175928436	175928523	-	18
chr2	178513498	178513517	+	18
chr2	216499940	216500016	+	18
chr2	229358163	229358251	-	18
chr2	231172590	231172640	+	18
chr20	35949457	35949491	+	18
chr21	33549917	33549967	+	18
chr21	37165787	37165808	+	18
chr22	32387887	32387920	-	18
chr22	37675677	37675713	+	18
chr3	9789563	9789587	-	18
chr3	10126749	10126817	+	18
chr4	6642254	6642294	+	18
chr4	10116187	10116220	-	18
chr4	87983250	87983284	+	18
chr4	98471415	98471490	-	18
chr4	174262766	174262786	-	18
chr5	181241494	181241549	-	18
chr6	10730819	10730862	+	18
chr6	26104213	26104247	+	18
chr6	28589367	28589385	+	18
chr6	81746484	81746515	-	18
chr6	85467146	85467170	+	18
chr7	25123318	25123366	-	18
chr7	45917377	45917427	-	18
chr7	107975762	107975843	-	18
chr8	23328475	23328504	-	18
chr8	56074461	56074513	-	18
chr9	35657999	35658030	-	18
chr9	89316623	89316644	+	18
chr9	104831786	104831830	-	18
chrM	8671	8724	+	18
chrM	9583	9626	+	18
chrM	11072	11095	+	18
chrM	14101	14159	+	18
chrX	23786024	23786076	+	18
chrX	154353070	154353111	-	18
chr1	11975293	11975323	+	17
chr1	24844081	24844109	+	17
chr1	27405866	27405905	-	17
chr1	114706360	114706428	-	17
chr1	114749899	114749949	-	17
chr1	178916808	178916842	+	17
chr1	203179271	203179306	-	17
chr10	17233912	17233934	+	17
chr10	32911884	32911906	-	17
chr10	70425181	70425211	+	17
chr10	74119287	74119308	+	17
chr11	35230715	35230741	+	17
chr11	65500673	65500733	+	17
chr11	65502845	65502890	+	17
chr11	123084507	123084528	-	17
chr12	6538309	6538339	+	17
chr12	55728270	55728309	-	17
chr12	57431168	57431190	+	17
chr12	111418229	111418263	+	17
chr12	118033688	118033728	-	17
chr12	120293229	120293247	-	17
chr13	99540734	99540791	+	17
chr13	113323268	113323357	+	17
chr14	49622542	49622561	+	17
chr14	61795203	61795251	+	17
chr15	52550725	52550744	-	17
chr15	63325062	63325144	-	17
chr15	72218938	72218998	-	17
chr16	55505612	55505652	+	17
chr16	69741959	69741996	-	17
chr16	84662354	84662386	+	17
chr17	17188172	17188223	+	17
chr17	35724355	35724383	+	17
chr17	81868407	81868457	-	17
chr18	35934105	35934124	-	17
chr18	59329599	59329619	-	17
chr18	68675317	68675353	-	17
chr19	810937	810991	+	17
chr19	2101386	2101412	-	17
chr19	3978018	3978040	-	17
chr19	48873564	48873598	+	17
chr2	131149547	131149608	+	17
chr2	175929838	175929862	-	17
chr2	210434339	210434368	-	17
chr2	231459059	231459078	-	17
chr2	237339064	237339114	-	17
chr2	237369022	237369082	-	17
chr2	241353865	241353884	+	17
chr20	36779258	36779327	-	17
chr20	59038494	59038517	-	17
chr21	26842498	26842524	-	17
chr22	36281796	36281823	-	17
chr3	39408614	39408665	+	17
chr3	52528026	52528050	-	17
chr3	53572776	53572793	+	17
chr3	113632770	113632813	+	17
chr3	120328539	120328585	-	17
chr3	120328964	120329002	-	17
chr3	130930504	130930532	+	17
chr3	149030449	149030510	-	17
chr3	156542913	156542935	-	17
chr3	170866486	170866509	-	17
chr3	191391960	191391982	+	17
chr4	139509498	139509535	-	17
chr5	5461218	5461257	+	17
chr5	136046872	136046920	+	17
chr5	150795981	150796012	+	17
chr5	179837069	179837149	+	17
chr5	180791032	180791054	-	17
chr6	7289326	7289360	-	17
chr6	47626584	47626658	+	17
chr6	52499849	52499879	-	17
chr6	75253924	75253954	-	17
chr6	158192269	158192307	+	17
chr7	73687049	73687098	+	17
chr7	74121883	74121918	+	17
chr8	56960140	56960197	-	17
chr8	124504270	124504291	-	17
chr9	33112406	33112438	-	17
chr9	33113209	33113248	-	17
chr9	34589038	34589055	-	17
chr9	36211805	36211839	+	17
chr9	76571794	76571848	+	17
chr9	130222716	130222741	+	17
chr9	130880540	130880558	+	17
chrM	10943	10974	+	17
chrM	15910	15930	+	17
chrX	65740209	65740259	+	17
chrX	78103826	78103850	+	17
chrX	78104046	78104095	+	17
chrX	104120794	104120814	-	17
chrX	123908181	123908259	+	17
chrX	154355038	154355080	-	17
chr1	2308653	2308705	+	16
chr1	8011890	8011951	-	16
chr1	51794491	51794526	-	16
chr1	110346492	110346539	+	16
chr1	113974191	113974233	+	16
chr1	114720610	114720675	-	16
chr1	155880528	155880567	+	16
chr1	155882287	155882325	+	16
chr1	183103382	183103402	+	16
chr1	205717899	205717919	-	16
chr1	225789405	225789451	+	16
chr10	5765365	5765392	-	16
chr10	32911973	32912034	-	16
chr10	32920341	32920374	-	16
chr10	68983899	68983939	+	16
chr10	73249631	73249656	-	16
chr10	95686507	95686540	-	16
chr11	65855156	65855179	-	16
chr11	69652069	69652096	+	16
chr11	76550820	76550850	+	16
chr12	49764342	49764402	+	16
chr12	57193166	57193220	+	16
chr12	120697908	120697928	+	16
chr14	90404992	90405043	+	16
chr14	102027625	102027660	+	16
chr14	102038783	102038818	+	16
chr14	106636660	106636677	+	16
chr15	28213837	28213855	-	16
chr15	60351726	60351764	-	16
chr16	9103640	9103674	+	16
chr16	54283445	54283477	-	16
chr16	58521015	58521044	-	16
chr17	5022123	5022168	+	16
chr17	18208689	18208717	+	16
chr17	18305121	18305157	-	16
chr17	35724706	35724760	+	16
chr17	45106801	45106867	+	16
chr17	50186770	50186816	-	16
chr17	78223867	78223904	+	16
chr17	81511526	81511576	-	16
chr18	63389972	63389993	-	16
chr19	41260876	41260914	+	16
chr2	61031526	61031548	+	16
chr2	113942255	113942287	+	16
chr2	119264037	119264109	+	16
chr2	127329931	127329965	-	16
chr2	173222446	173222481	+	16
chr2	190969769	190969803	-	16
chr2	215433354	215433415	-	16
chr2	224765595	224765617	-	16
chr2	231172645	231172674	+	16
chr2	237363268	237363324	-	16
chr20	49319323	49319341	-	16
chr20	62387317	62387369	+	16
chr21	33552828	33552862	+	16
chr3	98797493	98797537	-	16
chr4	87983170	87983220	+	16
chr5	5461262	5461286	+	16
chr5	38935360	38935406	+	16
chr5	72207969	72208014	+	16
chr5	80142187	80142206	-	16
chr5	136063691	136063723	+	16
chr5	151663164	151663190	-	16
chr5	154902551	154902571	-	16
chr6	34245968	34245987	+	16
chr6	52277532	52277552	-	16
chr6	52277553	52277585	-	16
chr6	52502514	52502532	-	16
chr6	75253678	75253714	-	16
chr6	136259214	136259246	-	16
chr7	33005586	33005614	+	16
chr7	66957702	66957741	+	16
chr7	76328010	76328030	-	16
chr7	94417766	94417816	+	16
chr7	128770260	128770325	+	16
chr7	139570455	139570521	-	16
chr7	139571198	139571217	-	16
chr7	157178778	157178805	+	16
chr8	26410581	26410630	+	16
chr9	87726118	87726152	+	16
chrM	8623	8661	+	16
chrX	65740264	65740325	+	16
chrX	74533105	74533172	+	16
chr1	7965344	7965378	+	15
chr1	28200770	28200788	-	15
chr1	39410633	39410658	+	15
chr1	111461009	111461063	+	15
chr1	112701653	112701696	-	15
chr1	153535307	153535362	-	15
chr1	158098580	158098640	+	15
chr1	159051856	159051891	+	15
chr1	201820986	201821023	+	15
chr1	203743350	203743402	+	15
chr1	228493920	228493941	+	15
chr1	230281801	230281826	+	15
chr10	17236289	17236317	+	15
chr10	71816444	71816491	-	15
chr10	79352332	79352354	+	15
chr10	95606198	95606217	-	15
chr10	110511035	110511080	+	15
chr11	10804359	10804396	-	15
chr11	35229673	35229705	+	15
chr11	35230296	35230357	+	15
chr11	35232234	35232273	+	15
chr11	59551782	59551809	+	15
chr11	65500975	65501035	+	15
chr11	69652596	69652656	+	15
chr11	70435867	70435902	+	15
chr12	1494019	1494043	+	15
chr12	21469797	21469817	-	15
chr12	22453897	22453919	-	15
chr12	24815076	24815148	-	15
chr12	54405272	54405300	-	15
chr12	57194978	57195010	+	15
chr12	76027414	76027456	-	15
chr12	102061277	102061299	-	15
chr12	120222588	120222624	-	15
chr12	120694197	120694250	+	15
chr12	123758830	123758868	+	15
chr12	131068178	131068195	+	15
chr13	97989096	97989130	+	15
chr13	98010118	98010151	+	15
chr13	98012319	98012340	+	15
chr13	98014057	98014089	+	15
chr14	22845861	22845888	+	15
chr14	96565598	96565658	+	15
chr14	100278078	100278103	+	15
chr14	104937634	104937711	-	15
chr14	105479705	105479745	+	15
chr15	44524282	44524324	+	15
chr15	55204495	55204541	-	15
chr16	14668487	14668514	+	15
chr16	28125720	28125757	-	15
chr16	47082965	47083018	-	15
chr16	57428775	57428828	-	15
chr17	5022216	5022265	+	15
chr17	7514406	7514436	+	15
chr17	17150138	17150164	+	15
chr17	17820239	17820269	-	15
chr17	29546909	29546931	+	15
chr17	42423160	42423228	-	15
chr17	44075356	44075377	+	15
chr17	50195434	50195485	-	15
chr17	50197944	50198005	-	15
chr17	77498891	77498948	+	15
chr17	81868541	81868585	-	15
chr18	9400411	9400430	+	15
chr18	9954139	9954177	+	15
chr19	6418511	6418561	-	15
chr19	11448535	11448565	+	15
chr19	49686141	49686161	+	15
chr2	26394142	26394177	+	15
chr2	65268851	65268870	+	15
chr2	131491881	131491917	-	15
chr2	135784418	135784454	+	15
chr2	175117997	175118057	-	15
chr2	210678831	210678884	+	15
chr2	215367903	215367929	-	15
chr2	215425235	215425302	-	15
chr2	230879078	230879111	+	15
chr2	237381374	237381395	-	15
chr20	37022724	37022770	-	15
chr20	37241453	37241482	+	15
chr20	62294525	62294560	+	15
chr21	25911814	25911866	-	15
chr21	33553265	33553315	+	15
chr21	37188501	37188539	+	15
chr21	41885218	41885252	-	15
chr22	38819670	38819711	-	15
chr3	17161152	17161206	-	15
chr3	32534622	32534644	-	15
chr3	39411937	39411973	+	15
chr3	49533733	49533795	+	15
chr3	194405560	194405594	-	15
chr4	1340001	1340051	+	15
chr4	38133222	38133259	+	15
chr4	113452566	113452622	-	15
chr5	113024129	113024175	-	15
chr5	159162999	159163044	-	15
chr5	179836630	179836705	+	15
chr6	18257958	18257984	-	15
chr6	73827980	73828001	+	15
chr6	106553513	106553566	+	15
chr6	108222990	108223053	-	15
chr7	260102	260136	+	15
chr7	56080044	56080110	+	15
chr7	94400206	94400286	+	15
chr7	101138046	101138094	+	15
chr7	128748630	128748704	+	15
chr7	128770392	128770430	+	15
chr7	128840653	128840677	+	15
chr7	135929019	135929088	-	15
chr7	137875843	137875899	-	15
chr7	139567275	139567314	-	15
chr7	151078943	151078992	-	15
chr7	152177998	152178018	-	15
chr8	37755635	37755688	+	15
chr8	47977144	47977162	+	15
chr8	116847246	116847299	-	15
chr8	145054444	145054493	+	15
chrM	8591	8618	+	15
chrM	9104	9182	+	15
chrX	12976953	12977001	+	15
chrX	20156219	20156264	-	15
chrX	154357433	154357471	-	15
chr1	16443702	16443721	+	14
chr1	24797786	24797842	+	14
chr1	25900263	25900292	-	14
chr1	66985927	66985944	+	14
chr1	119923635	119923665	-	14
chr1	119926526	119926589	-	14
chr1	144551867	144551888	-	14
chr1	151248265	151248291	+	14
chr1	162781635	162781654	+	14
chr1	220137989	220138027	+	14
chr1	223780502	223780548	-	14
chr1	228098061	228098088	+	14
chr10	28620110	28620140	+	14
chr10	32890187	32890274	-	14
chr10	43386391	43386478	-	14
chr10	122514640	122514662	+	14
chr10	125816188	125816211	-	14
chr11	1481830	1481847	-	14
chr11	4055545	4055580	+	14
chr11	6641876	6641894	+	14
chr11	35230367	35230406	+	14
chr11	62453541	62453558	-	14
chr11	65890718	65890735	+	14
chr12	1494086	1494118	+	14
chr12	8053126	8053145	+	14
chr12	46183732	46183761	-	14
chr12	49763084	49763149	+	14
chr12	49763773	49763803	+	14
chr12	53479669	53479720	+	14
chr12	107659391	107659417	+	14
chr12	112509028	112509047	+	14
chr12	123034621	123034655	-	14
chr13	113263910	113263980	+	14
chr14	59504126	59504169	+	14
chr14	81473613	81473658	-	14
chr15	41561235	41561278	+	14
chr15	44717795	44717834	+	14
chr16	2762640	2762677	+	14
chr16	28842927	28842951	-	14
chr16	31112145	31112173	+	14
chr16	55479511	55479549	+	14
chr16	57042249	57042266	+	14
chr16	70159625	70159643	+	14
chr17	32370028	32370046	+	14
chr17	38853717	38853736	-	14
chr17	41689903	41689923	+	14
chr17	42797807	42797881	-	14
chr17	42841643	42841687	+	14
chr17	50073911	50073994	+	14
chr17	50194717	50194768	-	14
chr17	81869602	81869622	-	14
chr18	8638555	8638579	+	14
chr18	68675354	68675389	-	14
chr19	3980016	3980081	-	14
chr19	5787479	5787514	-	14
chr19	12944097	12944151	+	14
chr19	14478224	14478259	-	14
chr19	41344783	41344827	-	14
chr19	46838382	46838425	-	14
chr19	53875786	53875812	+	14
chr2	32220950	32220981	+	14
chr2	46346927	46346986	+	14
chr2	109544747	109544767	-	14
chr2	175928797	175928827	-	14
chr2	182978873	182978901	-	14
chr2	200830022	200830041	+	14
chr2	205765494	205765555	+	14
chr20	3650603	3650645	+	14
chr20	23457603	23457627	-	14
chr20	44906764	44906808	+	14
chr20	44907520	44907549	+	14
chr20	58459494	58459540	-	14
chr21	14373700	14373730	-	14
chr22	30334380	30334414	-	14
chr3	30692834	30692854	+	14
chr3	128067483	128067552	+	14
chr3	133589657	133589679	+	14
chr3	149030590	149030623	-	14
chr3	152464877	152464926	+	14
chr3	179784559	179784608	+	14
chr3	179784627	179784651	+	14
chr3	185923971	185923992	-	14
chr3	196735877	196735928	+	14
chr4	6641807	6641894	+	14
chr5	34830978	34831019	+	14
chr5	72909510	72909549	+	14
chr5	122065128	122065167	-	14
chr5	140647519	140647546	-	14
chr5	149982296	149982318	+	14
chr5	177595625	177595669	+	14
chr5	179800186	179800224	-	14
chr6	134133635	134133662	+	14
chr6	136258969	136258996	-	14
chr6	146554730	146554775	+	14
chr6	149410574	149410624	+	14
chr7	55151296	55151336	+	14
chr7	128769121	128769170	+	14
chr7	128770013	128770050	+	14
chr7	131489351	131489409	+	14
chr8	22253952	22253973	+	14
chr8	66114017	66114048	+	14
chr8	97699829	97699850	+	14
chr8	100703147	100703171	-	14
chr8	100919327	100919359	-	14
chr8	116846524	116846552	-	14
chr9	34251754	34251798	+	14
chr9	92210497	92210517	-	14
chr9	125438208	125438290	-	14
chrM	4008	4052	+	14
chrM	9715	9787	+	14
chrX	119243861	119243916	+	14
chrX	153696103	153696154	+	14
chr1	6591969	6592000	-	13
chr1	8012452	8012483	-	13
chr1	16889688	16889727	+	13
chr1	32043314	32043371	+	13
chr1	40464963	40464991	+	13
chr1	46696560	46696610	-	13
chr1	53766429	53766476	-	13
chr1	116404498	116404575	+	13
chr1	119965505	119965572	-	13
chr1	151400436	151400478	+	13
chr1	161531201	161531236	+	13
chr1	186406137	186406173	+	13
chr10	17230643	17230713	+	13
chr10	24849050	24849095	-	13
chr10	32900855	32900905	-	13
chr10	43183921	43183977	+	13
chr10	70161692	70161733	-	13
chr10	131967883	131967905	-	13
chr10	133325065	133325082	-	13
chr11	14474544	14474577	-	13
chr11	18407377	18407435	+	13
chr11	35230571	35230618	+	13
chr11	44244554	44244595	+	13
chr11	62516024	62516069	-	13
chr11	62629924	62629971	-	13
chr11	65896785	65896820	-	13
chr11	66277192	66277239	+	13
chr11	68613703	68613743	+	13
chr12	6870436	6870462	+	13
chr12	22449867	22449891	-	13
chr12	49272348	49272380	+	13
chr12	54240183	54240228	-	13
chr12	54405665	54405723	-	13
chr12	56239009	56239052	-	13
chr12	57196089	57196124	+	13
chr12	98601448	98601502	+	13
chr12	122866227	122866265	-	13
chr14	52636912	52636933	+	13
chr14	54427273	54427311	-	13
chr14	54476157	54476187	-	13
chr14	64483618	64483646	-	13
chr14	77464586	77464634	+	13
chr14	102983651	102983669	-	13
chr15	41481778	41481799	+	13
chr15	43866630	43866653	+	13
chr15	43988806	43988825	-	13
chr15	55848815	55848849	-	13
chr15	59114532	59114563	+	13
chr15	61852543	61852575	-	13
chr15	72207208	72207244	-	13
chr16	3191979	3192031	+	13
chr16	55505556	55505604	+	13
chr16	57119561	57119589	+	13
chr16	84054257	84054307	-	13
chr16	84665715	84665772	+	13
chr17	2683433	2683483	+	13
chr17	4167031	4167056	-	13
chr17	50089176	50089200	+	13
chr17	50189876	50189917	-	13
chr17	64503205	64503257	-	13
chr17	81510084	81510122	-	13
chr17	81868341	81868390	-	13
chr17	82442770	82442804	-	13
chr18	9860685	9860717	+	13
chr19	2101335	2101381	-	13
chr19	2431775	2431799	-	13
chr19	10690547	10690590	+	13
chr19	17187972	17188012	+	13
chr19	22694890	22694908	-	13
chr19	49799666	49799690	+	13
chr19	53875729	53875775	+	13
chr19	54180047	54180099	-	13
chr2	10448304	10448331	-	13
chr2	20204137	20204203	-	13
chr2	27233178	27233214	+	13
chr2	54972511	54972556	-	13
chr2	61278406	61278424	-	13
chr2	119263996	119264035	+	13
chr2	119264715	119264737	+	13
chr2	187465801	187465834	-	13
chr2	215383425	215383451	-	13
chr2	234494836	234494882	-	13
chr2	237334777	237334808	-	13
chr2	237377045	237377083	-	13
chr20	41163710	41163755	+	13
chr20	49063202	49063226	+	13
chr21	8218713	8218742	+	13
chr21	43759622	43759667	+	13
chr21	46004533	46004613	+	13
chr21	46120543	46120581	+	13
chr22	36341377	36341422	-	13
chr22	41246583	41246606	-	13
chr3	3148717	3148752	+	13
chr3	10126435	10126474	+	13
chr3	14485997	14486027	+	13
chr3	14945038	14945080	-	13
chr3	41240073	41240109	+	13
chr3	52256164	52256208	-	13
chr3	98796767	98796817	-	13
chr3	98797180	98797251	-	13
chr3	98798492	98798526	-	13
chr3	128055672	128055704	+	13
chr3	130932045	130932106	+	13
chr3	141913704	141913739	+	13
chr3	146070510	146070568	-	13
chr3	182919843	182919878	+	13
chr3	194437436	194437466	-	13
chr4	3213961	3213993	+	13
chr4	38908633	38908663	+	13
chr4	52028800	52028827	-	13
chr4	145146400	145146438	-	13
chr5	16474000	16474041	-	13
chr5	34954929	34954990	+	13
chr5	55938676	55938726	-	13
chr5	65667715	65667748	-	13
chr5	78476638	78476668	+	13
chr5	87268579	87268606	+	13
chr5	103003045	103003078	+	13
chr5	171900063	171900101	-	13
chr5	177515028	177515056	-	13
chr5	179722867	179722939	+	13
chr5	180791343	180791389	-	13
chr6	26056249	26056287	-	13
chr6	31354473	31354529	-	13
chr6	49492378	49492423	+	13
chr6	146554640	146554679	+	13
chr7	44883457	44883483	-	13
chr7	50590828	50590878	-	13
chr7	55198732	55198756	+	13
chr7	74099136	74099169	+	13
chr7	74121833	74121861	+	13
chr7	74195773	74195821	+	13
chr7	87399410	87399452	+	13
chr7	92971159	92971179	-	13
chr7	101138868	101138897	+	13
chr7	128769284	128769316	+	13
chr7	128770514	128770565	+	13
chr7	128848669	128848692	+	13
chr7	130132837	130132881	+	13
chr7	134968494	134968557	+	13
chr7	151238019	151238066	+	13
chr8	8891768	8891800	-	13
chr8	11848062	11848130	-	13
chr8	17243158	17243192	-	13
chr8	23302070	23302092	-	13
chr8	23842329	23842401	-	13
chr8	38848137	38848177	+	13
chr8	38851499	38851545	+	13
chr8	43127802	43127823	+	13
chr8	56961384	56961430	-	13
chr8	63211465	63211505	+	13
chr8	97691166	97691192	+	13
chr8	102828356	102828384	-	13
chr8	118976501	118976518	+	13
chr8	143915522	143915563	-	13
chr9	93446712	93446768	-	13
chr9	127505999	127506048	-	13
chrM	4847	4908	+	13
chrM	9263	9298	+	13
chrM	14519	14555	-	13
chrM	15807	15837	+	13
chrX	154399500	154399549	+	13
chr1	6635016	6635063	-	12
chr1	8012601	8012627	-	12
chr1	11020576	11020602	+	12
chr1	15430077	15430116	+	12
chr1	33324202	33324250	-	12
chr1	36064789	36064837	+	12
chr1	43360524	43360542	+	12
chr1	51973407	51973437	+	12
chr1	84645125	84645166	-	12
chr1	109094837	109094879	+	12
chr1	109311072	109311103	-	12
chr1	109317948	109317975	-	12
chr1	110343708	110343748	+	12
chr1	113593087	113593104	+	12
chr1	113895362	113895381	-	12
chr1	113974062	113974096	+	12
chr1	114717626	114717656	-	12
chr1	119621263	119621290	-	12
chr1	162525956	162526016	+	12
chr1	183144895	183144942	+	12
chr1	201969554	201969586	+	12
chr1	206733055	206733083	+	12
chr1	207761403	207761424	+	12
chr1	223770493	223770524	+	12
chr1	224190113	224190132	+	12
chr1	230280268	230280290	+	12
chr10	17229493	17229543	+	12
chr10	58395585	58395616	+	12
chr10	68983073	68983124	+	12
chr10	73376014	73376063	-	12
chr10	99661560	99661582	+	12
chr10	101785970	101786003	-	12
chr10	126155224	126155244	-	12
chr11	831827	831858	+	12
chr11	10800794	10800838	-	12
chr11	20118953	20118985	+	12
chr11	44245237	44245260	+	12
chr11	57300055	57300072	-	12
chr11	63628807	63628845	-	12
chr11	65351966	65351985	+	12
chr11	65892162	65892217	-	12
chr11	77322720	77322740	-	12
chr11	123057665	123057697	-	12
chr12	2857948	2857987	-	12
chr12	2858524	2858587	-	12
chr12	13216056	13216101	+	12
chr12	26965326	26965351	+	12
chr12	49762891	49762942	+	12
chr12	56144445	56144502	+	12
chr12	56210500	56210537	-	12
chr12	56713636	56713663	-	12
chr12	75490400	75490451	+	12
chr12	89349515	89349535	-	12
chr12	108646668	108646715	-	12
chr12	112502167	112502191	+	12
chr12	132754692	132754725	-	12
chr13	77044775	77044802	-	12
chr13	98016711	98016767	+	12
chr13	110523230	110523266	-	12
chr14	22846542	22846577	+	12
chr14	49895711	49895734	+	12
chr14	50188493	50188512	-	12
chr14	54940702	54940728	-	12
chr14	69380214	69380249	-	12
chr14	69380261	69380286	-	12
chr14	73222876	73222895	+	12
chr14	75132359	75132378	-	12
chr14	75134482	75134512	-	12
chr14	75745510	75745535	+	12
chr14	88572976	88573003	+	12
chr14	102084837	102084895	-	12
chr14	103503773	103503792	+	12
chr15	41669710	41669731	+	12
chr15	48503838	48503884	-	12
chr15	51466260	51466283	-	12
chr15	60347554	60347611	-	12
chr15	72210418	72210493	-	12
chr16	28177279	28177309	-	12
chr16	66723124	66723155	-	12
chr16	74305920	74305962	+	12
chr16	74652014	74652061	-	12
chr16	85779614	85779647	-	12
chr17	28860874	28860917	+	12
chr17	50072149	50072172	+	12
chr17	50188739	50188771	-	12
chr18	9860367	9860417	+	12
chr18	21869082	21869148	+	12
chr18	23529325	23529368	-	12
chr19	2434049	2434078	-	12
chr19	3468433	3468471	+	12
chr19	3542973	3543004	-	12
chr19	11357716	11357738	+	12
chr19	15115085	15115127	-	12
chr19	17581916	17581958	+	12
chr19	19198155	19198191	+	12
chr19	41260098	41260116	+	12
chr19	41261421	41261468	+	12
chr19	46920632	46920661	+	12
chr19	55385921	55385966	+	12
chr2	11551725	11551744	+	12
chr2	32220999	32221046	+	12
chr2	36555705	36555724	-	12
chr2	54456442	54456467	+	12
chr2	85321201	85321230	-	12
chr2	121767136	121767168	+	12
chr2	170966220	170966255	+	12
chr2	173222303	173222332	+	12
chr2	215406283	215406316	-	12
chr2	237366690	237366724	-	12
chr2	241262823	241262861	-	12
chr2	241266844	241266873	-	12
chr20	31665637	31665663	-	12
chr20	45946353	45946379	+	12
chr20	50557881	50557913	-	12
chr20	58909977	58910011	+	12
chr21	18270098	18270136	-	12
chr21	18379280	18379318	-	12
chr21	33530816	33530847	-	12
chr21	34791428	34791450	-	12
chr21	41885530	41885552	-	12
chr22	20951101	20951134	+	12
chr22	24542813	24542848	-	12
chr22	38483597	38483626	-	12
chr22	42070324	42070361	-	12
chr3	45225002	45225033	-	12
chr3	49015875	49015910	+	12
chr3	49117801	49117826	-	12
chr3	55467030	55467063	-	12
chr3	57270027	57270063	+	12
chr3	57571501	57571539	-	12
chr3	98798535	98798557	-	12
chr3	128070998	128071030	+	12
chr3	136854697	136854736	+	12
chr3	170091164	170091184	-	12
chr3	177021857	177021882	-	12
chr3	189794920	189794937	+	12
chr3	196049885	196049926	-	12
chr4	1975357	1975378	+	12
chr4	7762314	7762351	-	12
chr4	77038000	77038068	+	12
chr4	119297840	119297876	-	12
chr5	72197260	72197292	+	12
chr5	72208381	72208410	+	12
chr5	72208543	72208591	+	12
chr5	74636085	74636109	-	12
chr5	79981332	79981368	-	12
chr5	132217297	132217347	-	12
chr5	141980176	141980202	+	12
chr5	143279962	143279986	-	12
chr5	151663297	151663331	-	12
chr5	151805725	151805770	+	12
chr6	17551495	17551515	+	12
chr6	26204913	26204979	+	12
chr6	32852393	32852419	-	12
chr6	44251080	44251101	+	12
chr6	106530278	106530313	+	12
chr6	130840216	130840254	-	12
chr7	25123459	25123496	-	12
chr7	101138008	101138039	+	12
chr7	101161119	101161159	+	12
chr7	128769719	128769779	+	12
chr7	128770326	128770363	+	12
chr7	128854664	128854684	+	12
chr7	128858855	128858879	+	12
chr7	129831444	129831490	-	12
chr7	130166176	130166214	-	12
chr7	139422798	139422821	+	12
chr8	18531773	18531795	-	12
chr8	22422083	22422143	+	12
chr8	38848186	38848212	+	12
chr8	61625711	61625767	-	12
chr8	78718735	78718755	+	12
chr8	102214054	102214085	-	12
chr8	121815621	121815646	+	12
chr9	33112333	33112358	-	12
chr9	36191011	36191046	+	12
chr9	87731303	87731354	+	12
chr9	92038242	92038297	-	12
chr9	93565272	93565330	+	12
chr9	127505833	127505913	-	12
chr9	128693936	128693989	+	12
chr9	137449157	137449220	-	12
chrM	10068	10087	+	12
chrM	10899	10934	+	12
chrM	15503	15577	+	12
chrX	12975129	12975162	+	12
chrX	71420457	71420476	-	12
chrX	78125980	78126030	+	12
chrX	154449362	154449382	+	12
chr1	1786193	1786233	-	11
chr1	16447869	16447894	+	11
chr1	24842570	24842598	+	11
chr1	27306710	27306734	+	11
chr1	32775942	32775978	-	11
chr1	43360369	43360393	+	11
chr1	47377427	47377509	+	11
chr1	51399026	51399046	-	11
chr1	68148564	68148631	-	11
chr1	70251901	70251948	+	11
chr1	109062901	109062951	-	11
chr1	110022466	110022513	+	11
chr1	111703375	111703398	+	11
chr1	113974404	113974444	+	11
chr1	114734475	114734497	-	11
chr1	119914692	119914760	-	11
chr1	151401292	151401317	+	11
chr1	154157469	154157499	-	11
chr1	159918638	159918701	-	11
chr1	183626830	183626849	-	11
chr10	5918358	5918395	+	11
chr10	12035429	12035448	-	11
chr10	17229904	17229944	+	11
chr10	28533641	28533661	+	11
chr10	29421509	29421560	+	11
chr10	29421754	29421773	+	11
chr10	71816723	71816750	-	11
chr10	71821929	71821965	-	11
chr10	73783192	73783210	+	11
chr10	96528041	96528068	-	11
chr11	831867	831912	+	11
chr11	3731393	3731418	-	11
chr11	10797448	10797512	-	11
chr11	10808769	10808806	-	11
chr11	18396910	18396942	+	11
chr11	44244596	44244617	+	11
chr11	57334524	57334566	-	11
chr11	59575368	59575389	-	11
chr11	70435430	70435463	+	11
chr11	78417726	78417743	+	11
chr12	6965521	6965549	-	11
chr12	45430576	45430624	+	11
chr12	49763939	49763972	+	11
chr12	49764164	49764197	+	11
chr12	49764482	49764528	+	11
chr12	51026557	51026575	-	11
chr12	56663675	56663707	-	11
chr12	109449348	109449401	-	11
chr12	118033753	118033782	-	11
chr12	120199385	120199430	-	11
chr12	123597653	123597706	+	11
chr13	76884984	76885002	-	11
chr13	91354219	91354253	+	11
chr14	22846608	22846654	+	11
chr14	55148186	55148242	-	11
chr14	69380298	69380325	-	11
chr14	73712961	73712992	-	11
chr14	74500096	74500130	-	11
chr14	96535917	96535973	+	11
chr14	100279708	100279728	+	11
chr14	102000983	102001044	+	11
chr14	102004759	102004787	+	11
chr14	104755712	104755744	+	11
chr14	104940651	104940704	-	11
chr14	104940808	104940847	-	11
chr14	104945164	104945197	-	11
chr15	43528429	43528482	+	11
chr15	63323964	63324036	-	11
chr15	72199065	72199133	-	11
chr15	72200545	72200575	-	11
chr15	100916255	100916298	+	11
chr16	1325115	1325173	+	11
chr16	67198459	67198478	+	11
chr16	71730630	71730667	-	11
chr16	74447874	74447914	-	11
chr17	4948490	4948519	-	11
chr17	4980246	4980293	-	11
chr17	21002546	21002585	-	11
chr17	39995429	39995525	+	11
chr17	40389126	40389159	-	11
chr17	42404317	42404360	-	11
chr17	42404384	42404416	-	11
chr17	43211152	43211208	+	11
chr17	45107730	45107770	+	11
chr17	50193003	50193024	-	11
chr17	58491191	58491216	-	11
chr17	59681432	59681467	+	11
chr17	60786221	60786246	+	11
chr17	77191194	77191218	+	11
chr18	723826	723847	-	11
chr18	12326004	12326022	+	11
chr18	56753254	56753271	-	11
chr18	59329939	59329985	-	11
chr19	583161	583205	+	11
chr19	3209410	3209428	+	11
chr19	3976120	3976148	-	11
chr19	3976304	3976334	-	11
chr19	3983106	3983150	-	11
chr19	4794978	4795000	+	11
chr19	7963359	7963386	-	11
chr19	13139507	13139546	+	11
chr19	18532034	18532097	-	11
chr19	19506468	19506516	+	11
chr19	41238483	41238546	+	11
chr19	47000910	47000932	+	11
chr2	9630190	9630257	-	11
chr2	10448223	10448281	-	11
chr2	20202145	20202166	-	11
chr2	28869727	28869758	-	11
chr2	32499984	32500024	+	11
chr2	50936218	50936238	-	11
chr2	54456372	54456409	+	11
chr2	54972927	54972974	-	11
chr2	70278742	70278775	+	11
chr2	97802475	97802521	-	11
chr2	101888835	101888855	+	11
chr2	101892453	101892504	+	11
chr2	130966878	130966897	+	11
chr2	131048859	131048898	-	11
chr2	131149707	131149748	+	11
chr2	173190889	173190926	+	11
chr2	205354219	205354237	+	11
chr2	205743328	205743353	+	11
chr2	215404528	215404552	-	11
chr2	215407133	215407185	-	11
chr2	215430786	215430850	-	11
chr2	216499343	216499403	+	11
chr2	231456634	231456667	-	11
chr2	234495708	234495743	-	11
chr2	235041474	235041518	+	11
chr2	237377169	237377213	-	11
chr2	237378843	237378863	-	11
chr2	241255454	241255509	-	11
chr20	10639097	10639120	-	11
chr20	35626582	35626612	-	11
chr20	36046884	36046907	-	11
chr20	44907736	44907781	+	11
chr20	45078570	45078592	+	11
chr20	45327089	45327136	-	11
chr21	41168532	41168572	+	11
chr21	43758868	43758905	+	11
chr21	46125472	46125512	+	11
chr22	21769302	21769333	-	11
chr22	27851861	27851901	-	11
chr22	35394080	35394101	+	11
chr22	36281397	36281428	-	11
chr22	36281993	36282047	-	11
chr22	39521428	39521463	+	11
chr22	41434596	41434636	-	11
chr22	46686692	46686726	-	11
chr3	31636808	31636881	+	11
chr3	45677533	45677552	+	11
chr3	51394067	51394094	+	11
chr3	51674454	51674481	+	11
chr3	57270072	57270113	+	11
chr3	72375709	72375732	-	11
chr3	98881700	98881730	-	11
chr3	113810038	113810062	+	11
chr3	120328600	120328636	-	11
chr3	123613845	123613900	-	11
chr3	128620561	128620596	-	11
chr3	130998358	130998385	+	11
chr3	141925863	141925925	+	11
chr3	156542853	156542879	-	11
chr3	161250957	161250983	+	11
chr3	169994528	169994555	+	11
chr3	184180214	184180239	+	11
chr3	194431101	194431140	-	11
[truncated: 13,871 more rows]

## Sheet: Dataset S4
Rep1_DeltaNTR_siCTRL_protrusion / Rep1_DeltaNTR_siCTRL_body	Rep1_DeltaNTR_siLARP6_protrusion / Rep1_DeltaNTR_siLARP6_body	Rep1_FL_siCTRL_protrusion / Rep1_FL_siCTRL_body	Rep1_FL_siLARP6_protrusion / Rep1_FL_siLARP6_body	Rep1_U87_siCTRL_protrusion / Rep1_U87_siCTRL_body	Rep1_U87_siLARP6_protrusion / Rep1_U87_siLARP6_body	Rep2_DeltaNTR_siCTRL_protrusion / Rep2_DeltaNTR_siCTRL_body	Rep2_DeltaNTR_siLARP6_protrusion / Rep2_DeltaNTR_siLARP6_body	Rep2_FL_siCTRL_protrusion / Rep2_FL_siCTRL_body	Rep2_FL_siLARP6_protrusion / Rep2_FL_siLARP6_body	Rep2_U87_siCTRL_protrusion / Rep2_U87_siCTRL_body	Rep2_U87_siLARP6_protrusion / Rep2_U87_siLARP6_body	Rep3_DeltaNTR_siCTRL_protrusion / Rep3_DeltaNTR_siCTRL_body	Rep3_DeltaNTR_siLARP6_protrusion / Rep3_DeltaNTR_siLARP6_body	Rep3_FL_siCTRL_protrusion / Rep3_FL_siCTRL_body	Rep3_FL_siLARP6_protrusion / Rep3_FL_siLARP6_body	Rep3_U87_siCTRL_protrusion / Rep3_U87_siCTRL_body	Rep3_U87_siLARP6_protrusion / Rep3_U87_siLARP6_body	GOBP name	GOMF name	GOCC name	KEGG name	gene	gene_id	ENSP	Uniprot	Gene name	Protein name
-0.452656	-0.880852	-0.22341	-0.743028	-0.0735378	-0.2774	-0.836231	-1.02691	-0.157233	-0.817083	-0.248518	-0.263389	-1.19006	-0.944054	-0.505383	-0.771771	-0.285826	-0.114242	biological regulation;cellular process;cellular response to stimulus;positive regulation of biological process;positive regulation of cell communication;positive regulation of cellular process;positive regulation of I-kappaB kinase/NF-kappaB cascade;positive regulation of intracellular protein kinase cascade;positive regulation of response to stimulus;positive regulation of signal transduction;po…	molecular transducer activity;signal transducer activity	cell part;extracellular membrane-bounded organelle;extracellular organelle;extracellular region part;extracellular vesicular exosome;integral to membrane;intrinsic to membrane;membrane part;membrane-bounded organelle;membrane-bounded vesicle;organelle;vesicle		TSPAN6	ENSG00000000003	ENSP00000362111;ENSP00000482130;ENSP00000482894	A0A087WYV6;A0A087WZU5;O43657;Q54A42;Q6IAN9	TSPAN6	Tetraspanin-6
0.468645	0.190442	0.10675	0.134208	0.134429	-0.186958	0.221152	0.0634587	0.249973	-0.0366337	0.22549	0.121087	-0.0981517	0.13653	0.231451	-0.0411549	0.187595	0.00145078	alcohol metabolic process;biosynthetic process;carbohydrate biosynthetic process;carbohydrate metabolic process;cellular biosynthetic process;cellular carbohydrate metabolic process;cellular lipid metabolic process;cellular macromolecule metabolic process;cellular metabolic process;cellular nitrogen compound metabolic process;cellular process;cellular protein metabolic process;C-terminal protein …	alcohol binding;binding;carbohydrate binding;catalytic activity;dolichyl-phosphate beta-D-mannosyltransferase activity;dolichyl-phosphate-mannose-protein mannosyltransferase activity;mannose binding;mannosyltransferase activity;monosaccharide binding;sugar binding;transferase activity;transferase activity, transferring glycosyl groups;transferase activity, transferring hexosyl groups	cell part;cytoplasmic part;dolichol-phosphate-mannose synthase complex;endoplasmic reticulum;endoplasmic reticulum membrane;endoplasmic reticulum part;intracellular membrane-bounded organelle;intracellular organelle;intracellular organelle part;intracellular part;macromolecular complex;mannosyltransferase complex;membrane;membrane part;membrane-bounded organelle;nucleus;organelle;organelle membra…	N-Glycan biosynthesis	DPM1	ENSG00000000419	ENSP00000360638;ENSP00000360640;ENSP00000360644;ENSP00000394921	H0Y368;O15157;O60762;Q5QPJ9;Q5QPK2;Q6IB78;Q96HK0	DPM1	Dolichol-phosphate mannosyltransferase subunit 1
-0.528766	-0.404928	-0.08461	-0.055387	-0.209454	0.169588	-0.519375	-1.38248	-0.0982077	-0.291369	0.187871	0.0245323	-0.544199	0.1042	-0.146761	0.106606	0.0148845	0.274588	cell migration;cell motility;cellular component movement;cellular macromolecule metabolic process;cellular metabolic process;cellular process;cellular protein metabolic process;locomotion;macromolecule metabolic process;macromolecule modification;metabolic process;phosphate-containing compound metabolic process;phosphorus metabolic process;phosphorylation;primary metabolic process;protein metabol…	adenyl nucleotide binding;adenyl ribonucleotide binding;ATP binding;binding;catalytic activity;kinase activity;nucleotide binding;phosphotransferase activity, alcohol group as acceptor;protein kinase activity;purine nucleotide binding;purine ribonucleoside triphosphate binding;purine ribonucleotide binding;ribonucleotide binding;transferase activity;transferase activity, transferring phosphorus-c…	cell part;cell projection;cytoplasm;cytoplasmic part;Golgi apparatus;intracellular membrane-bounded organelle;intracellular organelle;intracellular part;lamellipodium;membrane-bounded organelle;organelle		SCYL3	ENSG00000000457	ENSP00000356744;ENSP00000356745;ENSP00000356746;ENSP00000407993	A8K8Z2;Q5THA6;Q5THA8;Q8IZE3;Q8IZN9;Q96C56;Q9UBK6;X6RHX1	SCYL3	Protein-associating with the carboxyl-terminal domain of ezrin
-0.169074	0.407238	-0.448991	-0.523147	-0.29363	-0.388516	-0.242196	-1.08799	-0.0544794	-0.80481	0.250308	0.264972	-0.390706	-0.702465	-0.404714	-0.626171	0.0360222	-0.0319121					C1orf112	ENSG00000000460	ENSP00000286031;ENSP00000352276;ENSP00000389257	A6NFP1;B3KU42;Q3KNQ1;Q9H8L5;Q9NSG2;Q9NVJ0	C1orf112	Uncharacterized protein C1orf112
-1.23387	-1.08313	-0.48369	-0.888367	-0.302563	-0.242887	-1.62629	-0.603765	-0.994764	-0.650898	0.544441	-0.292874	-0.948348	-1.12696	0.283175	-0.924829	-0.295456	-0.45889	activation of immune response;biological regulation;complement activation;complement activation, alternative pathway;defense response;humoral immune response;immune effector process;immune response;immune system process;innate immune response;macromolecule metabolic process;metabolic process;positive regulation of biological process;positive regulation of immune response;positive regulation of im…	binding;carbohydrate binding;glycoprotein binding;glycosaminoglycan binding;heparan sulfate proteoglycan binding;heparin binding;pattern binding;polysaccharide binding;protein binding;proteoglycan binding	blood microparticle;extracellular membrane-bounded organelle;extracellular organelle;extracellular region;extracellular region part;extracellular space;extracellular vesicular exosome;membrane-bounded organelle;membrane-bounded vesicle;organelle;vesicle	Complement and coagulation cascades;Staphylococcus aureus infection	CFH	ENSG00000000971	ENSP00000352658;ENSP00000356399;ENSP00000487250	A0A0D9SG88;A5PL14;P08603;P78435;Q14570;Q2TAZ5;Q38G77;Q5TFM2;Q5TFM3;Q8N708;Q9NU86	CFH	Complement factor H
-0.823864	-0.450648	-0.601578	-0.802111	-0.555229	-0.379259	-1.13087	-0.397171	-0.693151	-0.602582	-0.182402	-0.268168	-1.3006	-0.561763	-0.611681	-0.685926	-0.1015	-0.241701	alcohol metabolic process;biological regulation;carbohydrate catabolic process;carbohydrate metabolic process;catabolic process;cellular carbohydrate catabolic process;cellular carbohydrate metabolic process;cellular metabolic process;cellular process;fucose metabolic process;glycoside catabolic process;glycoside metabolic process;hexose metabolic process;metabolic process;monosaccharide metaboli…	alpha-L-fucosidase activity;binding;carbohydrate binding;catalytic activity;fucose binding;fucosidase activity;hydrolase activity;hydrolase activity, acting on glycosyl bonds;hydrolase activity, hydrolyzing O-glycosyl compounds;monosaccharide binding;sugar binding	cell part;cytoplasmic part;extracellular membrane-bounded organelle;extracellular organelle;extracellular region part;extracellular space;extracellular vesicular exosome;intracellular membrane-bounded organelle;intracellular organelle;intracellular part;lysosome;lytic vacuole;membrane-bounded organelle;membrane-bounded vesicle;organelle;vacuole;vesicle	Other glycan degradation	FUCA2	ENSG00000001036	ENSP00000002165;ENSP00000398119	E9PEB6;Q7Z6V1;Q7Z6V2;Q7Z6Y2;Q8NBK4;Q9BTY2	FUCA2	Plasma alpha-L-fucosidase
0.242894	-0.0644779	0.162994	0.332001	0.0673866	0.124738	0.105116	0.326527	-0.148817	0.143443	-0.0660777	0.224831	-0.119936	0.24857	0.0279174	0.304725	0.0803385	0.152954	amine biosynthetic process;amine metabolic process;apoptotic mitochondrial changes;biological regulation;biosynthetic process;carboxylic acid biosynthetic process;carboxylic acid metabolic process;cell redox homeostasis;cellular amine metabolic process;cellular amino acid biosynthetic process;cellular amino acid metabolic process;cellular biosynthetic process;cellular component organization;cellu…	acid-amino acid ligase activity;adenyl nucleotide binding;adenyl ribonucleotide binding;ADP binding;amine binding;amino acid binding;ATP binding;binding;carboxylic acid binding;catalytic activity;cation binding;coenzyme binding;cofactor binding;glutamate binding;glutamate-cysteine ligase activity;ion binding;ligase activity;ligase activity, forming carbon-nitrogen bonds;magnesium ion binding;meta…	cell part;cytoplasmic part;cytosol;glutamate-cysteine ligase complex;intracellular part;macromolecular complex;protein complex	Glutathione metabolism	GCLC	ENSG00000001084	ENSP00000229416;ENSP00000421228;ENSP00000421629;ENSP00000421908;ENSP00000423615;ENSP00000424211;ENSP00000426578;ENSP00000427403;ENSP00000482756	A0A0C4DGB2;D6R959;D6REX4;D6RGF8;D6RIT4;E1CEI4;H0Y9I7;H0YAB6;P48506;Q14399	GCLC	Glutamate--cysteine ligase catalytic subunit
0.088824	0.00912809	-0.472387	-0.187212	-0.244848	-0.0750351	0.254858	0.310286	-0.264684	-0.201242	0.471462	0.125568	-0.598405	0.125256	-0.194475	-0.0555062	-0.141675	-0.0925467	biological regulation;biosynthetic process;cellular biosynthetic process;cellular macromolecule biosynthetic process;cellular macromolecule metabolic process;cellular metabolic process;cellular nitrogen compound metabolic process;cellular process;macromolecule biosynthetic process;macromolecule metabolic process;metabolic process;nitrogen compound metabolic process;nucleic acid metabolic process;…	binding;core promoter binding;core promoter sequence-specific DNA binding;DNA binding;nucleic acid binding;nucleic acid binding transcription factor activity;regulatory region DNA binding;regulatory region nucleic acid binding;sequence-specific DNA binding;sequence-specific DNA binding transcription factor activity;transcription regulatory region DNA binding;transcription regulatory region sequen…	CCAAT-binding factor complex;cell part;intracellular membrane-bounded organelle;intracellular organelle;intracellular organelle part;intracellular part;macromolecular complex;membrane-bounded organelle;nuclear part;nucleoplasm;nucleoplasm part;nucleus;organelle;organelle part;protein complex;protein-DNA complex;transcription factor complex	Antigen processing and presentation;ko05152	NFYA	ENSG00000001167	ENSP00000229418;ENSP00000345702	P23511;Q8IXU0	NFYA	Nuclear transcription factor Y subunit alpha
-0.127668	-1.49608	-0.0237441	-0.139545	-0.636982	0.300832	0.2493	0.215768	-0.15492	-0.310799	-0.123578	-0.0962152	0.151188	-0.21166	0.082365	1.01152	-0.0346775	0.513106	apoptosis;cell death;cellular process;death;programmed cell death		cell part;cytoplasm;intracellular membrane-bounded organelle;intracellular organelle;intracellular part;membrane-bounded organelle;nucleus;organelle		STPG1	ENSG00000001460	ENSP00000003583;ENSP00000337461;ENSP00000363530;ENSP00000392225;ENSP00000416176	H0Y4J3;Q49AP0;Q5TH74;Q5TH77;Q6P3R4;Q86VU9;Q8WVQ3	STPG1	O(6)-methylguanine-induced apoptosis 2
-0.596144	-0.413135	-0.234625	-0.440639	-0.329231	-0.0478096	-0.0529268	0.0131609	-0.312218	-0.0416653	-0.425626	-0.0621562	-0.0293841	-0.184206	-0.238308	-0.20162	-0.0359564	-0.352636		cation transmembrane transporter activity;divalent inorganic cation transmembrane transporter activity;inorganic cation transmembrane transporter activity;ion transmembrane transporter activity;magnesium ion transmembrane transporter activity;metal ion transmembrane transporter activity;substrate-specific transmembrane transporter activity;substrate-specific transporter activity;transmembrane tra…	cell part;integral to membrane;intrinsic to membrane;membrane part		NIPAL3	ENSG00000001461	ENSP00000003912;ENSP00000343549;ENSP00000350722;ENSP00000363520;ENSP00000392170	A2A298;A6NN97;A8MPU6;H0Y4I9;Q5TH81;Q6MZT9;Q6P499;Q9BVE6	NIPAL3	NIPA-like protein 3
0.237464	0.185796	0.261602	0.333791	0.155836	-0.0527172	0.14055	-0.13965	-0.0305445	-0.0377848	-0.131254	0.0716672	-0.0187373	-0.120077	-0.342726	-0.175728	-0.0041151	0.112809	cellular macromolecule metabolic process;cellular metabolic process;cellular nitrogen compound metabolic process;cellular process;macromolecule metabolic process;metabolic process;ncRNA metabolic process;ncRNA processing;nitrogen compound metabolic process;nucleic acid metabolic process;nucleobase-containing compound metabolic process;primary metabolic process;RNA metabolic process;RNA processing…		cell part;cytoplasm;cytoplasmic part;cytoskeletal part;histone methyltransferase complex;intracellular non-membrane-bounded organelle;intracellular organelle;intracellular organelle part;intracellular part;macromolecular complex;membrane;methyltransferase complex;microtubule organizing center;MLL1 complex;non-membrane-bounded organelle;nuclear part;nucleolus;nucleoplasm;nucleoplasm part;organelle…		LAS1L	ENSG00000001497	ENSP00000363937;ENSP00000363940;ENSP00000363944;ENSP00000473471;ENSP00000473630	A9X410;Q5JXQ0;Q8TEN5;Q9H9V5;Q9Y4W2;R4GNF7	LAS1L	Ribosomal biogenesis protein LAS1L
-0.831466	-0.696835	-0.466056	-0.355387	-0.0931096	-0.0496221	-0.696913	-0.915212	-0.908983	-0.868426	-0.232989	-0.232879	-1.34994	-1.44658	-0.760579	-0.885091	-0.559933	-0.265587	biological regulation;blood coagulation;catabolic process;cellular catabolic process;cellular metabolic process;cellular nitrogen compound catabolic process;cellular nitrogen compound metabolic process;cellular process;coagulation;hemostasis;heterocycle catabolic process;heterocycle metabolic process;metabolic process;multicellular organismal process;nitrogen compound metabolic process;nucleobase…	binding;bis(5'-adenosyl)-triphosphatase activity;catalytic activity;cation binding;hydrolase activity;hydrolase activity, acting on acid anhydrides;hydrolase activity, acting on acid anhydrides, in phosphorus-containing anhydrides;ion binding;metal ion binding;nucleotide diphosphatase activity;pyrophosphatase activity	cell part;extracellular membrane-bounded organelle;extracellular organelle;extracellular region part;extracellular vesicular exosome;integral to membrane;intrinsic to membrane;membrane;membrane part;membrane-bounded organelle;membrane-bounded vesicle;organelle;plasma membrane;vesicle		ENPP4	ENSG00000001561	ENSP00000318066	A8K5G1;Q7L2N1;Q9Y6X5	ENPP4	Bis(5'-adenosyl)-triphosphatase ENPP4
0.0601609	-0.138542	0.16636	0.152293	0.0472054	0.184438	-0.229401	0.0651972	-0.346339	-0.120183	-0.0367112	-0.112304	0.246178	0.231003	0.100935	-0.0587902	-0.283872	-0.66609		binding;cation binding;ion binding;metal ion binding;transition metal ion binding;zinc ion binding			ANKIB1	ENSG00000001629	ENSP00000265742;ENSP00000396406;ENSP00000406644;ENSP00000407002;ENSP00000407913	C9JZ63;H7C0S0;H7C2L9;H7C2V2;Q6GMS4;Q6P3S9;Q9NTD7;Q9NW49;Q9P2G1	ANKIB1	Ankyrin repeat and IBR domain-containing protein 1
-1.56507	-1.27206	-0.875056	-0.425155	-0.530638	-0.311439	-1.56852	-0.837358	-0.818592	-0.737535	-0.507791	-0.564651	-1.80423	-1.20557	-0.964046	-0.861898	-1.01306	-0.904984	anatomical structure formation involved in morphogenesis;angiogenesis;biological regulation;cell redox homeostasis;cellular homeostasis;cellular process;cellular response to stimulus;developmental process;homeostatic process;intracellular signal transduction;negative regulation of angiogenesis;negative regulation of apoptosis;negative regulation of biological process;negative regulation of cell d…	binding;cytoskeletal protein binding;enzyme regulator activity;GTPase regulator activity;lipid binding;microtubule binding;nucleoside-triphosphatase regulator activity;phosphatidylinositol binding;phosphatidylinositol-4,5-bisphosphate binding;phospholipid binding;protein binding;protein complex binding;tubulin binding	cell junction;cell part;cell-cell junction;cytoplasm;cytoskeletal part;cytoskeleton;extracellular region part;extracellular space;intracellular non-membrane-bounded organelle;intracellular organelle;intracellular organelle part;intracellular part;macromolecular complex;membrane;microtubule;non-membrane-bounded organelle;organelle;organelle part;plasma membrane;protein complex		KRIT1	ENSG00000001631	ENSP00000344668;ENSP00000378011;ENSP00000378013;ENSP00000378015;ENSP00000388076;ENSP00000391540;ENSP00000391675;ENSP00000395346;ENSP00000395604;ENSP00000396042;ENSP00000396352;ENSP00000404084;ENSP00000404790;ENSP00000405835;ENSP00000410104;ENSP00000410467;ENSP00000410909;ENSP00000414694;ENSP00000478777	A0A0B4J2C7;A0A0C4DG23;A6NNU0;C9J3W7;C9J718;C9JBN7;C9JD43;C9JD81;C9JEW7;C9JF32;C9JI47;C9JIY2;C9JJM9;C9JSG7;C9JXI9;O00522;O43894;Q506L6;Q6U276;Q75N19;Q9H180;Q9H264;Q9HAX5	KRIT1	Krev interaction trapped protein 1
-1.12767	-0.319198	-0.686446	-0.367784	-0.614507	0.0858188	-0.951091	-0.192214	-1.04277	-0.978003	-0.348644	-0.481533	-0.390706	1.51689	-0.617418	-0.380346	-0.28396	-0.732651	biological regulation;catabolic process;cellular catabolic process;cellular component assembly;cellular component assembly at cellular level;cellular component organization;cellular component organization at cellular level;cellular component organization or biogenesis;cellular component organization or biogenesis at cellular level;cellular macromolecular complex assembly;cellular macromolecular c…	binding;catalytic activity;DNA binding;identical protein binding;nucleic acid binding;protein binding;recombinase activity	cell part;intracellular membrane-bounded organelle;intracellular organelle;intracellular organelle part;intracellular part;membrane-bounded organelle;nuclear part;nucleoplasm;nucleus;organelle;organelle part	Homologous recombination	RAD52	ENSG00000002016	ENSP00000351284;ENSP00000380407;ENSP00000387901;ENSP00000434703;ENSP00000436008;ENSP00000438965;ENSP00000439583;ENSP00000440268;ENSP00000440486;ENSP00000441073;ENSP00000443254;ENSP00000445245	E9PF95;F5GX32;F5GX95;F5H1K5;F5H3Q1;P43351;Q13205;Q9Y5T7;Q9Y5T8;Q9Y5T9	RAD52	DNA repair protein RAD52 homolog
0.742133	0.441024	0.321211	0.960413	0.348515	0.0348349	0.431952	0.497372	0.380451	0.687597	0.461337	0.270201	0.0812745	0.499476	0.386877	0.54659	0.747328	0.224895	activation of caspase activity;ADP metabolic process;alcohol catabolic process;alcohol metabolic process;apoptosis;apoptotic mitochondrial changes;ATP metabolic process;biological regulation;carbohydrate catabolic process;carbohydrate homeostasis;carbohydrate metabolic process;catabolic process;cell death;cell proliferation;cell surface receptor linked signaling pathway;cellular carbohydrate cata…	apoptotic protease activator activity;binding;caspase activator activity;caspase regulator activity;enzyme activator activity;enzyme binding;enzyme regulator activity;kinase binding;lipid binding;peptidase activator activity;peptidase regulator activity;phospholipid binding;protein binding;protein kinase binding	cell part;cytoplasmic part;cytosol;intracellular membrane-bounded organelle;intracellular organelle;intracellular organelle part;intracellular part;membrane;membrane-bounded organelle;mitochondrial membrane;mitochondrial outer membrane;mitochondrial part;mitochondrion;organelle;organelle membrane;organelle outer membrane;organelle part;outer membrane	Acute myeloid leukemia;Alzheimer's disease;Amyotrophic lateral sclerosis (ALS);Apoptosis;Chronic myeloid leukemia;Colorectal cancer;Endometrial cancer;ErbB signaling pathway;Focal adhesion;Hepatitis C;Insulin signaling pathway;ko05152;Melanoma;Neurotrophin signaling pathway;Non-small cell lung cancer;Pancreatic cancer;Pathways in cancer;Prostate cancer;Toxoplasmosis;VEGF signaling pathway	BAD	ENSG00000002330	ENSP00000309103;ENSP00000378039;ENSP00000378040;ENSP00000438975;ENSP00000439202;ENSP00000440575	A8MXU7;F5GYS3;F5H1R6;F5H3B1;O14803;Q6FH21;Q92934	BAD	Bcl2-associated agonist of cell death
0.343573	0.318232	0.325249	0.48859	-0.197767	-0.052103	0.116627	-0.25308	-0.0983078	0.0183027	-0.0382123	-0.286677	0.479441	0.360551	-0.0295434	0.103333	0.00858498	-0.433584	macromolecule metabolic process;metabolic process;primary metabolic process;protein metabolic process;proteolysis	aminopeptidase activity;binding;catalytic activity;cation binding;exopeptidase activity;hydrolase activity;ion binding;manganese ion binding;metal ion binding;metalloexopeptidase activity;metallopeptidase activity;peptidase activity;peptidase activity, acting on L-amino acid peptides;transition metal ion binding	adherens junction;anchoring junction;cell junction;cell part;cell-substrate adherens junction;cell-substrate junction;cytoplasm;cytoplasmic part;extracellular membrane-bounded organelle;extracellular organelle;extracellular region part;extracellular vesicular exosome;focal adhesion;Golgi apparatus part;intracellular membrane-bounded organelle;intracellular organelle;intracellular organelle part;i…	Arginine and proline metabolism;Glutathione metabolism	LAP3	ENSG00000002549	ENSP00000226299;ENSP00000423350;ENSP00000424724;ENSP00000476028;ENSP00000481000	B3KMQ3;H0Y983;H0Y9Q1;P28838;Q6IAM6;Q6P0L6;Q9UQE3	LAP3	Cytosol aminopeptidase
-0.210613	-0.209808	-0.146722	-0.168352	-0.151342	-0.198603	-0.32235	-0.260103	-0.10669	-0.19564	0.0882878	0.0141664	-0.436317	-0.129838	-0.26067	-0.242441	-0.0109377	0.00118184	biological adhesion;cell adhesion;cellular process		adherens junction;anchoring junction;cell junction;cell part;cell-substrate adherens junction;cell-substrate junction;cytoplasm;focal adhesion;integral to membrane;integral to plasma membrane;intracellular part;intrinsic to membrane;intrinsic to plasma membrane;membrane;membrane part;plasma membrane;plasma membrane part	Cell adhesion molecules (CAMs);Leukocyte transendothelial migration	CD99	ENSG00000002586	ENSP00000370570;ENSP00000370573;ENSP00000370579;ENSP00000370582;ENSP00000370588;ENSP00000405544;ENSP00000479999;ENSP00000485427;ENSP00000485545	A0A096LP69;A6NGF6;A6NIW1;A6NJT9;A8MQT7;H7C2F2;O00518;P14209;Q6ICV7	CD99	CD99 antigen
-0.284965	-0.461216	0.308068	0.286719	0.397877	-0.0594134	-0.282934	0.251392	-0.264314	-0.0849183	0.375964	-0.588846	-0.197707	0.685951	-0.0110769	0.0913639	0.629563	-0.192294	biological regulation;cellular macromolecule metabolic process;cellular metabolic process;cellular process;cellular protein metabolic process;macromolecule metabolic process;macromolecule modification;metabolic process;negative regulation of biological process;negative regulation of canonical Wnt receptor signaling pathway;negative regulation of cell communication;negative regulation of cellular …	acid-amino acid ligase activity;catalytic activity;ligase activity;ligase activity, forming carbon-nitrogen bonds;small conjugating protein ligase activity;ubiquitin-protein ligase activity	cell part;cytoplasmic part;cytosol;intracellular part		HECW1	ENSG00000002746	ENSP00000379228;ENSP00000407774;ENSP00000413336	A7E2X0;A8MYS3;B4DH42;H7C3Q2;O15036;Q76N89;Q9HCC7	HECW1	E3 ubiquitin-protein ligase HECW1
0.242171	0.186433	0.252537	0.1409	0.214041	0.250083	0.273452	0.32284	0.300564	0.245919	0.261086	0.133924	0.33175	0.0825412	0.310441	0.300935	0.359282	0.589862	biological regulation;establishment of localization;ion transport;positive regulation of biological process;positive regulation of cell communication;positive regulation of cellular process;positive regulation of response to stimulus;positive regulation of signal transduction;positive regulation of signaling;regulation of biological process;regulation of cell communication;regulation of cellular …	binding;binding, bridging;cation binding;ion binding;ion transmembrane transporter activity;metal ion binding;protein binding;protein binding, bridging;SH3/SH2 adaptor activity;signaling adaptor activity;substrate-specific transmembrane transporter activity;substrate-specific transporter activity;transition metal ion binding;transmembrane transporter activity;transporter activity;zinc ion binding	adherens junction;anchoring junction;cell cortex part;cell junction;cell part;cell-substrate adherens junction;cell-substrate junction;cortical actin cytoskeleton;cortical cytoskeleton;cytoplasmic part;cytoskeletal part;cytoskeleton;extracellular membrane-bounded organelle;extracellular organelle;extracellular region part;extracellular vesicular exosome;focal adhesion;intracellular non-membrane-b…		LASP1	ENSG00000002834	ENSP00000325240;ENSP00000391897;ENSP00000392853;ENSP00000401048;ENSP00000414803;ENSP00000462564;ENSP00000468664	B4DGQ0;C9J9W2;F6S2S5;J3KSN1;K7ESD6;Q14847;Q96ED2;Q96IG0	LASP1	LIM and SH3 domain protein 1
0.392926	0.312415	0.335341	0.401394	0.587559	0.293742	0.0243123	0.328208	-0.118999	0.590509	0.090353	-0.0856776	0.26875	0.586498	0.0985942	0.264958	0.335483	0.317274	cellular component organization;cellular component organization at cellular level;cellular component organization or biogenesis;cellular component organization or biogenesis at cellular level;cellular membrane organization;cellular process;endocytosis;establishment of localization;establishment of localization in cell;establishment of protein localization;intracellular protein transport;intracell…	binding;lipid binding;phosphatidylinositol binding;phospholipid binding	cell part;cytoplasmic part;endosome;extrinsic to membrane;intracellular membrane-bounded organelle;intracellular organelle;intracellular part;membrane part;membrane-bounded organelle;organelle		SNX11	ENSG00000002919	ENSP00000352175;ENSP00000377059;ENSP00000396790;ENSP00000462188;ENSP00000463076;ENSP00000463250;ENSP00000463726;ENSP00000463948;ENSP00000464136;ENSP00000464410	B3KRL6;B4DJI7;B4DPY5;D3DTV0;J3KTN6;J3QKV3;J3QLV8;J3QRB9;J3QRW4;Q53YC0;Q9H885;Q9Y5W9	SNX11	Sorting nexin-11
-0.489125	-0.551193	-0.484899	-0.45547	-0.234	0.0601625	-0.49954	-0.632865	-0.377019	-0.917134	-0.241743	0.0212913	-0.447864	-0.697705	-0.522005	-0.451072	-0.295835	0.263654	biological regulation;cellular component organization;cellular component organization or biogenesis;cellular membrane organization;cellular process;cellular response to stimulus;endocytosis;endosome to lysosome transport;endosome transport;establishment of localization;establishment of localization in cell;intracellular transport;lysosomal transport;membrane invagination;membrane organization;rec…	binding;carbohydrate binding;carbohydrate transmembrane transporter activity;hexose transmembrane transporter activity;mannose binding;mannose transmembrane transporter activity;molecular transducer activity;monosaccharide binding;monosaccharide transmembrane transporter activity;receptor activity;signal transducer activity;signaling receptor activity;substrate-specific transmembrane transporter …	cell part;cytoplasmic part;endosome;integral to membrane;integral to plasma membrane;intracellular membrane-bounded organelle;intracellular organelle;intracellular organelle part;intracellular part;intrinsic to membrane;intrinsic to plasma membrane;late endosome;lysosomal membrane;lytic vacuole;membrane;membrane part;membrane-bounded organelle;organelle;organelle membrane;organelle part;perinucle…	Lysosome;Phagosome	M6PR	ENSG00000003056	ENSP00000000412;ENSP00000437595;ENSP00000439070;ENSP00000439968;ENSP00000440488;ENSP00000440962;ENSP00000441030;ENSP00000441040;ENSP00000442100;ENSP00000442983;ENSP00000444684	A8K528;D3DUV5;F5GX30;F5GXE0;F5GXU0;F5H4U1;F5H883;H0YF90;H0YFL0;H0YFY9;H0YGE9;H0YGT2;P20645	M6PR	Cation-dependent mannose-6-phosphate receptor
-0.00580955	-0.420481	0.0116749	0.509787	0.197866	-0.280855	-0.33495	0.0138929	-0.355385	-0.410905	0.296809	-0.0336308	-0.400166	0.314264	0.278726	-0.65114	0.411427	-0.0862877	cell cycle phase;cell cycle process;cellular component organization;cellular component organization at cellular level;cellular component organization or biogenesis;cellular component organization or biogenesis at cellular level;cellular macromolecule metabolic process;cellular metabolic process;cellular process;cellular protein metabolic process;cytokinesis;macromolecule metabolic process;macromo…		cell part;Cul3-RING ubiquitin ligase complex;cullin-RING ubiquitin ligase complex;intracellular part;macromolecular complex;protein complex;ubiquitin ligase complex	Ubiquitin mediated proteolysis	KLHL13	ENSG00000003096	ENSP00000262820;ENSP00000360943;ENSP00000360945;ENSP00000360949;ENSP00000393807;ENSP00000412640;ENSP00000419803;ENSP00000440707;ENSP00000441029;ENSP00000443191;ENSP00000444450	A0A0C4DG99;B3KV78;B3KWM7;B7Z3S9;B7Z5P2;B7Z802;C9JTS9;D3DWH6;Q6P2E3;Q96QI7;Q9P2N7;Q9UDN9	KLHL13	Kelch-like protein 13
-0.821564	-0.730624	-0.609861	-0.989405	-1.34438	-0.245922	-1.03127	-1.15273	-0.327076	-0.663622	-1.01649	0.0154815	-1.29885	-1.34346	-0.98957	-0.822351	-0.711671	-0.0855134	anatomical structure morphogenesis;appendage morphogenesis;biological regulation;bone morphogenesis;carboxylic acid metabolic process;catabolic process;cell communication;cell cycle phase;cell cycle process;cell death;cell fate determination;cellular catabolic process;cellular developmental process;cellular hormone metabolic process;cellular ketone metabolic process;cellular lipid metabolic proce…	binding;carboxylic acid binding;catalytic activity;cation binding;heme binding;ion binding;iron ion binding;isoprenoid binding;lipid binding;metal ion binding;monocarboxylic acid binding;monooxygenase activity;oxidoreductase activity;oxidoreductase activity, acting on paired donors, with incorporation or reduction of molecular oxygen;retinoic acid 4-hydroxylase activity;retinoic acid binding;reti…	cell part;cytoplasm;cytoplasmic part;endoplasmic reticulum membrane;endoplasmic reticulum part;intracellular organelle part;intracellular part;membrane;membrane part;organelle membrane;organelle part	Retinol metabolism	CYP26B1	ENSG00000003137	ENSP00000001146;ENSP00000401465;ENSP00000430871;ENSP00000430888;ENSP00000443304	B2R8M7;B7Z2K6;B7Z2P4;B7Z3B8;E4W5W7;E5RHM2;E5RHN4;E7ER08;Q32MC0;Q53TW1;Q9NP41;Q9NR63	CYP26B1	Cytochrome P450 26B1
0.687908	1.15211	0.956104	0.434277	2.69744	0.817286	1.18107	0.809388	-0.168299	0.742245	1.22482	0.157053	0.54069	-0.252494	0.11538	1.16292	0.115136	0.46642			cell part;cytoplasm;intracellular part		DBNDD1	ENSG00000003249	ENSP00000002501;ENSP00000306407;ENSP00000376699;ENSP00000456573;ENSP00000457625	B4DQS3;H3BLZ2;H3BS76;Q69YT2;Q9BW25;Q9H9R9	DBNDD1	Dysbindin domain-containing protein 1
-0.618877	-0.817651	-0.24446	-0.543003	-0.366694	-0.228653	-0.515416	-0.356427	-0.369319	-0.448708	-0.117984	-0.473984	-0.466197	-0.562392	-0.245603	-0.544719	-0.0951576	-0.320204		enzyme regulator activity;GTPase regulator activity;guanyl-nucleotide exchange factor activity;nucleoside-triphosphatase regulator activity;Ras guanyl-nucleotide exchange factor activity;Rho guanyl-nucleotide exchange factor activity;small GTPase regulator activity			ALS2	ENSG00000003393	ENSP00000386384;ENSP00000386948;ENSP00000403832	H0Y696;J3KQ33;J3KQ43	ALS2
0.411001	-0.965561	0.811053	0.357109	-0.550491	1.78626	-0.321435	-0.0116422	-1.45343	-0.347953	0.301444	-0.0336308	0.051652	0.149162	0.242043	0.278395	0.733113	-0.141812	activation of caspase activity;apoptosis;biological regulation;cell death;cell surface receptor linked signaling pathway;cellular process;cellular response to stimulus;death;defense response;immune response;immune system process;innate immune response;positive regulation of biological process;positive regulation of caspase activity;positive regulation of catalytic activity;positive regulation of …	binding;catalytic activity;cysteine-type endopeptidase activity;cysteine-type peptidase activity;death effector domain binding;endopeptidase activity;enzyme binding;hydrolase activity;peptidase activity;peptidase activity, acting on L-amino acid peptides;protein binding;protein domain specific binding;ubiquitin protein ligase binding	CD95 death-inducing signaling complex;cell part;cytoplasmic part;cytosol;death-inducing signaling complex;intracellular part;macromolecular complex;membrane part;plasma membrane part;protein complex	Apoptosis;ko05152;RIG-I-like receptor signaling pathway	CASP10	ENSG00000003400	ENSP00000237865;ENSP00000272879;ENSP00000286186;ENSP00000314599;ENSP00000353250;ENSP00000363781;ENSP00000396835;ENSP00000401914	B4E3T5;Q68HC0;Q6KF62;Q6KF63;Q8IUP5;Q8WYQ8;Q92851;Q99845;Q9Y2U6;Q9Y2U7	CASP10	Caspase-10;Caspase-10 subunit p12;Caspase-10 subunit p23/17
0.110789	0.000382423	0.050971	-0.184339	0.030067	0.0349245	0.12979	-0.0385797	-0.0871947	0.187359	0.0158467	-0.0661035	0.135405	-0.432122	0.0465932	-0.106899	0.187416	0.0259039	actin cytoskeleton organization;actin filament-based process;activation of caspase activity;actomyosin structure organization;anatomical structure development;anatomical structure formation involved in morphogenesis;anatomical structure morphogenesis;apoptosis;biological regulation;cell death;cellular component assembly;cellular component assembly at cellular level;cellular component assembly inv…	binding;catalytic activity;cysteine-type endopeptidase activity;cysteine-type peptidase activity;death effector domain binding;endopeptidase activity;enzyme activator activity;enzyme binding;enzyme regulator activity;hydrolase activity;peptidase activity;peptidase activity, acting on L-amino acid peptides;protease binding;protein binding;protein domain specific binding	CD95 death-inducing signaling complex;cell part;cytoplasm;cytoplasmic part;cytosol;death-inducing signaling complex;intracellular part;macromolecular complex;membrane part;membrane raft;plasma membrane part;protein complex	Apoptosis;Chagas disease (American trypanosomiasis)	CFLAR	ENSG00000003402	ENSP00000312455;ENSP00000339326;ENSP00000339335;ENSP00000342809;ENSP00000345807;ENSP00000378580;ENSP00000391029;ENSP00000398551;ENSP00000399420;ENSP00000406775;ENSP00000409570;ENSP00000411535;ENSP00000411897;ENSP00000412882;ENSP00000413270;ENSP00000469608;ENSP00000469917;ENSP00000471749;ENSP00000471805	A0A0A0MR92;B4DJE0;B7Z9F9;C9J408;C9J4Q0;C9JSU3;C9JV51;E9PAP3;F8WBH9;M0QY57;M0QYM0;M0R1A8;O14673;O14674;O14675;O15137;O15138;O15356;O15510;O15519;O43618;O43619;O43620;O60458;O60459;Q53TS6;Q54AF1;Q96TE4;Q9UEW1	CFLAR	CASP8 and FADD-like apoptosis regulator;CASP8 and FADD-like apoptosis regulator subunit p12;CASP8 and FADD-like apoptosis regulator subunit p43
-0.882203	-0.976854	-0.787738	-0.910666	-0.50628	-0.451209	-0.989975	-0.95627	-0.632968	-1.03708	-0.392185	-0.263113	-0.920681	-0.958884	-0.674156	-1.02673	-0.399215	-0.44818	biological regulation;blood coagulation;blood coagulation, extrinsic pathway;coagulation;hemostasis;macromolecule metabolic process;metabolic process;multicellular organismal process;negative regulation of catalytic activity;negative regulation of endopeptidase activity;negative regulation of hydrolase activity;negative regulation of molecular function;negative regulation of peptidase activity;pr…	endopeptidase inhibitor activity;endopeptidase regulator activity;enzyme inhibitor activity;enzyme regulator activity;peptidase inhibitor activity;peptidase regulator activity;serine-type endopeptidase inhibitor activity	anchored to membrane;cell part;cell surface;cytoplasmic part;endoplasmic reticulum;extracellular region;extracellular region part;extracellular space;intracellular membrane-bounded organelle;intracellular organelle;intracellular part;intrinsic to membrane;membrane;membrane part;membrane-bounded organelle;organelle;organelle membrane;organelle part;plasma membrane	Complement and coagulation cascades	TFPI	ENSG00000003436	ENSP00000233156;ENSP00000342306;ENSP00000376172;ENSP00000386344;ENSP00000388159;ENSP00000394185;ENSP00000397248;ENSP00000400179;ENSP00000402954;ENSP00000408170;ENSP00000409177	C9J103;C9JBB3;C9JKV3;C9JP39;C9JQ14;C9JT76;O95103;P10646;Q53TS4	TFPI	Tissue factor pathway inhibitor
-0.158817	0.0159864	-0.120234	-0.0259905	0.061028	-0.261307	0.232127	-0.161538	-0.0181377	-0.362256	0.126302	-0.486867	0.158141	-0.329115	0.0279174	-0.4045	0.0427089	0.185257	cellular component assembly;cellular component assembly at cellular level;cellular component biogenesis;cellular component organization;cellular component organization at cellular level;cellular component organization or biogenesis;cellular component organization or biogenesis at cellular level;cellular macromolecular complex assembly;cellular macromolecular complex subunit organization;cellular …	binding;catalytic activity;enzyme binding;methyltransferase activity;protein binding;transferase activity;transferase activity, transferring one-carbon groups	cell part;cytoplasmic part;extracellular region part;extracellular space;intracellular membrane-bounded organelle;intracellular organelle;intracellular part;membrane-bounded organelle;mitochondrion;organelle		NDUFAF7	ENSG00000003509	ENSP00000002125;ENSP00000337431;ENSP00000394436;ENSP00000399207;ENSP00000402959;ENSP00000410181;ENSP00000412942;ENSP00000416594	B4E0W7;C9J236;C9JEL7;C9JP36;C9JS27;H7C3N5;Q7L592;Q7Z399;Q9P1G3	NDUFAF7	NADH dehydrogenase [ubiquinone] complex I, assembly factor 7
-0.811034	-0.631367	-0.534443	-0.538725	-0.260158	-0.136422	-0.796909	-0.633442	-0.770888	-0.509535	-0.53122	-0.314458	-0.6982	-0.637183	-0.497026	-0.640481	-0.613064	-0.332973	apoptosis;biological regulation;cell death;cellular component assembly;cellular component assembly at cellular level;cellular component organization;cellular component organization at cellular level;cellular component organization or biogenesis;cellular component organization or biogenesis at cellular level;cellular macromolecular complex assembly;cellular macromolecular complex subunit organizat…	binding;cation binding;DNA binding;ion binding;metal ion binding;mRNA binding;nucleic acid binding;nucleotide binding;RNA binding;transition metal ion binding;zinc ion binding	cell part;intracellular membrane-bounded organelle;intracellular organelle;intracellular organelle part;intracellular part;macromolecular complex;membrane-bounded organelle;nuclear part;nucleoplasm;nucleus;organelle;organelle part;ribonucleoprotein complex;spliceosomal complex		RBM5	ENSG00000003756	ENSP00000343054;ENSP00000378603;ENSP00000384872;ENSP00000390711;ENSP00000394622;ENSP00000406119;ENSP00000414218;ENSP00000419534	B2RA45;B4DM16;B4DMF9;B4DZ63;C9J9P7;C9JFQ5;C9JR02;F8W910;F8WE23;H7BYM9;P52756;Q93021;Q9BU14;Q9HDA6;Q9UKY8;Q9UL24	RBM5	RNA-binding protein 5
-1.4496	-1.54159	-0.369519	0.109181	-1.03953	0.00865102	0.527931	-0.0116422	0.23609	0.31101	-1.28975	0.0956521	0.118766	0.0250399	0.197842	0.296184	0.34609	-0.370081	biological regulation;cellular process;cellular response to stimulus;establishment of localization;establishment of protein localization;intracellular signal transduction;metabolic process;protein transport;regulation of biological process;regulation of cellular process;response to stimulus;signal transduction;small GTPase mediated signal transduction;transport;vesicle-mediated transport	binding;catalytic activity;GTP binding;GTPase activity;guanyl nucleotide binding;guanyl ribonucleotide binding;hydrolase activity;hydrolase activity, acting on acid anhydrides;hydrolase activity, acting on acid anhydrides, in phosphorus-containing anhydrides;nucleoside-triphosphatase activity;nucleotide binding;purine nucleotide binding;purine ribonucleoside triphosphate binding;purine ribonucleo…	cell part;cytoplasmic part;extracellular membrane-bounded organelle;extracellular organelle;extracellular region part;extracellular vesicular exosome;Golgi apparatus;intracellular;intracellular membrane-bounded organelle;intracellular organelle;intracellular part;membrane;membrane-bounded organelle;membrane-bounded vesicle;organelle;perinuclear region of cytoplasm;plasma membrane;vesicle		ARF5	ENSG00000004059	ENSP00000000233;ENSP00000412701	C9J1Z8;P26437;P84085	ARF5	ADP-ribosylation factor 5
-0.411268	0.215839	-0.00452232	0.171242	0.0824618	-0.790667	0.154714	-0.0496099	-0.390692	-0.0849183	-0.492407	0.00132513	0.0310159	0.0746706	0.479906	0.361287	0.219642	0.0694511	activation of immune response;activation of innate immune response;biological regulation;cellular process;cellular response to stimulus;defense response;immune response;immune response-activating signal transduction;immune response-regulating signaling pathway;immune system process;innate immune response;innate immune response-activating signal transduction;MyD88-independent toll-like receptor si…		axon;cell junction;cell part;cell projection;cytoplasm;cytoplasmic part;cytoskeletal part;cytosol;dendrite;extrinsic to membrane;extrinsic to mitochondrial outer membrane;extrinsic to organelle membrane;intracellular membrane-bounded organelle;intracellular organelle;intracellular organelle part;intracellular part;macromolecular complex;membrane part;membrane-bounded organelle;microtubule;mitocho…		SARM1	ENSG00000004139	ENSP00000462228;ENSP00000462479;ENSP00000464166;ENSP00000468032	J3KRZ6;J3KSG7;J3QRE0;O60277;Q6SZW1;Q7LGG3;Q9NXY5	SARM1	Sterile alpha and TIR motif-containing protein 1
0.420974	0.357198	0.284411	0.340241	0.185582	0.102339	0.123309	0.178982	0.199743	0.349294	0.301969	0.191007	0.0514102	0.193784	0.299672	0.322112	0.326422	0.323668	anatomical structure morphogenesis;cell part morphogenesis;cellular component morphogenesis;cellular component organization;cellular component organization at cellular level;cellular component organization or biogenesis;cellular component organization or biogenesis at cellular level;cellular developmental process;cellular process;developmental process;mitochondrion morphogenesis;mitochondrion org…	binding;DNA binding;nucleic acid binding	cell part;cytoplasmic part;intracellular membrane-bounded organelle;intracellular non-membrane-bounded organelle;intracellular organelle;intracellular organelle part;intracellular part;membrane-bounded organelle;mitochondrial nucleoid;mitochondrial part;mitochondrion;non-membrane-bounded organelle;nucleoid;nucleus;organelle;organelle part		POLDIP2	ENSG00000004142	ENSP00000475924;ENSP00000477665	A0A087WT81;B2R846;B4DEM9;Q96JE4;Q9Y2S7	POLDIP2	Polymerase delta-interacting protein 2
0.193082	0.0992064	-0.990401	-0.202319	0.581959	-0.335997	-0.381871	0.533792	-0.0396178	0.0261133	-0.560077	0.253532	-0.129769	0.0137951	-0.152655	-0.0480266	0.990073	0.287031	anatomical structure formation involved in morphogenesis;anatomical structure morphogenesis;angiogenesis;axon guidance;biological regulation;branching morphogenesis of a tube;cell migration;cell motility;cell surface receptor linked signaling pathway;cellular component assembly;cellular component assembly at cellular level;cellular component movement;cellular component organization;cellular compo…	binding;molecular transducer activity;protein binding;protein domain specific binding;receptor activity;semaphorin receptor activity;signal transducer activity;signaling receptor activity;transmembrane signaling receptor activity	cell part;cell projection;integral to membrane;integral to plasma membrane;intracellular;intrinsic to membrane;intrinsic to plasma membrane;lamellipodium;membrane;membrane part;plasma membrane;plasma membrane part		PLXND1	ENSG00000004399	ENSP00000317128;ENSP00000423832;ENSP00000426162;ENSP00000426241;ENSP00000426540;ENSP00000427696	A7E2C6;C9JPZ6;D6RH25;H0Y9D1;H0YA64;H0YAB2;H0YAM9;Q6PJS9;Q8IZJ2;Q9BTQ2;Q9Y4D7	PLXND1	Plexin-D1
0.299075	0.202506	0.157722	0.0969305	0.170353	0.152421	0.302024	0.266321	0.406403	0.294409	0.200357	0.0770564	0.169899	0.167238	0.250062	0.0892696	0.455434	0.145565	2'-deoxyribonucleotide metabolic process;ADP biosynthetic process;ADP metabolic process;AMP metabolic process;anatomical structure development;ATP metabolic process;biosynthetic process;brain development;cellular biosynthetic process;cellular metabolic process;cellular nitrogen compound biosynthetic process;cellular nitrogen compound metabolic process;cellular process;dATP metabolic process;deoxy…	adenyl nucleotide binding;adenyl ribonucleotide binding;adenylate kinase activity;ATP binding;binding;catalytic activity;kinase activity;nucleobase-containing compound kinase activity;nucleotide binding;nucleotide kinase activity;phosphotransferase activity, phosphate group as acceptor;purine nucleotide binding;purine ribonucleoside triphosphate binding;purine ribonucleotide binding;ribonucleotid…	cell part;cytoplasmic part;cytosol;extracellular membrane-bounded organelle;extracellular organelle;extracellular region part;extracellular vesicular exosome;intracellular organelle part;intracellular part;membrane;membrane-bounded organelle;membrane-bounded vesicle;membrane-enclosed lumen;mitochondrial inner membrane;mitochondrial intermembrane space;mitochondrial membrane;mitochondrial part;org…	Purine metabolism	AK2	ENSG00000004455	ENSP00000346921;ENSP00000362548;ENSP00000446849;ENSP00000447082;ENSP00000449003;ENSP00000450008;ENSP00000450109;ENSP00000486342;ENSP00000486507	A8K6L1;B4DHH7;B4DL64;F8VPP1;F8VY04;F8VZG5;F8W1A4;G3V213;P54819;Q16856;Q5EB54;Q5TIF7;Q8TCY2;Q8TCY3	AK2	Adenylate kinase 2, mitochondrial;Adenylate kinase 2, mitochondrial, N-terminally processed
0.290242	0.36169	0.12919	0.376716	0.330555	0.402146	0.185655	0.12722	0.537189	0.198776	0.155776	0.186432	0.244297	0.151995	0.155153	0.469601	0.461895	0.252625	anatomical structure development;androgen receptor signaling pathway;biological regulation;cation transport;cellular component assembly;cellular component assembly at cellular level;cellular component organization;cellular component organization at cellular level;cellular component organization or biogenesis;cellular component organization or biogenesis at cellular level;cellular macromolecular c…	adenyl nucleotide binding;adenyl ribonucleotide binding;ATP binding;binding;binding, bridging;catalytic activity;cis-trans isomerase activity;drug binding;FK506 binding;GTP binding;guanyl nucleotide binding;guanyl ribonucleotide binding;heat shock protein binding;isomerase activity;macrolide binding;nucleotide binding;peptidyl-prolyl cis-trans isomerase activity;protein binding;protein binding, b…	axon part;axonal growth cone;cell body;cell part;cell projection part;cytoplasm;cytoplasmic part;cytoskeletal part;cytosol;endoplasmic reticulum membrane;endoplasmic reticulum part;extracellular membrane-bounded organelle;extracellular organelle;extracellular region part;extracellular vesicular exosome;growth cone;intracellular membrane-bounded organelle;intracellular organelle;intracellular orga…		FKBP4	ENSG00000004478	ENSP00000001008;ENSP00000438491;ENSP00000439703;ENSP00000442193;ENSP00000446368;ENSP00000486800	D3DUQ1;F5H120;F5H1U3;H0YFG2;H0YG86;Q02790;Q9UCP1;Q9UCV7	FKBP4	Peptidyl-prolyl cis-trans isomerase;Peptidyl-prolyl cis-trans isomerase FKBP4;Peptidyl-prolyl cis-trans isomerase FKBP4, N-terminally processed
0.292621	0.0333185	0.0394077	0.192285	0.302537	-0.26127	-0.327768	-0.314341	0.0245531	-0.633661	-0.124456	0.064239	-0.10468	0.157402	-0.336186	-0.126624	-0.0476074	0.0550339	anatomical structure development;biological regulation;biosynthetic process;blood coagulation;cell development;cell differentiation;cell proliferation;cellular biosynthetic process;cellular component organization;cellular component organization at cellular level;cellular component organization or biogenesis;cellular component organization or biogenesis at cellular level;cellular developmental pro…	androgen receptor binding;bHLH transcription factor binding;binding;catalytic activity;chromatin binding;coenzyme binding;cofactor binding;demethylase activity;DNA binding;enzyme binding;flavin adenine dinucleotide binding;histone demethylase activity;histone demethylase activity (H3-dimethyl-K4 specific);histone demethylase activity (H3-K4 specific);histone demethylase activity (H3-K9 specific);…	cell part;chromatin;chromosomal part;intracellular membrane-bounded organelle;intracellular organelle;intracellular organelle part;intracellular part;macromolecular complex;membrane-bounded organelle;nuclear chromatin;nuclear chromosome part;nuclear part;nucleoplasm;nucleoplasm part;nucleus;organelle;organelle part;protein complex;transcription factor complex		KDM1A	ENSG00000004487	ENSP00000349049;ENSP00000383042;ENSP00000473294;ENSP00000473297	A8MWP9;O60341;Q5TH94;Q5TH95;Q86VT7;Q8IXK4;Q8NDP6;Q8TAZ3;Q96AW4;R4GMP9;R4GMQ1	KDM1A	Lysine-specific histone demethylase 1A
0.0657494	-0.146793	-0.0885229	0.0389738	-0.167751	-0.111118	-0.464409	-0.221565	-0.0531247	-0.627638	-0.243572	-0.120421	-0.201215	-0.116852	-0.142767	0.0331497	-0.483984	-0.297931	cellular macromolecule metabolic process;cellular metabolic process;cellular nitrogen compound metabolic process;cellular process;macromolecule metabolic process;metabolic process;nitrogen compound metabolic process;nucleic acid metabolic process;nucleobase-containing compound metabolic process;primary metabolic process;RNA metabolic process;RNA processing	binding;DNA binding;nucleic acid binding;nucleotide binding;RNA binding	cell part;intracellular membrane-bounded organelle;intracellular organelle;intracellular part;membrane-bounded organelle;nucleus;organelle		RBM6	ENSG00000004534	ENSP00000266022;ENSP00000389763;ENSP00000392475;ENSP00000392939;ENSP00000393530;ENSP00000394336;ENSP00000396410;ENSP00000396466;ENSP00000399942;ENSP00000403865;ENSP00000406548;ENSP00000408665	B4E0G6;C9J250;C9JII0;C9JMC8;C9JSL1;E9PGM9;F8WCA5;F8WCT0;F8WF63;O60549;O75524;P78332;Q86SS3	RBM6	RNA-binding protein 6
-0.209162	-0.350768	0.235464	-0.477382	-0.400595	0.03543	-0.470934	-0.253664	-0.491455	-0.533973	-0.209315	-0.0508761	-0.529152	-0.184067	-0.267907	-0.376547	-0.184424	0.422559	cell communication;cell-cell signaling;cellular process;signaling;synaptic transmission	adenyl nucleotide binding;adenyl ribonucleotide binding;ATP binding;binding;calmodulin-dependent protein kinase activity;catalytic activity;kinase activity;nucleotide binding;phosphotransferase activity, alcohol group as acceptor;protein kinase activity;protein serine/threonine kinase activity;purine nucleotide binding;purine ribonucleoside triphosphate binding;purine ribonucleotide binding;ribon…	cell part;cytoplasmic part;cytosol;intracellular membrane-bounded organelle;intracellular organelle;intracellular part;membrane-bounded organelle;nucleus;organelle	Adipocytokine signaling pathway	CAMKK1	ENSG00000004660	ENSP00000158166;ENSP00000323118;ENSP00000371188	J3KPJ3;Q8N5S9;Q9BQH3	CAMKK1	Calcium/calmodulin-dependent protein kinase kinase 1
-0.132137	-0.48689	0.0529594	-0.336106	-0.0561099	0.046073	-0.040796	-0.245168	-0.347033	-0.682913	-0.0620456	-0.176678	0.0715108	-0.0602124	-0.0858445	-0.385	-0.611846	-0.676265	biosynthetic process;cellular biosynthetic process;cellular macromolecule biosynthetic process;cellular macromolecule metabolic process;cellular metabolic process;cellular nitrogen compound metabolic process;cellular process;cellular response to stimulus;cellular response to stress;DNA conformation change;DNA duplex unwinding;DNA geometric change;DNA metabolic process;DNA recombination;DNA repair…	3'-5' DNA helicase activity;adenyl nucleotide binding;adenyl ribonucleotide binding;ATP binding;ATPase activity;ATPase activity, coupled;ATP-dependent 3'-5' DNA helicase activity;ATP-dependent DNA helicase activity;ATP-dependent helicase activity;binding;catalytic activity;DNA binding;DNA helicase activity;DNA-dependent ATPase activity;helicase activity;hydrolase activity;hydrolase activity, acti…	cell part;intracellular membrane-bounded organelle;intracellular organelle;intracellular organelle part;intracellular part;membrane;membrane-bounded organelle;nuclear part;nucleoplasm;nucleus;organelle;organelle part		RECQL	ENSG00000004700	ENSP00000318727;ENSP00000379400;ENSP00000395449;ENSP00000416739;ENSP00000439069;ENSP00000440700;ENSP00000445555;ENSP00000446036	A8K6G2;F5GYB7;F5H2L2;F5H3W0;F5H4P4;F8WA66;F8WD97;P46063	RECQL	ATP-dependent DNA helicase Q1
-0.0207527	-0.00924206	-0.125481	-0.212087	-0.0298786	0.111425	0.196832	-0.153661	0.208972	-0.772395	0.00651741	0.0891094	-0.399009	-0.243156	-0.0721116	-0.120283	-0.0344834	-0.16766			cell part;extracellular membrane-bounded organelle;extracellular organelle;extracellular region part;extracellular vesicular exosome;membrane;membrane-bounded organelle;membrane-bounded vesicle;organelle;vesicle		VPS50	ENSG00000004766	ENSP00000251739;ENSP00000307666;ENSP00000390584;ENSP00000395433;ENSP00000405553;ENSP00000406787;ENSP00000414450;ENSP00000415809;ENSP00000443104	B3KX22;C9JA29;D1MQ00;F2Z3F0;F5H5U7;F8WDT1;H0Y7Q2;H7BZP1;Q75N07;Q8WVK3;Q96JG6;Q9H5C6	CCDC132	Coiled-coil domain-containing protein 132
0.439147	0.525242	0.500438	0.435213	0.645722	0.421361	0.393162	0.985105	0.464918	0.906938	0.172081	0.524248	0.934969	0.64103	0.372746	0.573325	1.10246	1.23478	biological regulation;regulation of biological process;regulation of multicellular organismal process;regulation of muscle contraction;regulation of muscle system process;regulation of system process	binding;identical protein binding;protein binding;protein dimerization activity;protein homodimerization activity;structural constituent of eye lens;structural molecule activity	cell part;cytoplasm;intracellular membrane-bounded organelle;intracellular organelle;intracellular part;membrane-bounded organelle;nucleus;organelle		HSPB6	ENSG00000004776	ENSP00000004982;ENSP00000467169;ENSP00000468057	K7EP04;O14551;O14558;Q6NVI3;Q96MG9	HSPB6	Heat shock protein beta-6
-1.60714	-0.155078	-0.636406	-0.892468	-0.42387	0.0400152	-0.386108	0.0972922	-0.876119	0.0037396	-0.601148	0.200834	0.0224853	0.131955	-0.882286	-0.232016	-0.41575	0.378662	biological regulation;cellular process;cellular response to stimulus;establishment of localization;establishment of protein localization;intracellular signal transduction;protein transport;regulation of biological process;regulation of cellular process;regulation of response to stimulus;regulation of signal transduction;regulation of signaling;regulation of small GTPase mediated signal transducti…	binding;enzyme activator activity;enzyme regulator activity;GTPase activator activity;GTPase regulator activity;lipid binding;nucleoside-triphosphatase regulator activity;phosphatidylinositol binding;phospholipid binding	cell part;cytoplasmic part;cytosol;intracellular;intracellular part;membrane;plasma membrane		ARHGAP33	ENSG00000004777	ENSP00000007510;ENSP00000320038;ENSP00000368227;ENSP00000465411;ENSP00000466443;ENSP00000467844	A0A0A0MQQ9;K7EK14;K7EMC2;K7EQI6;O14552;O14559;O14560;Q6ZSP6;Q96CP3;Q9NT23	ARHGAP33	Rho GTPase-activating protein 33
0.472785	0.177509	0.217815	0.396163	0.163161	-0.0458164	0.446972	0.257883	0.42082	0.386163	0.3806	0.211609	0.105259	0.219513	0.37304	0.326121	0.237445	0.143883	biosynthetic process;carboxylic acid biosynthetic process;carboxylic acid metabolic process;cellular biosynthetic process;cellular ketone metabolic process;cellular lipid metabolic process;cellular macromolecule metabolic process;cellular metabolic process;cellular process;cellular protein metabolic process;electron transport chain;fatty acid biosynthetic process;fatty acid metabolic process;gene…	acyl carrier activity;binding;calcium ion binding;carboxylic acid binding;catalytic activity;cation binding;fatty acid binding;ion binding;lipid binding;metal ion binding;monocarboxylic acid binding;NADH dehydrogenase (quinone) activity;NADH dehydrogenase (ubiquinone) activity;NADH dehydrogenase activity;oxidoreductase activity;oxidoreductase activity, acting on NADH or NADPH;oxidoreductase activ…	cell part;cytoplasmic part;intracellular organelle lumen;intracellular organelle part;intracellular part;macromolecular complex;membrane;membrane part;membrane-enclosed lumen;mitochondrial inner membrane;mitochondrial matrix;mitochondrial membrane;mitochondrial membrane part;mitochondrial part;mitochondrial respiratory chain complex I;NADH dehydrogenase complex;organelle inner membrane;organelle …	Alzheimer's disease;Huntington's disease;Oxidative phosphorylation;Parkinson's disease	NDUFAB1	ENSG00000004779	ENSP00000007516;ENSP00000454812;ENSP00000454891;ENSP00000458770;ENSP00000461693	B2R4M1;H3BNE8;H3BNK3;I3L505;O14561;Q9UNV1	NDUFAB1	Acyl carrier protein;Acyl carrier protein, mitochondrial
1.30529	-0.319198	0.355373	-0.620171	-0.524956	-0.798704	-0.184955	0.189992	-0.068764	0.293594	-2.3195	0.0081892	-0.0187373	-0.805035	0.61288	-0.0908394	0.0786102	0.346126		binding;cation binding;ion binding;metal ion binding	cell part;centriolar satellite;cytoplasm;cytoplasmic part;cytoskeletal part;intracellular organelle part;intracellular part;microtubule organizing center part;organelle part		ZMYND10	ENSG00000004838	ENSP00000231749;ENSP00000353289;ENSP00000391545;ENSP00000393687;ENSP00000415661	A6NK41;B3KU54;C9JUQ8;F2Z3M9;O14570;O75800;O75801;Q53FE6;Q8N4R6;Q8NDN6	ZMYND10	Zinc finger MYND domain-containing protein 10
0.0607007	-0.0573807	0.0696945	0.108981	0.159444	-0.0260372	-0.0878389	-0.109855	0.197701	0.0231054	0.100994	0.0435729	-0.0206542	0.0606639	-0.0959334	0.0556755	0.127797	-0.0947454	acidic amino acid transport;alcohol biosynthetic process;alcohol metabolic process;amine transport;amino acid transport;anion transport;aspartate transport;ATP biosynthetic process;ATP metabolic process;biosynthetic process;carbohydrate biosynthetic process;carbohydrate metabolic process;carboxylic acid transport;cellular biosynthetic process;cellular carbohydrate biosynthetic process;cellular ca…	acidic amino acid transmembrane transporter activity;active transmembrane transporter activity;amine transmembrane transporter activity;amino acid transmembrane transporter activity;binding;calcium ion binding;carboxylic acid transmembrane transporter activity;cation binding;ion binding;L-amino acid transmembrane transporter activity;L-aspartate transmembrane transporter activity;L-glutamate tran…	cell part;cytoplasmic part;integral to membrane;integral to plasma membrane;intracellular membrane-bounded organelle;intracellular organelle;intracellular organelle part;intracellular part;intrinsic to membrane;intrinsic to plasma membrane;membrane;membrane part;membrane-bounded organelle;mitochondrial inner membrane;mitochondrial membrane;mitochondrial part;mitochondrion;organelle;organelle inne…		SLC25A13	ENSG00000004864	ENSP00000265631;ENSP00000400101;ENSP00000473505	O14566;O14575;Q546F9;Q9NZW1;Q9UJS0;Q9UNI7;R4GN64	SLC25A13	Calcium-binding mitochondrial carrier protein Aralar2
-0.699574	-0.848383	-0.617991	-0.592586	-0.245979	0.068294	-0.519375	-0.445296	-0.431334	-0.616442	-0.114664	-0.0132823	-1.14273	-0.769536	-0.506419	-0.135429	-0.157203	-0.364299			cell part;integral to membrane;intrinsic to membrane;membrane part		ST7	ENSG00000004866	ENSP00000265437;ENSP00000325673;ENSP00000377089;ENSP00000377090;ENSP00000377092;ENSP00000377093;ENSP00000377095;ENSP00000377097;ENSP00000388698;ENSP00000390830;ENSP00000391444;ENSP00000392876;ENSP00000393040;ENSP00000402934;ENSP00000411118;ENSP00000413601;ENSP00000414031;ENSP00000416858;ENSP00000419516;ENSP00000419715;ENSP00000420052	A4D0V2;B7Z4L1;B7Z4U3;C9J2Z1;C9JCI7;C9JRQ0;C9JRW1;C9JU30;C9JWK8;C9JX79;C9JZV9;E7EMS3;E7ENZ9;E7EPD9;E7EPW5;E9PCV1;E9PF01;G3XAH9;H7BXS2;Q5CZ72;Q7LE31;Q7LE32;Q8NA32;Q8NEJ8;Q8TDI9;Q9BWX3;Q9BWX4;Q9NRC1;Q9NRC2;Q9NXZ7	ST7	Suppressor of tumorigenicity 7 protein
-0.108138	-0.265236	-0.0468798	-0.182051	0.198095	0.273198	-0.0535524	-0.0398729	-0.0551684	-0.221439	0.215841	0.163291	0.123373	0.017411	0.0743585	0.0583229	0.0518484	-0.233578	anaphase-promoting complex-dependent proteasomal ubiquitin-dependent protein catabolic process;biological regulation;catabolic process;cell cycle;cell cycle checkpoint;cell cycle process;cell division;cell proliferation;cellular catabolic process;cellular macromolecule catabolic process;cellular macromolecule metabolic process;cellular metabolic process;cellular process;cellular protein metabolic…	binding;enzyme binding;phosphatase binding;protein binding;protein phosphatase binding	anaphase-promoting complex;cell part;centrosome;cullin-RING ubiquitin ligase complex;cytoplasm;cytoplasmic part;cytoskeletal part;cytosol;intracellular membrane-bounded organelle;intracellular non-membrane-bounded organelle;intracellular organelle;intracellular organelle part;intracellular part;macromolecular complex;membrane-bounded organelle;microtubule organizing center;non-membrane-bounded or…	Cell cycle;Cell cycle - yeast;Meiosis - yeast;Oocyte meiosis;Progesterone-mediated oocyte maturation;Ubiquitin mediated proteolysis	CDC27	ENSG00000004897	ENSP00000066544;ENSP00000432105;ENSP00000432211;ENSP00000434614;ENSP00000437339;ENSP00000458904;ENSP00000459307;ENSP00000460061;ENSP00000460132;ENSP00000460279;ENSP00000460424;ENSP00000460454;ENSP00000460830;ENSP00000466424	E9PRZ6;F6QPS0;G3V1C4;G5EA36;I3L1K3;I3L225;I3L2Z8;I3L328;I3L394;I3L3G1;I3L3H6;I3L3Y5;K7EMA6;P30260;Q16349;Q96F35	CDC27	Cell division cycle protein 27 homolog
0.537365	0.240121	0.196068	0.199986	0.108752	0.0582676	0.26664	0.106241	0.27574	0.0832222	0.43094	0.0185151	0.202031	0.171436	0.223272	0.4179	0.247051	0.217203	anatomical structure morphogenesis;developmental process;metabolic process;organ morphogenesis;oxidation-reduction process	binding;carbon-sulfur lyase activity;catalytic activity;cation binding;holocytochrome-c synthase activity;ion binding;lyase activity;metal ion binding	cell part;cytoplasmic part;intracellular membrane-bounded organelle;intracellular organelle;intracellular organelle part;intracellular part;membrane;membrane-bounded organelle;mitochondrial inner membrane;mitochondrial membrane;mitochondrial part;mitochondrion;organelle;organelle inner membrane;organelle membrane;organelle part	Porphyrin and chlorophyll metabolism	HCCS	ENSG00000004961	ENSP00000326579;ENSP00000370139;ENSP00000370140	B3KUS1;P53701;Q502X8	HCCS	Cytochrome c-type heme lyase
-0.100378	-0.0166349	0.171033	0.0601397	0.115194	-0.184742	0.168681	0.162271	0.495004	0.311924	0.097198	-0.153841	-0.0956445	-0.0711586	-0.134266	-0.063056	0.136819	0.394602	anatomical structure development;anatomical structure formation involved in morphogenesis;anatomical structure morphogenesis;biological regulation;biosynthetic process;canonical Wnt receptor signaling pathway;canonical Wnt receptor signaling pathway involved in regulation of cell proliferation;cell surface receptor linked signaling pathway;cellular biosynthetic process;cellular localization;cellu…	binding;frizzled binding;G-protein-coupled receptor binding;identical protein binding;protein binding;receptor binding	apical part of cell;cell part;clathrin-coated endocytic vesicle;clathrin-coated vesicle;coated vesicle;cytoplasm;cytoplasmic membrane-bounded vesicle;cytoplasmic part;cytoplasmic vesicle;cytosol;endocytic vesicle;intracellular membrane-bounded organelle;intracellular organelle;intracellular part;membrane;membrane-bounded organelle;membrane-bounded vesicle;nucleus;organelle;plasma membrane;vesicle	Basal cell carcinoma;Melanogenesis;Notch signaling pathway;Pathways in cancer;Wnt signaling pathway	DVL2	ENSG00000004975	ENSP00000005340;ENSP00000458209;ENSP00000458465;ENSP00000459797;ENSP00000459991	D3DTN3;I3L0M7;I3L0Z8;I3L2N2;I3L2W9;O14641;Q53XM0	DVL2	Segment polarity protein dishevelled homolog DVL-2
-0.116821	0.0101099	-0.00233841	-0.101727	-0.0395284	0.0220528	-0.191245	-0.188176	-0.163666	0.00674415	-0.206729	0.0359654	-0.0833459	-0.152958	-0.0343308	-0.232483	-0.295223	0.00270581	biological regulation;biosynthetic process;catabolic process;cellular biosynthetic process;cellular catabolic process;cellular macromolecule biosynthetic process;cellular macromolecule catabolic process;cellular macromolecule metabolic process;cellular metabolic process;cellular nitrogen compound metabolic process;cellular process;cellular response to stimulus;cellular response to stress;DNA meta…	adenyl nucleotide binding;adenyl ribonucleotide binding;ATP binding;ATPase activity;ATPase activity, coupled;ATP-dependent helicase activity;ATP-dependent RNA helicase activity;binding;catalytic activity;cation binding;chromatin binding;DNA binding;helicase activity;hydrolase activity;hydrolase activity, acting on acid anhydrides;hydrolase activity, acting on acid anhydrides, in phosphorus-contai…	cell part;chromatin;chromosomal part;cytoplasm;cytoplasmic mRNA processing body;cytoplasmic part;cytosol;exon-exon junction complex;intracellular membrane-bounded organelle;intracellular non-membrane-bounded organelle;intracellular organelle;intracellular organelle part;intracellular part;macromolecular complex;membrane-bounded organelle;non-membrane-bounded organelle;nuclear part;nucleoplasm;nuc…	mRNA surveillance pathway;RNA transport	UPF1	ENSG00000005007	ENSP00000262803;ENSP00000470142	O00239;O43343;Q86Z25;Q92842;Q92900	UPF1	Regulator of nonsense transcripts 1
0.208272	-0.183434	0.100376	0.2182	-0.0413518	0.167276	0.283957	-0.227959	0.0837581	0.257086	-0.0874009	-0.169132	-0.0611997	0.00563312	0.241021	0.0830832	0.0495005	-0.430622	B cell activation;biological regulation;cell activation;cellular component assembly;cellular component organization;cellular component organization or biogenesis;cellular process;cellular response to stimulus;immune system process;leukocyte activation;lymphocyte activation;macromolecular complex assembly;macromolecular complex subunit organization;negative regulation of biological process;negativ…	binding;binding, bridging;protein binding;protein binding, bridging;SH3/SH2 adaptor activity;signaling adaptor activity	cell part;cytoplasm;cytoplasmic part;cytosol;intracellular organelle part;intracellular part;membrane;nuclear part;nucleoplasm;organelle part;plasma membrane		SKAP2	ENSG00000005020	ENSP00000005587;ENSP00000408163	A4D173;C9JQ17;O75563;Q53GP6;Q75MK6;Q75MZ4;Q9UBZ3;Q9UED8	SKAP2	Src kinase-associated phosphoprotein 2
0.369701	0.153365	0.00453854	0.216648	0.103368	-0.156487	0.17366	0.159204	0.285318	-0.015135	0.254661	0.106589	0.0157514	0.169302	0.0936532	0.208838	0.323327	0.204992	adenine transport;biological regulation;cellular metabolic process;cellular process;chromosome segregation;energy derivation by oxidation of organic compounds;energy reserve metabolic process;establishment of localization;generation of precursor metabolites and energy;metabolic process;nitrogen compound transport;nucleobase transport;nucleobase-containing compound transport;oxidation-reduction pr…	adenine transmembrane transporter activity;binding;enzyme binding;nucleobase transmembrane transporter activity;nucleobase-containing compound transmembrane transporter activity;protein binding;purine base transmembrane transporter activity;substrate-specific transmembrane transporter activity;substrate-specific transporter activity;transmembrane transporter activity;transporter activity;ubiquiti…	cell part;cytoplasmic part;cytoskeletal part;extracellular membrane-bounded organelle;extracellular organelle;extracellular region part;extracellular vesicular exosome;integral to membrane;integral to plasma membrane;intracellular membrane-bounded organelle;intracellular non-membrane-bounded organelle;intracellular organelle;intracellular organelle part;intracellular part;intrinsic to membrane;in…	Calcium signaling pathway;Huntington's disease;Parkinson's disease	SLC25A5	ENSG00000005022	ENSP00000360671	B2RCV1;O43350;P05141	SLC25A5	ADP/ATP translocase 2;ADP/ATP translocase 2, N-terminally processed
0.590036	0.127754	0.356052	0.446609	0.271512	0.203679	0.166138	0.278644	0.291874	0.215095	0.238273	-0.0595908	0.124964	0.329391	0.355175	0.312473	0.245753	-0.00163627	biological regulation;calcium ion homeostasis;calcium ion transport;cation homeostasis;cation transport;cellular calcium ion homeostasis;cellular cation homeostasis;cellular chemical homeostasis;cellular divalent inorganic cation homeostasis;cellular homeostasis;cellular ion homeostasis;cellular metal ion homeostasis;cellular process;chemical homeostasis;divalent inorganic cation homeostasis;diva…	calcium channel inhibitor activity;calcium channel regulator activity;channel inhibitor activity;channel regulator activity;ion channel inhibitor activity	calcium channel complex;cation channel complex;cell part;cytoplasmic part;integral to membrane;integral to mitochondrial inner membrane;integral to mitochondrial membrane;integral to organelle membrane;intracellular membrane-bounded organelle;intracellular organelle;intracellular organelle part;intracellular part;intrinsic to membrane;intrinsic to mitochondrial inner membrane;intrinsic to organel…		MCUB	ENSG00000005059	ENSP00000378145	A8K4Y3;Q6IAC1;Q9NWR8	CCDC109B	Calcium uniporter regulatory subunit MCUb, mitochondrial
0.334541	0.133371	0.237031	0.423344	0.261846	0.261679	0.180681	0.543609	0.261636	0.421674	0.348164	0.294677	0.252465	0.349128	0.348421	0.477729	0.523444	0.274174	biological regulation;biosynthetic process;cellular biosynthetic process;cellular macromolecule biosynthetic process;cellular macromolecule metabolic process;cellular metabolic process;cellular nitrogen compound metabolic process;cellular process;cellular response to stimulus;cellular response to stress;developmental process;DNA metabolic process;DNA repair;gene expression;macromolecule biosynthe…	binding;catalytic activity;DNA binding;DNA-directed RNA polymerase activity;LRR domain binding;nucleic acid binding;nucleotidyltransferase activity;protein binding;protein domain specific binding;RNA polymerase activity;transferase activity;transferase activity, transferring phosphorus-containing groups	cell part;DNA-directed RNA polymerase complex;DNA-directed RNA polymerase II, core complex;intracellular membrane-bounded organelle;intracellular organelle;intracellular organelle part;intracellular part;macromolecular complex;membrane-bounded organelle;nuclear DNA-directed RNA polymerase complex;nuclear part;nucleoplasm;nucleoplasm part;nucleus;organelle;organelle part;protein complex;RNA polyme…	Huntington's disease;Purine metabolism;Pyrimidine metabolism;RNA polymerase	POLR2J	ENSG00000005075	ENSP00000292614;ENSP00000377383	A5D6V8;F6S314;O43375;P52435	POLR2J	DNA-directed RNA polymerase II subunit RPB11-a
-0.0874116	-0.00623798	0.0125256	-0.0352087	0.0941501	0.116407	0.177541	0.0223048	-0.143884	-0.0600007	-0.0991302	-0.0875907	0.0135636	0.0364807	-0.183705	-0.0499315	-0.0996027	0.0357525	biological regulation;cellular macromolecule metabolic process;cellular metabolic process;cellular nitrogen compound metabolic process;cellular process;macromolecule metabolic process;metabolic process;nitrogen compound metabolic process;nucleic acid metabolic process;nucleobase-containing compound metabolic process;positive regulation of biological process;positive regulation of biosynthetic pro…	adenyl nucleotide binding;adenyl ribonucleotide binding;ATP binding;ATPase activity;ATPase activity, coupled;ATP-dependent helicase activity;ATP-dependent RNA helicase activity;binding;catalytic activity;DNA binding;helicase activity;hydrolase activity;hydrolase activity, acting on acid anhydrides;hydrolase activity, acting on acid anhydrides, in phosphorus-containing anhydrides;nucleic acid bind…	cell part;cytoplasm;intracellular non-membrane-bounded organelle;intracellular organelle;intracellular organelle part;intracellular part;non-membrane-bounded organelle;nuclear part;nucleolus;nucleoplasm;organelle;organelle part		DHX33	ENSG00000005100	ENSP00000225296;ENSP00000413779;ENSP00000458203;ENSP00000458925	B4DHF9;I3L0M5;I3L1L6;Q05BE5;Q4G149;Q5CZ73;Q9H5M9;Q9H6R0	DHX33	Putative ATP-dependent RNA helicase DHX33
-0.164194	0.0287256	-0.352446	0.875524	-1.62449	1.13418	-0.0832756	-0.852945	-0.068764	-1.23692	-0.920228	-0.576773	-1.34067	-0.674974	-0.779437	-0.300293	-1.04241	-1.50133	anatomical structure formation involved in morphogenesis;angiogenesis;cell differentiation;cellular developmental process;cellular process;developmental process		cell part;extracellular membrane-bounded organelle;extracellular organelle;extracellular region part;extracellular vesicular exosome;integral to membrane;intrinsic to membrane;membrane;membrane part;membrane-bounded organelle;membrane-bounded vesicle;organelle;plasma membrane;vesicle		THSD7A	ENSG00000005108	ENSP00000406482;ENSP00000481440	A0A087WY08;Q9UPZ6	THSD7A	Thrombospondin type-1 domain-containing protein 7A
0.0707133	0.111437	-0.150027	-0.149721	0.0207067	-0.292274	-0.0041635	-0.182575	-0.12744	-0.138248	0.16925	-0.193975	0.164817	-0.273653	0.00416899	-0.133484	0.012085	-0.132469	base-excision repair;base-excision repair, DNA ligation;biological regulation;biosynthetic process;cell cycle;cell division;cellular biosynthetic process;cellular component organization;cellular component organization at cellular level;cellular component organization or biogenesis;cellular component organization or biogenesis at cellular level;cellular macromolecule biosynthetic process;cellular …	adenyl nucleotide binding;adenyl ribonucleotide binding;ATP binding;binding;catalytic activity;cation binding;DNA binding;DNA ligase (ATP) activity;DNA ligase activity;ion binding;ligase activity;ligase activity, forming phosphoric ester bonds;metal ion binding;nucleic acid binding;nucleotide binding;purine nucleotide binding;purine ribonucleoside triphosphate binding;purine ribonucleotide bindin…	cell part;chromosomal part;cytoplasmic part;DNA ligase III-XRCC1 complex;intracellular membrane-bounded organelle;intracellular organelle;intracellular organelle part;intracellular part;macromolecular complex;membrane-bounded organelle;mitochondrion;nuclear chromosome part;nuclear part;nucleoplasm;nucleus;organelle;organelle part;protein complex;synaptonemal complex	Base excision repair	LIG3	ENSG00000005156	ENSP00000262327;ENSP00000367787;ENSP00000465288;ENSP00000466278;ENSP00000467063;ENSP00000467757;ENSP00000468479	E5KLB5;E5KLB6;K7EJR4;K7ELY6;K7ENR9;K7EQB6;K7ERZ5;P49916;Q16714;Q6NVK3	LIG3	DNA ligase 3
0.296911	-0.185021	0.306611	-0.5381	0.250331	-0.00646496	0.197979	0.165236	0.0512273	-0.205385	0.226995	-0.172741	0.380936	-0.0993998	0.46831	0.0795698	-0.109919	-0.566794					RPAP3	ENSG00000005175	ENSP00000005386;ENSP00000370024;ENSP00000401823	B4DRW9;Q6PHR5;Q9H6T3	RPAP3	RNA polymerase II-associated protein 3
0.260897	0.231818	0.132981	0.351814	-0.157365	-0.548161	0.162655	-0.246107	-0.053334	0.0146177	0.297174	0.0909142	0.0952187	-0.38015	-0.0270491	0.115611	0.298357	0.332238		binding;catalytic activity;exonuclease activity;hydrolase activity;hydrolase activity, acting on ester bonds;nuclease activity;nucleic acid binding;nucleotide binding			REXO5	ENSG00000005189	ENSP00000454262;ENSP00000455233;ENSP00000455677;ENSP00000455867;ENSP00000456030;ENSP00000456182;ENSP00000456227;ENSP00000456643;ENSP00000456666;ENSP00000457789;ENSP00000458004	H3BM72;H3BPB2;H3BQ98;H3BQP3;H3BR13;H3BRC7;H3BRG1;H3BSC5;H3BSE4;H3BUT7;H3BV93	LOC81691
0.354202	0.0663309	0.299726	-0.0905266	0.111492	0.37624	0.090235	0.0576899	0.0701101	0.218594	0.0906672	-0.257986	0.13202	-0.223711	0.119121	0.0829277	0.32591	0.102442	anatomical structure development;apoptosis;biological regulation;biosynthetic process;cell death;cellular biosynthetic process;cellular metabolic process;cellular process;cofactor biosynthetic process;cofactor metabolic process;death;developmental process;hemopoiesis;hemopoietic or lymphoid organ development;iron-sulfur cluster assembly;metabolic process;metallo-sulfur cluster assembly;negative r…	2 iron, 2 sulfur cluster binding;binding;catalytic activity;cation binding;electron carrier activity;ion binding;iron-sulfur cluster binding;metal cluster binding;metal ion binding;methyltransferase activity;transferase activity;transferase activity, transferring one-carbon groups	cell part;cytoplasm;cytoplasmic part;intracellular membrane-bounded organelle;intracellular non-membrane-bounded organelle;intracellular organelle;intracellular organelle part;intracellular part;membrane-bounded organelle;membrane-enclosed lumen;mitochondrial intermembrane space;mitochondrial part;mitochondrion;non-membrane-bounded organelle;nuclear part;nucleolus;nucleoplasm;organelle;organelle …		CIAPIN1	ENSG00000005194	ENSP00000377914;ENSP00000454480;ENSP00000455309;ENSP00000455572;ENSP00000456114;ENSP00000457042;ENSP00000457318;ENSP00000457400;ENSP00000457622;ENSP00000458000	A8K8B6;H3BPG7;H3BQ23;H3BT65;H3BTT4;H3BTZ8;H3BUG4;H3BV90;O75206;O75207;Q6FI81;Q9H0W1;Q9P1L7	CIAPIN1	Anamorsin
-1.31529	-0.691569	-0.610046	-0.397779	-0.39772	-0.1948	-0.902232	-0.4292	-0.440733	-0.635115	-1.19472	0.0228438	-1.30479	-0.55741	-1.38371	-0.776731	-0.169318	0.269876	biological regulation;macromolecule metabolic process;membrane protein ectodomain proteolysis;membrane protein intracellular domain proteolysis;membrane protein proteolysis;metabolic process;primary metabolic process;protein metabolic process;proteolysis;regulation of biological process;regulation of immune response;regulation of immune system process;regulation of response to stimulus	aspartic endopeptidase activity, intramembrane cleaving;aspartic-type endopeptidase activity;aspartic-type peptidase activity;binding;catalytic activity;endopeptidase activity;hydrolase activity;identical protein binding;peptidase activity;peptidase activity, acting on L-amino acid peptides;protein binding;protein dimerization activity;protein homodimerization activity	cell part;cytoplasmic part;cytoplasmic vesicle membrane;cytoplasmic vesicle part;endoplasmic reticulum part;endosomal part;endosome membrane;Golgi apparatus part;Golgi membrane;Golgi-associated vesicle membrane;integral to cytosolic side of endoplasmic reticulum membrane;integral to endoplasmic reticulum membrane;integral to lumenal side of endoplasmic reticulum membrane;integral to membrane;inte…		SPPL2B	ENSG00000005206	ENSP00000477658;ENSP00000478298;ENSP00000478510;ENSP00000480311;ENSP00000480813;ENSP00000482362;ENSP00000482470	A0A087WT77;A0A087WWL4;A0A087WZ50;A0A087WZ93;D6W609;O60365;Q567S3;Q8IUH9;Q8TCT7;Q9BUY6;Q9H3M4;Q9NPN2;Q9P1Z6	SPPL2B	Signal peptide peptidase-like 2B
0.158159	0.244174	0.094593	0.140705	0.149949	0.0848074	0.0598109	0.24556	0.156896	0.166215	-0.0931029	0.0722899	-0.106929	-0.110865	-0.0174928	0.328893	0.275764	0.225529			cell part;intracellular membrane-bounded organelle;intracellular organelle;intracellular part;membrane-bounded organelle;nucleus;organelle		FAM214B	ENSG00000005238	ENSP00000319897;ENSP00000367819;ENSP00000367823;ENSP00000367829;ENSP00000474335;ENSP00000474833;ENSP00000475120	B1AML4;B1AML5;D3DRN5;O60377;Q7L5A3;Q9BQ60;Q9HAI9;Q9P1Y9	FAM214B	Protein FAM214B
0.729207	0.432565	0.000733376	0.67825	0.198205	-0.240508	-0.179347	0.39764	0.225483	0.104608	0.226071	0.140152	0.247863	0.376572	0.155109	0.585271	0.275008	0.505783	cellular process;establishment of localization;establishment of localization in cell;establishment of protein localization;intracellular protein transport;intracellular transport;protein transport;transport;vesicle-mediated transport		cell part;cis-Golgi network;COPI vesicle coat;cytoplasmic part;cytoplasmic vesicle part;endoplasmic reticulum-Golgi intermediate compartment membrane;Golgi apparatus part;intracellular organelle part;intracellular part;macromolecular complex;membrane;membrane coat;membrane part;organelle membrane;organelle part;protein complex;vesicle coat		COPZ2	ENSG00000005243	ENSP00000462035;ENSP00000463413;ENSP00000463687;ENSP00000463841;ENSP00000464484;ENSP00000480707	J3KRJ9;J3QL73;J3QLS7;J3QQQ5;J3QS21;Q9P299	COPZ2	Coatomer subunit zeta-2
0.717958	0.33226	0.392982	0.328114	0.497828	0.297623	0.0229814	0.504196	0.410558	0.275534	0.196159	-0.12185	0.377985	0.548829	0.366397	0.197786	-0.139415	-0.314585	activation of phospholipase C activity;activation of protein kinase A activity;activation of protein kinase activity;behavior;biological regulation;blood coagulation;carboxylic acid metabolic process;cell cycle;cell cycle process;cell surface receptor linked signaling pathway;cellular component organization;cellular component organization at cellular level;cellular component organization or bioge…	adenyl nucleotide binding;adenyl ribonucleotide binding;AMP binding;binding;cAMP binding;cAMP-dependent protein kinase inhibitor activity;cAMP-dependent protein kinase regulator activity;cyclic nucleotide binding;enzyme binding;enzyme inhibitor activity;enzyme regulator activity;kinase binding;kinase inhibitor activity;kinase regulator activity;nucleotide binding;protein binding;protein kinase A …	cAMP-dependent protein kinase complex;cell part;cell projection;cell projection part;centrosome;cytoplasm;cytoplasmic part;cytoskeletal part;cytosol;dendritic shaft;dendritic spine;extracellular membrane-bounded organelle;extracellular organelle;extracellular region part;extracellular vesicular exosome;intracellular non-membrane-bounded organelle;intracellular organelle;intracellular organelle pa…	Apoptosis;Insulin signaling pathway	PRKAR2B	ENSG00000005249	ENSP00000265717	A4D0R9;P31323	PRKAR2B	cAMP-dependent protein kinase type II-beta regulatory subunit
0.0635636	0.204497	0.0513611	-0.0267344	-0.0422063	0.227346	0.0488446	0.0241473	0.0715578	-0.00167966	0.27609	0.0244451	0.285972	-0.0182459	0.140458	0.116122	-0.111264	-0.294131	biosynthetic process;cellular biosynthetic process;cellular component organization;cellular component organization at cellular level;cellular component organization or biogenesis;cellular component organization or biogenesis at cellular level;cellular macromolecule biosynthetic process;cellular macromolecule metabolic process;cellular metabolic process;cellular nitrogen compound metabolic process…	binding;DNA binding;histone binding;methylated histone residue binding;nucleic acid binding;nucleic acid binding transcription factor activity;protein binding;sequence-specific DNA binding transcription factor activity	cell part;histone acetyltransferase complex;intracellular membrane-bounded organelle;intracellular organelle;intracellular organelle part;intracellular part;macromolecular complex;membrane-bounded organelle;MSL complex;nuclear part;nucleoplasm;nucleoplasm part;nucleus;organelle;organelle part;protein complex		MSL3	ENSG00000005302	ENSP00000312244;ENSP00000338078;ENSP00000354562;ENSP00000370067;ENSP00000370068;ENSP00000370069;ENSP00000381538;ENSP00000401809;ENSP00000418673;ENSP00000419976	A6NCU2;A6NHW8;A6NLU8;A8K165;B4DUV8;B7Z227;C9JKR8;C9JXM9;F8WC61;H7BYE4;Q8N5Y2;Q9UG70;Q9Y5Z8	MSL3	Male-specific lethal 3 homolog
-0.310433	0.271974	0.173866	0.246563	-0.224872	-0.0741749	0.0615418	0.272811	-0.253858	0.00665355	-0.308327	-0.0632701	0.332735	0.285097	-0.178534	0.0346918	-0.508263	-0.242909	activation of immune response;activation of innate immune response;anatomical structure morphogenesis;biological regulation;biosynthetic process;cell surface receptor linked signaling pathway;cellular biosynthetic process;cellular component assembly;cellular component organization;cellular component organization at cellular level;cellular component organization or biogenesis;cellular component or…	acetyltransferase activity;activating transcription factor binding;bHLH transcription factor binding;binding;catalytic activity;cation binding;chromatin binding;core promoter proximal region DNA binding;core promoter proximal region sequence-specific DNA binding;damaged DNA binding;DNA binding;histone acetyltransferase activity;ion binding;lysine N-acetyltransferase activity;metal ion binding;mol…	cell part;chromatin;chromosomal part;condensed chromosome outer kinetochore;cytoplasm;histone acetyltransferase complex;intracellular membrane-bounded organelle;intracellular organelle;intracellular organelle part;intracellular part;macromolecular complex;membrane-bounded organelle;nuclear body;nuclear chromatin;nuclear chromosome part;nuclear part;nucleoplasm;nucleoplasm part;nucleus;organelle;o…	Adherens junction;Cell cycle;Huntington's disease;Jak-STAT signaling pathway;ko05152;Long-term potentiation;Melanogenesis;Notch signaling pathway;Pathways in cancer;Prostate cancer;Renal cell carcinoma;TGF-beta signaling pathway;Wnt signaling pathway	CREBBP	ENSG00000005339	ENSP00000262367;ENSP00000371502;ENSP00000458254;ENSP00000459490;ENSP00000460474;ENSP00000461002	D3DUC9;I3L0Q1;I3L293;I3L3I5;I3L466;O00147;Q16376;Q4LE28;Q92793	CREBBP	CREB-binding protein
-0.195458	-0.143626	-0.38669	-0.0683756	0.0290585	0.176205	0.335428	0.547785	0.0902255	0.0835874	0.472907	-0.289841	0.0528159	0.395878	0.0591683	0.433427	0.0364175	-0.194509	biological regulation;cellular component assembly;cellular component assembly at cellular level;cellular component organization;cellular component organization at cellular level;cellular component organization or biogenesis;cellular component organization or biogenesis at cellular level;cellular macromolecular complex assembly;cellular macromolecular complex subunit organization;cellular process;…	binding;core promoter proximal region DNA binding;core promoter proximal region sequence-specific DNA binding;DNA binding;nucleic acid binding;nucleic acid binding transcription factor activity;regulatory region DNA binding;regulatory region nucleic acid binding;RNA polymerase II core promoter proximal region sequence-specific DNA binding;RNA polymerase II core promoter proximal region sequence-s…	cell part;intracellular membrane-bounded organelle;intracellular non-membrane-bounded organelle;intracellular organelle;intracellular organelle part;intracellular part;macromolecular complex;membrane-bounded organelle;non-membrane-bounded organelle;nuclear part;nucleolus;nucleoplasm;nucleus;organelle;organelle part;post-mRNA release spliceosomal complex;ribonucleoprotein complex;spliceosomal comp…		GCFC2	ENSG00000005436	ENSP00000318690;ENSP00000386552;ENSP00000409340;ENSP00000415831;ENSP00000437767;ENSP00000474136;ENSP00000474481;ENSP00000475108;ENSP00000475130	A4UHQ8;A4UHQ9;C9JII4;H7C335;O95032;P16383;Q53TY0;Q6P2F2;S4R3C1;S4R461;S4R465	GCFC2	GC-rich sequence DNA-binding factor 2
0.367119	-0.0132847	0.234495	0.299159	0.0834184	0.122061	0.215933	0.0638096	0.217007	0.314352	0.0739102	-0.00223589	0.254376	0.280695	0.195202	0.128942	0.324252	0.043936					WDR54	ENSG00000005448	ENSP00000006526;ENSP00000387236;ENSP00000406606	B9A049;C9J016;D6W5I3;Q53H85;Q86V45;Q9H977	WDR54	WD repeat-containing protein 54
0.249624	0.209988	0.221915	0.121095	-0.236975	-0.0236387	0.132702	0.0848205	0.27324	-0.205817	0.557398	0.10921	0.208673	0.028671	-0.060369	-0.378416	-0.205183	-0.204071	amine metabolic process;betaine metabolic process;carboxylic acid catabolic process;carboxylic acid metabolic process;carboxylic acid transport;carnitine metabolic process;catabolic process;cellular amine metabolic process;cellular amino acid metabolic process;cellular catabolic process;cellular ketone metabolic process;cellular lipid catabolic process;cellular lipid metabolic process;cellular me…	binding;carnitine O-acyltransferase activity;carnitine O-octanoyltransferase activity;catalytic activity;O-acyltransferase activity;octanoyltransferase activity;O-octanoyltransferase activity;protein binding;receptor binding;transferase activity;transferase activity, transferring acyl groups;transferase activity, transferring acyl groups other than amino-acyl groups	cell part;cytoplasmic part;intracellular membrane-bounded organelle;intracellular organelle;intracellular organelle lumen;intracellular organelle part;intracellular part;membrane-bounded organelle;membrane-enclosed lumen;microbody;microbody lumen;microbody part;mitochondrion;organelle;organelle lumen;organelle part;peroxisomal matrix;peroxisomal part;peroxisome	Peroxisome	CROT	ENSG00000005469	ENSP00000331981;ENSP00000404867;ENSP00000411983;ENSP00000413575	A4D1D6;C9J3D7;E7EQF2;Q86V17;Q8IUW9;Q9UKG9;Q9Y6I2	CROT	Peroxisomal carnitine O-octanoyltransferase
-0.301228	-0.0921574	0.0560875	-0.102487	-0.299098	-0.0835619	0.0645449	-0.017452	-0.0304415	0.13157	-0.159321	-0.0500331	-0.0284419	-0.0208762	0.0357194	-0.0453882	-0.215593	-0.364844	biological regulation;biosynthetic process;cell activation;cell communication;cell cycle arrest;cell cycle process;cell differentiation;cellular biosynthetic process;cellular component organization;cellular component organization at cellular level;cellular component organization or biogenesis;cellular component organization or biogenesis at cellular level;cellular developmental process;cellular m…	binding;catalytic activity;cation binding;enzyme binding;histone methyltransferase activity;histone methyltransferase activity (H3-K4 specific);histone-lysine N-methyltransferase activity;ion binding;lysine N-methyltransferase activity;metal ion binding;methyltransferase activity;N-methyltransferase activity;protein binding;protein binding transcription factor activity;protein methyltransferase a…	cell part;cytoplasm;extracellular region part;histone methyltransferase complex;intercellular bridge;intracellular membrane-bounded organelle;intracellular organelle;intracellular organelle part;intracellular part;macromolecular complex;membrane;membrane-bounded organelle;methyltransferase complex;MLL5-L complex;nuclear body;nuclear part;nuclear speck;nucleoplasm;nucleoplasm part;organelle;organe…		KMT2E	ENSG00000005483	ENSP00000257745;ENSP00000312379;ENSP00000333986;ENSP00000335398;ENSP00000417156;ENSP00000417193;ENSP00000417888;ENSP00000419525;ENSP00000419883;ENSP00000420206;ENSP00000420415;ENSP00000473963;ENSP00000482147	A0A087WYW5;B6ZDE4;B6ZDM3;C9JNE1;C9JQ68;C9JYI9;E7ETZ7;F8WAU9;H7C4F3;H7C5C4;M4K8J3;Q6P5Y2;Q6PKG4;Q6T316;Q86TI3;Q86W12;Q86WG0;Q86WL2;Q8IV78;Q8IWR5;Q8IZD2;Q8NFF8;Q9NWE7;S4R363	KMT2E	Histone-lysine N-methyltransferase 2E
-0.720623	-0.464015	-0.369519	-0.601698	-0.477822	-0.157804	-0.380169	-0.555466	-0.538552	-0.189329	-0.453748	-0.252748	-0.774715	-0.5275	-0.395891	-0.38193	0.0408678	0.186592		catalytic activity;endopeptidase activity;hydrolase activity;peptidase activity;peptidase activity, acting on L-amino acid peptides;serine hydrolase activity;serine-type endopeptidase activity;serine-type peptidase activity	cell part;cytoplasmic part;Golgi apparatus;Golgi apparatus part;Golgi membrane;integral to membrane;intracellular membrane-bounded organelle;intracellular organelle;intracellular organelle part;intracellular part;intrinsic to membrane;membrane;membrane part;membrane-bounded organelle;nuclear part;nucleoplasm;nucleus;organelle;organelle membrane;organelle part;perinuclear region of cytoplasm		RHBDD2	ENSG00000005486	ENSP00000006777;ENSP00000314144;ENSP00000391232;ENSP00000403507	Q6NTF9;Q7L534;Q9H5W6;Q9HBK7;Q9UDT1;Q9UDT2	RHBDD2;WUGSC:H_RG122E10.2a	Rhomboid domain-containing protein 2
0.0849316	-0.286531	0.214719	0.123878	-0.12809	0.00320244	0.158696	0.0803301	0.153628	0.141691	0.0824256	-0.0730948	-0.0187373	0.217076	0.169611	0.122282	-0.0821743	-0.355301	biological regulation;calcium ion homeostasis;calcium ion transport;calcium ion transport into cytosol;cation homeostasis;cation transport;cellular calcium ion homeostasis;cellular cation homeostasis;cellular chemical homeostasis;cellular divalent inorganic cation homeostasis;cellular homeostasis;cellular ion homeostasis;cellular metal ion homeostasis;cellular process;chemical homeostasis;cytosol…	binding;enzyme binding;enzyme inhibitor activity;enzyme regulator activity;kinase binding;kinase inhibitor activity;kinase regulator activity;protein binding;protein kinase binding;protein kinase inhibitor activity;protein kinase regulator activity;protein tyrosine kinase inhibitor activity	cell part;cytoplasm;intracellular organelle part;intracellular part;membrane;nuclear part;nucleoplasm;organelle part		IBTK	ENSG00000005700	ENSP00000305721;ENSP00000422136;ENSP00000422762;ENSP00000424634;ENSP00000426405;ENSP00000478891	D6R9F4;E7EPI0;E9PDR5;H0Y9N7;Q2QKU2;Q2QKU3;Q2QKU4;Q5TFD7;Q5TFD9;Q8IUQ9;Q8IUY7;Q8TAI4;Q9HBI8;Q9P2D0;Q9Y3T8	IBTK	Inhibitor of Bruton tyrosine kinase
-0.123925	-0.422702	-0.379029	-0.0841184	-0.102264	-0.0707831	-0.121533	-0.132394	-0.150865	-0.350813	-0.274791	0.0260324	-0.558257	0.223916	0.0214624	-0.26981	-0.383275	-0.146642	biological regulation;biosynthetic process;cellular biosynthetic process;cellular macromolecule biosynthetic process;cellular macromolecule metabolic process;cellular metabolic process;cellular nitrogen compound metabolic process;cellular process;macromolecule biosynthetic process;macromolecule metabolic process;metabolic process;nitrogen compound metabolic process;nucleic acid metabolic process;…	binding;cation binding;DNA binding;ion binding;metal ion binding;nucleic acid binding;transition metal ion binding;zinc ion binding	cell part;intracellular;intracellular membrane-bounded organelle;intracellular organelle;intracellular part;membrane-bounded organelle;nucleus;organelle		ZNF195	ENSG00000005801	ENSP00000005082;ENSP00000344483;ENSP00000346613;ENSP00000382511;ENSP00000387998;ENSP00000390663;ENSP00000414353;ENSP00000431937;ENSP00000432552;ENSP00000432720;ENSP00000433911;ENSP00000434006;ENSP00000434361;ENSP00000434715;ENSP00000435093;ENSP00000435153;ENSP00000435741;ENSP00000435828;ENSP00000436384;ENSP00000437265;ENSP00000477630;ENSP00000482411	A0A087WT67;A8K234;B3KTK2;B4DEL0;C9JG37;C9JLY9;E9PIN4;E9PIT0;E9PIY8;E9PLF5;E9PLW9;E9PMX5;E9PNM0;E9PPF8;E9PSE6;H0YDV1;L7MNK2;O14628;Q0VAJ6;Q658N8;Q6ZNA9	ZNF195	Zinc finger protein 195
-0.284281	-0.519745	-0.309144	-0.141965	-0.230584	-0.105662	-0.389554	-0.417734	-0.488741	-0.283807	-0.340017	-0.209968	-0.349444	-0.181563	-0.290967	-0.302089	-0.457148	-0.656898	anatomical structure morphogenesis;axon guidance;axonogenesis;biological regulation;biosynthetic process;branchiomotor neuron axon guidance;cell part morphogenesis;cell projection morphogenesis;cell projection organization;cellular biosynthetic process;cellular component morphogenesis;cellular component organization;cellular component organization at cellular level;cellular component organization…	acid-amino acid ligase activity;binding;catalytic activity;cation binding;ion binding;ligase activity;ligase activity, forming carbon-nitrogen bonds;metal ion binding;small conjugating protein ligase activity;transition metal ion binding;ubiquitin-protein ligase activity;zinc ion binding	axon;cell part;cell projection;cytoskeleton;intracellular membrane-bounded organelle;intracellular non-membrane-bounded organelle;intracellular organelle;intracellular part;membrane;membrane-bounded organelle;microtubule cytoskeleton;neuron projection;non-membrane-bounded organelle;nucleus;organelle		MYCBP2	ENSG00000005810	ENSP00000349892;ENSP00000413907;ENSP00000444596;ENSP00000481482;ENSP00000483488	A0A087WY34;A0A0C4DGY7;A6NJC6;H7C3U4;O75592;Q5JSX8;Q5VZN6;Q6PIB6;Q9UQ11;Q9Y6E4	MYCBP2	E3 ubiquitin-protein ligase MYCBP2
0.1654	0.123512	0.0976839	0.333436	0.204946	-0.15539	0.128639	0.21075	0.136486	0.158886	0.0337424	-0.0311456	-0.102708	-0.0561345	0.113855	-0.0949621	0.0108032	-0.436736	biological regulation;catabolic process;cellular catabolic process;cellular macromolecule catabolic process;cellular macromolecule metabolic process;cellular metabolic process;cellular process;cellular protein metabolic process;circadian rhythm;entrainment of circadian clock;entrainment of circadian clock by photoperiod;macromolecule catabolic process;macromolecule metabolic process;macromolecule…	acid-amino acid ligase activity;catalytic activity;ligase activity;ligase activity, forming carbon-nitrogen bonds;small conjugating protein ligase activity;ubiquitin-protein ligase activity	cell part;cullin-RING ubiquitin ligase complex;cytoplasm;cytoplasmic part;cytosol;intracellular membrane-bounded organelle;intracellular organelle;intracellular organelle part;intracellular part;macromolecular complex;membrane-bounded organelle;nuclear part;nucleoplasm;nucleus;organelle;organelle part;protein complex;SCF ubiquitin ligase complex;ubiquitin ligase complex	Circadian rhythm - mammal	FBXL3	ENSG00000005812	ENSP00000347834;ENSP00000412183	B2RB04;C9J0Y7;Q9P122;Q9UKT7	FBXL3	F-box/LRR-repeat protein 3
0.415474	0.279061	-0.249963	0.122744	-0.151783	0.156628	0.452827	0.031914	0.351812	0.526886	-0.106324	0.0618911	0.656301	0.113598	0.274078	0.36054	0.192139	0.0999463	alcohol metabolic process;biological regulation;carbohydrate homeostasis;carbohydrate metabolic process;carboxylic acid metabolic process;cation homeostasis;cell communication;cell surface receptor linked signaling pathway;cellular carbohydrate metabolic process;cellular ketone metabolic process;cellular macromolecule metabolic process;cellular metabolic process;cellular process;cellular protein …	adenyl nucleotide binding;adenyl ribonucleotide binding;ATP binding;binding;catalytic activity;identical protein binding;kinase activity;nucleotide binding;phosphotransferase activity, alcohol group as acceptor;protein binding;protein dimerization activity;protein homodimerization activity;protein kinase activity;purine nucleotide binding;purine ribonucleoside triphosphate binding;purine ribonucl…	cell part;cytoplasm;cytoplasmic part;intracellular membrane-bounded organelle;intracellular organelle;intracellular organelle lumen;intracellular organelle part;intracellular part;macromolecular complex;membrane-bounded organelle;membrane-enclosed lumen;mitochondrial matrix;mitochondrial part;mitochondrial pyruvate dehydrogenase complex;mitochondrion;nuclear part;nucleoplasm;organelle;organelle l…		PDK2	ENSG00000005882	ENSP00000007708;ENSP00000420927;ENSP00000421178;ENSP00000423310;ENSP00000425265;ENSP00000425615;ENSP00000427682;ENSP00000481915	A8K3A7;B3KNW0;D6R983;D6RDN9;D6RGV8;D6RHG2;D6RJH7;Q15119;Q6P515;Q9BS05	PDK2	[Pyruvate dehydrogenase (acetyl-transferring)] kinase isozyme 2, mitochondrial
-1.13446	-0.507265	-0.834967	-0.921605	-0.497002	0.0468426	-1.20608	-0.58269	-0.549348	-0.638856	-0.662423	-0.0227427	-0.910678	-0.75559	-0.677164	-0.727297	-0.359583	0.248139	anatomical structure development;behavior;biological adhesion;biological regulation;blood coagulation;cell adhesion;cell differentiation;cell migration;cell motility;cell surface receptor linked signaling pathway;cell-matrix adhesion;cell-substrate adhesion;cellular component maintenance;cellular component maintenance at cellular level;cellular component movement;cellular component organization;c…	binding;cation binding;enzyme binding;glycoprotein binding;ion binding;metal ion binding;protease binding;protein binding;protein dimerization activity;protein heterodimerization activity	adherens junction;alpha3-beta1 integrin complex;anchoring junction;basolateral plasma membrane;cell junction;cell part;cell periphery;cell projection membrane;cell projection part;cell surface;cell-substrate adherens junction;cell-substrate junction;cytoplasmic part;excitatory synapse;external side of plasma membrane;extracellular membrane-bounded organelle;extracellular organelle;extracellular r…	Arrhythmogenic right ventricular cardiomyopathy (ARVC);Dilated cardiomyopathy;ECM-receptor interaction;Focal adhesion;Hematopoietic cell lineage;Hypertrophic cardiomyopathy (HCM);Pathways in cancer;Regulation of actin cytoskeleton;Small cell lung cancer	ITGA3	ENSG00000005884	ENSP00000007722;ENSP00000315190;ENSP00000422826;ENSP00000425980;ENSP00000426142;ENSP00000466652;ENSP00000467851	A7E246;B7ZM80;B9EGQ1;D3DTX4;D3DTX5;D6R9X8;H0YA32;H0YA49;K7EMU3;K7EQJ2;P26006	ITGA3	Integrin alpha-3;Integrin alpha-3 heavy chain;Integrin alpha-3 light chain
-0.270002	-0.282044	-0.142437	0.0948515	0.195195	-0.0146189	-0.101309	-0.247173	-0.0192244	-0.381536	0.113202	-0.261682	-0.0764527	-0.153799	-0.394677	-0.0223598	-0.734473	-0.307796	biological regulation;biosynthetic process;cellular biosynthetic process;cellular macromolecule biosynthetic process;cellular macromolecule metabolic process;cellular metabolic process;cellular nitrogen compound metabolic process;cellular process;macromolecule biosynthetic process;macromolecule metabolic process;metabolic process;nitrogen compound metabolic process;nucleic acid metabolic process;…	binding;cation binding;DNA binding;ion binding;metal ion binding;nucleic acid binding;protein binding transcription factor activity;transcription coactivator activity;transcription cofactor activity;transcription factor binding transcription factor activity	cell part;intracellular membrane-bounded organelle;intracellular organelle;intracellular part;membrane-bounded organelle;nucleus;organelle		ZFX	ENSG00000005889	ENSP00000304985;ENSP00000343384;ENSP00000368475;ENSP00000368486;ENSP00000411637;ENSP00000416298;ENSP00000438233	B9EG97;C9J682;C9JGU9;E9PEP7;O43668;P17010;Q8WYJ8	ZFX	Zinc finger X-chromosomal protein
-0.836795	-1.03699	-0.803199	-0.743083	-0.483563	-0.27152	-1.09957	-0.966377	-0.599202	-0.944483	-0.269131	-0.260295	-1.1883	-0.965684	-0.615222	-0.842912	-0.374902	-0.178584	biological regulation;blood coagulation;cell activation;cellular process;coagulation;establishment of localization;establishment of localization in cell;exocytosis;hemostasis;multicellular organismal process;platelet activation;platelet degranulation;posttranscriptional regulation of gene expression;protein stabilization;regulation of biological process;regulation of biological quality;regulation…	binding;enzyme binding;protein binding	cell part;cytoplasmic part;cytoplasmic vesicle membrane;cytoplasmic vesicle part;endocytic vesicle membrane;endosomal part;endosome;endosome membrane;extracellular membrane-bounded organelle;extracellular organelle;extracellular region part;extracellular vesicular exosome;integral to membrane;intracellular membrane-bounded organelle;intracellular organelle;intracellular organelle part;intracellul…	ko05152;Lysosome;Phagosome	LAMP2	ENSG00000005893	ENSP00000200639;ENSP00000360386;ENSP00000408411;ENSP00000431526	A8K4X5;D3DTF0;H0YCG2;P13473;Q16641;Q6Q3G8;Q96J30;Q99534;Q9UD93	LAMP2	Lysosome-associated membrane glycoprotein 2
-0.173343	-0.101401	-0.315516	-0.016058	-0.202812	0.0860405	-0.195275	-0.121925	-0.268198	0.0422189	0.0750442	-0.138332	-0.390476	-0.0559056	-0.139674	-0.185996	0.234466	0.0354407	alcohol metabolic process;alditol metabolic process;carbohydrate metabolic process;cellular carbohydrate metabolic process;cellular metabolic process;cellular process;glycerol metabolic process;lipid metabolic process;metabolic process;polyol metabolic process;primary metabolic process;small molecule metabolic process	binding;catalytic activity;cation binding;glycerophosphodiester phosphodiesterase activity;glycerophosphoinositol glycerophosphodiesterase activity;hydrolase activity;hydrolase activity, acting on ester bonds;ion binding;metal ion binding;phosphoric diester hydrolase activity;phosphoric ester hydrolase activity	cell part;cytoplasm;integral to membrane;intracellular part;intrinsic to membrane;membrane part		GDE1	ENSG00000006007	ENSP00000261386;ENSP00000454755;ENSP00000456295;ENSP00000457431	H3BNA5;H3BRL5;H3BU22;O43334;Q6PKF7;Q7KYR4;Q9NZC3	GDE1	Glycerophosphodiester phosphodiesterase 1
0.404363	0.472531	0.280809	0.362447	0.165535	0.237148	0.214242	0.319228	0.202187	0.451591	0.269712	0.0984197	0.288726	0.193416	0.381406	0.325467	0.401165	0.250872					REX1BD	ENSG00000006015	ENSP00000351422;ENSP00000398467;ENSP00000469859;ENSP00000471429	E9PAS0;M0QYI9;M0R0T3;Q8NAX4;Q96EN9;Q9NWI0	C19orf60	Uncharacterized protein C19orf60
-0.247962	1.78034	-0.156525	0.110642	-1.77649	0.498977	-0.399081	0.0408251	-0.80573	0.149547	0.443463	-0.0860982	-1.01874	0.779927	-0.114101	1.51582	-1.04241	0.526083	cellular process;cellular response to chemical stimulus;cellular response to cholesterol;cellular response to lipid;cellular response to organic substance;cellular response to stimulus;establishment of localization;lipid transport;organic substance transport;response to chemical stimulus;response to cholesterol;response to lipid;response to organic substance;response to stimulus;transport	binding;cholesterol binding;lipid binding;steroid binding;sterol binding	autophagic vacuole;cell part;cytoplasmic part;cytosol;endoplasmic reticulum part;intracellular membrane-bounded organelle;intracellular organelle;intracellular organelle part;intracellular part;membrane;membrane-bounded organelle;organelle;organelle part;perinuclear endoplasmic reticulum;plasma membrane;vacuole		OSBPL7	ENSG00000006025	ENSP00000007414;ENSP00000376295;ENSP00000463599;ENSP00000464624;ENSP00000479827	D3DTT6;J3QLK7;J3QSC2;Q6PIV6;Q9BZF2	OSBPL7	Oxysterol-binding protein-related protein 7
-0.0938146	-0.0184231	0.31666	-0.0412455	0.376113	-0.120839	-0.207887	-0.0270317	0.0155256	-0.0766346	0.263518	0.152236	0.0567794	0.047838	-0.0690789	-0.108673	0.218335	0.281283			cell part;cytoplasmic part;endoplasmic reticulum;integral to membrane;intracellular membrane-bounded organelle;intracellular organelle;intracellular part;intrinsic to membrane;membrane part;membrane-bounded organelle;organelle		TMEM98	ENSG00000006042	ENSP00000261713;ENSP00000378138;ENSP00000398446;ENSP00000406394;ENSP00000463245;ENSP00000463539;ENSP00000464537	C9J3Y0;C9J6Q8;E1P631;J3QLG7;J3QS57;J9JIC8;Q9UFK2;Q9Y2Y6	TMEM98	Transmembrane protein 98
-0.146405	0.399031	-0.0504646	-0.266534	-0.47872	-0.512083	-0.500996	0.0852191	-0.306924	0.067085	-0.36891	-0.818974	-0.628791	-0.629185	0.1381	0.249011	-0.521459	0.0828249	activation of immune response;activation of innate immune response;activation of MAPK activity;biological regulation;cell surface receptor linked signaling pathway;cellular macromolecule metabolic process;cellular metabolic process;cellular process;cellular protein metabolic process;cellular response to abiotic stimulus;cellular response to external stimulus;cellular response to mechanical stimul…	adenyl nucleotide binding;adenyl ribonucleotide binding;ATP binding;binding;catalytic activity;kinase activity;MAP kinase kinase activity;MAP kinase kinase kinase activity;molecular transducer activity;NF-kappaB-inducing kinase activity;nucleotide binding;phosphotransferase activity, alcohol group as acceptor;protein kinase activity;protein serine/threonine kinase activity;protein serine/threonin…	cell part;cytoplasm;cytoplasmic part;cytosol;intracellular part	Apoptosis;Epithelial cell signaling in Helicobacter pylori infection;Intestinal immune network for IgA production;MAPK signaling pathway;Osteoclast differentiation;T cell receptor signaling pathway	MAP3K14	ENSG00000006062	ENSP00000478552;ENSP00000480974;ENSP00000482657	A0A087WXF1;A8K2D8;D3DX67;Q8IYN1;Q99558	MAP3K14	Mitogen-activated protein kinase kinase kinase 14
-1.60281	0.573887	-0.738217	-0.615753	-0.550117	-0.358791	-1.04314	-0.530371	-0.458301	-0.692911	-0.877228	-0.204416	-0.597548	-0.935619	-0.839698	-0.398962	-0.666576	0.332718			cell part;cytoplasmic part;endoplasmic reticulum membrane;endoplasmic reticulum part;extracellular membrane-bounded organelle;extracellular organelle;extracellular region part;extracellular vesicular exosome;Golgi apparatus part;Golgi membrane;integral to membrane;intracellular organelle part;intracellular part;intrinsic to membrane;membrane;membrane part;membrane-bounded organelle;membrane-bound…		TMEM132A	ENSG00000006118	ENSP00000005286;ENSP00000405823;ENSP00000437848;ENSP00000439716;ENSP00000439717;ENSP00000442754	F5H765;H0YFB3;H0YFQ1;H0YFQ2;Q24JP5;Q69YU7;Q86VZ8;Q86W97;Q9H8K3;Q9HCI9;Q9NWY0	TMEM132A	Transmembrane protein 132A
-0.107955	-0.209058	-0.182082	-0.368301	0.0238538	0.225073	-0.0774133	-0.211032	-0.276236	-0.361431	-0.140942	-0.0344615	0.148838	-0.104934	-0.163304	-0.184054	-0.160959	-0.126997	antigen processing and presentation;antigen processing and presentation of exogenous antigen;antigen processing and presentation of exogenous peptide antigen;antigen processing and presentation of exogenous peptide antigen via MHC class II;antigen processing and presentation of peptide antigen;antigen processing and presentation of peptide antigen via MHC class II;antigen processing and presentat…	binding;clathrin binding;peptide binding;protein binding;protein transporter activity;signal sequence binding;substrate-specific transporter activity;transporter activity	AP-2 adaptor complex;AP-type membrane coat adaptor complex;cell part;clathrin adaptor complex;clathrin coated vesicle membrane;clathrin-coated endocytic vesicle membrane;coated vesicle membrane;cytoplasmic part;cytoplasmic vesicle membrane;cytoplasmic vesicle part;cytosol;endocytic vesicle membrane;intracellular membrane-bounded organelle;intracellular organelle;intracellular organelle part;intra…	Endocrine and other factor-regulated calcium reabsorption;Endocytosis;Huntington's disease	AP2B1	ENSG00000006125	ENSP00000464966;ENSP00000465357;ENSP00000465848;ENSP00000466580;ENSP00000466812;ENSP00000467382;ENSP00000468183;ENSP00000468813;ENSP00000478115;ENSP00000478471;ENSP00000479691;ENSP00000481246;ENSP00000481704;ENSP00000482315;ENSP00000482825;ENSP00000482835;ENSP00000483185;ENSP00000484708;ENSP00000487324	A0A087WU93;A0A087WXS3;A0A087WYD1;A0A087WZQ6;A0A087X253;A6NJP3;K7EJ01;K7EJX1;K7EKZ5;K7EMN7;K7EN71;K7ERB2;P21851;P63010;Q7Z451;Q96J19	AP2B1	AP-2 complex subunit beta
0.0507047	0.236018	-0.113179	-0.191799	0.0081377	0.0757651	0.0764763	-0.114736	0.0815704	0.847968	0.0881095	-0.338976	0.448139	-0.0978167	-0.352355	-0.0281038	0.491303	0.254662	biological regulation;biosynthetic process;cellular biosynthetic process;cellular macromolecule biosynthetic process;cellular macromolecule metabolic process;cellular metabolic process;cellular nitrogen compound metabolic process;cellular process;macromolecule biosynthetic process;macromolecule metabolic process;metabolic process;negative regulation of biological process;negative regulation of bi…	binding;cation binding;DNA binding;ion binding;metal ion binding;nucleic acid binding;nucleic acid binding transcription factor activity;sequence-specific DNA binding transcription factor activity	cell part;cytoplasm;cytoskeleton;intracellular membrane-bounded organelle;intracellular non-membrane-bounded organelle;intracellular organelle;intracellular organelle part;intracellular part;membrane-bounded organelle;microtubule cytoskeleton;non-membrane-bounded organelle;nuclear part;nucleoplasm;nucleus;organelle;organelle part		ZNF263	ENSG00000006194	ENSP00000219069;ENSP00000444497;ENSP00000458214;ENSP00000459998;ENSP00000460278;ENSP00000461146;ENSP00000461755;ENSP00000461861	B2R634;B4DI05;I3L0N0;I3L2X3;I3L393;I3L4C4;I3L538;I3NI39;O14978;O43387;Q96H95	ZNF263	Zinc finger protein 263
0.172158	0.0826426	-0.118557	0.357345	-0.0194907	0.129147	-0.402017	0.365662	-0.0385716	0.402699	-0.0183282	0.324022	-0.445552	0.033159	0.123198	-0.0431986	-0.0268831	0.243601	cell differentiation;cellular developmental process;cellular process;developmental process;gamete generation;male gamete generation;multicellular organismal development;multicellular organismal process;multicellular organismal reproductive process;reproductive process;spermatogenesis	catalytic activity	extracellular region		SPATA20	ENSG00000006282	ENSP00000006658;ENSP00000348878;ENSP00000422378;ENSP00000423643;ENSP00000424215;ENSP00000424538;ENSP00000425271;ENSP00000426025;ENSP00000426228;ENSP00000426608;ENSP00000427374;ENSP00000483295	D6R947;D6RBE2;D6RC70;D6RIU6;H0Y9M1;H0Y9W3;Q2TA99;Q2XUZ6;Q6P0P1;Q8TB22;Q8WVW3;Q9H747	SPATA20	Spermatogenesis-associated protein 20
-0.137529	0.0415497	-0.255748	-0.184218	0.0136714	-0.151888	-0.424388	-0.0963733	-0.0586884	-0.280507	-0.0477242	-0.0298953	-0.302208	0.0528133	-0.398828	0.0944777	-0.161498	0.118922	anatomical structure formation involved in morphogenesis;angiogenesis;biological adhesion;biological regulation;cell adhesion;cell-substrate adhesion;cellular process;developmental process;positive regulation of apoptosis;positive regulation of axon extension;positive regulation of axonogenesis;positive regulation of biological process;positive regulation of cell death;positive regulation of cell…		cell part;cell projection;cell surface;integral to membrane;intrinsic to membrane;membrane;membrane part;plasma membrane;ruffle	Cytokine-cytokine receptor interaction	TNFRSF12A	ENSG00000006327	ENSP00000326737;ENSP00000343894;ENSP00000458305;ENSP00000458898;ENSP00000460610;ENSP00000461756	D3DUA6;I3L0S4;I3L1J9;I3L3P4;I3L539;Q9HCS0;Q9NP84	TNFRSF12A	Tumor necrosis factor receptor superfamily member 12A
-0.142167	0.144749	0.0671797	-0.105598	0.0927382	-0.08885	-0.0976732	0.373021	0.128836	0.0517704	-0.473254	0.0538321	-0.152416	0.214462	0.356243	0.242404	-0.49906	0.396429	activation of JNKK activity;activation of JUN kinase activity;activation of MAPK activity;activation of MAPKK activity;activation of protein kinase activity;apoptosis;biological regulation;biosynthetic process;cell death;cellular biosynthetic process;cellular macromolecule biosynthetic process;cellular macromolecule metabolic process;cellular metabolic process;cellular nitrogen compound metabolic…	adenyl nucleotide binding;adenyl ribonucleotide binding;ATP binding;binding;catalytic activity;identical protein binding;JUN kinase kinase kinase activity;kinase activity;MAP kinase kinase activity;MAP kinase kinase kinase activity;molecular transducer activity;nucleotide binding;phosphotransferase activity, alcohol group as acceptor;protein binding;protein dimerization activity;protein homodimer…		MAPK signaling pathway	MAP3K9	ENSG00000006432	ENSP00000370649;ENSP00000451038;ENSP00000451263;ENSP00000451612;ENSP00000451921;ENSP00000480011	A0A087WW79;A3KN85;G3V347;G3V4P9;J3KPI6;P80192;Q0D2G7;Q6EH31;Q9H2N5	MAP3K9	Mitogen-activated protein kinase kinase kinase 9
0.24433	0.208279	0.0892143	0.148694	0.1315	-0.0599813	0.249583	0.119343	0.318259	0.299027	0.252111	0.0929017	0.271426	0.247316	0.238325	0.176517	0.260201	-0.0509298	actin cytoskeleton organization;actin cytoskeleton reorganization;actin filament-based process;biological regulation;cell surface receptor linked signaling pathway;cellular component organization;cellular component organization at cellular level;cellular component organization or biogenesis;cellular component organization or biogenesis at cellular level;cellular localization;cellular process;cell…	ATPase binding;binding;catalytic activity;cytoskeletal protein binding;Edg-2 lysophosphatidic acid receptor binding;endothelial differentiation G-protein coupled receptor binding;enzyme binding;GDP binding;G-protein-coupled receptor binding;GTP binding;GTPase activity;guanyl nucleotide binding;guanyl ribonucleotide binding;hydrolase activity;hydrolase activity, acting on acid anhydrides;hydrolase…	adherens junction;anchoring junction;cell division site part;cell junction;cell part;cell surface;cell-substrate adherens junction;cell-substrate junction;cleavage furrow;cytoplasmic part;cytoplasmic vesicle membrane;cytoplasmic vesicle part;extracellular membrane-bounded organelle;extracellular organelle;extracellular region part;extracellular vesicular exosome;focal adhesion;intracellular organ…	Pancreatic cancer;Pathways in cancer	RALA	ENSG00000006451	ENSP00000005257;ENSP00000388975;ENSP00000413227	A4D1W3;C9JPE8;H7C3P7;P11233	RALA	Ras-related protein Ral-A
0.64994	1.00273	-0.089411	0.827288	0.697437	0.923762	-0.782409	1.31029	-1.39069	0.190716	-1.36014	-0.418921	-1.34067	0.194965	-1.29401	-0.15224	-0.184424	0.307991	actin crosslink formation;actin cytoskeleton organization;actin filament bundle assembly;actin filament organization;actin filament-based process;biological regulation;cell surface receptor linked signaling pathway;cellular component assembly;cellular component assembly at cellular level;cellular component organization;cellular component organization at cellular level;cellular component organizat…	binding;binding, bridging;cytoskeletal adaptor activity;cytoskeletal protein binding;proline-rich region binding;protein binding;protein binding, bridging	cell part;cytoplasm;cytoplasmic part;cytoskeleton;cytosol;extracellular membrane-bounded organelle;extracellular organelle;extracellular region part;extracellular vesicular exosome;intracellular non-membrane-bounded organelle;intracellular organelle;intracellular organelle part;intracellular part;membrane;membrane-bounded organelle;membrane-bounded vesicle;non-membrane-bounded organelle;nuclear p…		BAIAP2L1	ENSG00000006453	ENSP00000005260	A4D268;Q75L21;Q75L22;Q96CV4;Q9H5F5;Q9UHR4;Q9Y2M8	BAIAP2L1	Brain-specific angiogenesis inhibitor 1-associated protein 2-like protein 1
-0.213156	-0.504116	-0.479537	-0.117671	-0.59207	-0.320656	-0.13177	-0.0501163	-0.392766	-0.029423	-0.000890255	0.209823	-0.203952	-0.457112	-0.277428	-0.150546	-0.403991	-0.264728	anatomical structure development;biological regulation;biosynthetic process;cellular biosynthetic process;cellular component organization;cellular component organization at cellular level;cellular component organization or biogenesis;cellular component organization or biogenesis at cellular level;cellular macromolecule biosynthetic process;cellular macromolecule metabolic process;cellular metabol…	binding;catalytic activity;cation binding;demethylase activity;histone binding;histone demethylase activity;histone demethylase activity (H3-K27 specific);histone demethylase activity (H3-K36 specific);histone demethylase activity (H3-K9 specific);histone demethylase activity (H4-K20 specific);ion binding;iron ion binding;metal ion binding;methylated histone residue binding;oxidoreductase activit…	cell part;intracellular membrane-bounded organelle;intracellular non-membrane-bounded organelle;intracellular organelle;intracellular organelle part;intracellular part;membrane-bounded organelle;non-membrane-bounded organelle;nuclear part;nucleolus;nucleoplasm;nucleus;organelle;organelle part		KDM7A	ENSG00000006459	ENSP00000380692;ENSP00000420143	A4D1S9;C9JJH9;C9JQU2;H9KVD6;Q6MZL8;Q6ZMT4;Q9C0E5	KDM7A	Lysine-specific demethylase 7A
0.456417	-0.0638599	0.279371	0.222803	0.266249	0.0169106	0.107506	0.0225623	0.297704	0.205413	0.268014	0.0594144	-0.0142941	0.0397136	0.326775	-0.0650759	0.222287	-0.259898	anatomical structure development;axon guidance;behavior;biological regulation;biosynthetic process;cell development;cell differentiation;cellular biosynthetic process;cellular developmental process;cellular macromolecule biosynthetic process;cellular macromolecule metabolic process;cellular metabolic process;cellular nitrogen compound metabolic process;cellular process;chemotaxis;developmental pr…	binding;core promoter proximal region DNA binding;core promoter proximal region sequence-specific DNA binding;DNA binding;nucleic acid binding;nucleic acid binding transcription factor activity;regulatory region DNA binding;regulatory region nucleic acid binding;RNA polymerase II core promoter proximal region sequence-specific DNA binding;RNA polymerase II core promoter proximal region sequence-s…	cell part;intracellular membrane-bounded organelle;intracellular organelle;intracellular part;membrane-bounded organelle;nucleus;organelle		ETV1	ENSG00000006468	ENSP00000242066;ENSP00000382293;ENSP00000384085;ENSP00000384138;ENSP00000385381;ENSP00000385551;ENSP00000385686;ENSP00000391043;ENSP00000393078;ENSP00000394710;ENSP00000405327;ENSP00000406931;ENSP00000410819;ENSP00000411626;ENSP00000413836	A4D118;B2R768;B5MCT2;B7Z2I4;B7Z618;B7Z9P2;C9J0B7;C9J4P4;C9J9L1;C9JQH6;C9JT37;C9JX69;E9PHB1;F5GXR2;F8WEH6;O75849;P50549;Q4KMQ6;Q59GA7;Q6AI30;Q9UQ71;Q9Y636	ETV1	ETS translocation variant 1
0.0453351	0.0587201	-0.170029	0.149709	-0.0820117	-0.0877337	0.0976813	-0.0416367	0.286529	-0.189741	0.383426	0.37556	-0.465301	0.357101	-0.281592	0.0167694	0.163129	0.147602	activation of protein kinase activity;activation of protein kinase C activity by G-protein coupled receptor protein signaling pathway;biological regulation;biosynthetic process;cell surface receptor linked signaling pathway;cellular biosynthetic process;cellular lipid metabolic process;cellular metabolic process;cellular process;cellular response to stimulus;ceramide biosynthetic process;ceramide…	acylglycerol kinase activity;adenyl nucleotide binding;adenyl ribonucleotide binding;ATP binding;binding;catalytic activity;ceramide kinase activity;diacylglycerol kinase activity;kinase activity;lipid kinase activity;NAD+ kinase activity;nucleotide binding;phosphotransferase activity, alcohol group as acceptor;purine nucleotide binding;purine ribonucleoside triphosphate binding;purine ribonucleo…	cell part;cytoplasmic part;intracellular membrane-bounded organelle;intracellular organelle;intracellular organelle part;intracellular part;membrane;membrane-bounded organelle;mitochondrial membrane;mitochondrial part;mitochondrion;organelle;organelle membrane;organelle part	Glycerolipid metabolism	AGK	ENSG00000006530	ENSP00000347581;ENSP00000418789;ENSP00000458417;ENSP00000418101;ENSP00000420540;ENSP00000420776;ENSP00000487274	Q53H12;Q75KN1;Q96GC3;Q9NP48;E9PC15;E9PG39;F8WDD1	AGK;AGK	Acylglycerol kinase, mitochondrial
0.409179	0.272321	0.193924	0.282995	-0.0390611	0.176206	0.0478613	0.255166	0.0396497	0.28127	-0.0687089	0.0300317	0.228922	0.276409	0.189406	0.49772	0.11204	0.247492	alcohol catabolic process;alcohol metabolic process;aldehyde catabolic process;catabolic process;cellular aldehyde metabolic process;cellular catabolic process;cellular metabolic process;cellular process;cellular response to chemical stimulus;cellular response to oxidative stress;cellular response to stimulus;cellular response to stress;ethanol catabolic process;ethanol metabolic process;lipid me…	3-chloroallyl aldehyde dehydrogenase activity;aldehyde dehydrogenase [NAD(P)+] activity;catalytic activity;oxidoreductase activity;oxidoreductase activity, acting on the aldehyde or oxo group of donors;oxidoreductase activity, acting on the aldehyde or oxo group of donors, NAD or NADP as acceptor	cell part;cytoplasm;cytoplasmic part;cytosol;extracellular membrane-bounded organelle;extracellular organelle;extracellular region part;extracellular vesicular exosome;intracellular part;membrane;membrane-bounded organelle;membrane-bounded vesicle;organelle;plasma membrane;vesicle	beta-Alanine metabolism;Drug metabolism - cytochrome P450;Glycolysis / Gluconeogenesis;Histidine metabolism;Metabolism of xenobiotics by cytochrome P450;Phenylalanine metabolism;Tyrosine metabolism	ALDH3B1	ENSG00000006534	ENSP00000473990;ENSP00000477789;ENSP00000478380;ENSP00000478486;ENSP00000478632;ENSP00000479948;ENSP00000481604;ENSP00000483988;ENSP00000484901	A0A087WTE0;A0A087WU54;A0A087WUF8;A0A087X192;A0A087X2D4;A3FMP9;P43353;Q53XL5;Q8N515;Q96CK8;Q9BUJ8	ALDH3B1	Aldehyde dehydrogenase family 3 member B1
-0.960392	-0.589684	-0.234438	-1.02293	-0.252675	-0.036952	-0.806347	-0.637168	-0.477675	-0.543188	0.0470719	-0.137526	-0.574127	-0.838868	-0.331939	-0.895151	-0.062377	-0.088557	biological regulation;biosynthetic process;cellular biosynthetic process;cellular macromolecule biosynthetic process;cellular macromolecule metabolic process;cellular metabolic process;cellular nitrogen compound metabolic process;cellular process;macromolecule biosynthetic process;macromolecule metabolic process;metabolic process;nitrogen compound metabolic process;nucleic acid metabolic process;…	binding;DNA binding;nucleic acid binding	cell part;cytoplasmic part;endoplasmic reticulum;intracellular membrane-bounded organelle;intracellular organelle;intracellular part;membrane-bounded organelle;nucleus;organelle		PHTF2	ENSG00000006576	ENSP00000248550;ENSP00000275575;ENSP00000307699;ENSP00000387355;ENSP00000400958;ENSP00000403042;ENSP00000403620;ENSP00000408035	A0JP04;A0JP05;A4D1C2;B3KQZ2;E9PEE3;G5E9H7;Q6NW35;Q8N3S3;Q8TBW4;Q9H099	PHTF2	Putative homeodomain transcription factor 2
0.135367	-0.319198	-0.307591	0.102295	0.0821004	-0.213741	0.580161	0.251393	-1.09851	0.302105	0.671569	-0.711703	0.44521	0.310443	-0.509739	0.278395	-0.184424	-0.154352	biological regulation;cell chemotaxis;cell communication;cell migration;cell motility;cell-cell signaling;cellular component movement;cellular component organization;cellular component organization or biogenesis;cellular process;cellular response to chemical stimulus;cellular response to stimulus;chemotaxis;defense response;immune response;immune system process;inflammatory response;locomotion;po…	binding;chemokine activity;chemokine receptor binding;cytokine activity;cytokine receptor binding;G-protein-coupled receptor binding;protein binding;receptor binding	extracellular region part;extracellular space	Chemokine signaling pathway;Cytokine-cytokine receptor interaction	CCL26	ENSG00000006606	ENSP00000005180;ENSP00000378365	A0N0Q5;Q52LV8;Q9Y258	CCL26	C-C motif chemokine 26
-0.219964	-0.25061	-0.316073	0.255342	0.0788655	0.157977	0.116017	-0.217714	-0.321745	-0.139229	0.167079	0.0662189	-0.229065	-0.161678	-0.361495	-0.104428	0.25941	-0.127078	actin cytoskeleton organization;actin cytoskeleton reorganization;actin filament-based process;axon guidance;biological adhesion;biological regulation;cell adhesion;cell differentiation;cell maturation;cell surface receptor linked signaling pathway;cellular component assembly;cellular component organization;cellular component organization at cellular level;cellular component organization or bioge…	enzyme regulator activity;GTPase regulator activity;guanyl-nucleotide exchange factor activity;nucleoside-triphosphatase regulator activity;Rac guanyl-nucleotide exchange factor activity;Ras guanyl-nucleotide exchange factor activity;Rho guanyl-nucleotide exchange factor activity;small GTPase regulator activity	cell part;cytoplasm;cytoplasmic part;cytoskeleton;cytosol;extrinsic to membrane;intracellular non-membrane-bounded organelle;intracellular organelle;intracellular part;membrane part;non-membrane-bounded organelle;organelle	Adherens junction	FARP2	ENSG00000006607	ENSP00000264042;ENSP00000362384;ENSP00000388167;ENSP00000393376;ENSP00000403437;ENSP00000411353;ENSP00000412772;ENSP00000415474;ENSP00000486597	B7Z6J8;C9JVQ5;C9JWM9;F5GZ84;H7C210;H7C3E4;H7C3M7;H7C447;O94887;Q53QM5;Q8WU27;Q9UFE7	FARP2	FERM, RhoGEF and pleckstrin domain-containing protein 2
0.303548	0.157805	0.354109	0.201328	0.227597	0.284351	0.691322	0.318026	0.454961	0.180054	0.475111	0.451369	0.183144	-0.129141	0.477818	0.0956669	0.722466	0.417734	amine biosynthetic process;amine metabolic process;apoptotic mitochondrial changes;biosynthetic process;carboxylic acid biosynthetic process;carboxylic acid metabolic process;cellular amine metabolic process;cellular amino acid biosynthetic process;cellular amino acid metabolic process;cellular biosynthetic process;cellular component organization;cellular component organization at cellular level;…	binding;catalytic activity;gamma-glutamylcyclotransferase activity;identical protein binding;protein binding;protein dimerization activity;protein homodimerization activity;transferase activity;transferase activity, transferring acyl groups;transferase activity, transferring amino-acyl groups	cell part;cytoplasmic part;cytosol;extracellular membrane-bounded organelle;extracellular organelle;extracellular region part;extracellular vesicular exosome;intracellular part;membrane-bounded organelle;membrane-bounded vesicle;organelle;vesicle	Glutathione metabolism	GGCT	ENSG00000006625	ENSP00000005374;ENSP00000275428;ENSP00000386610;ENSP00000386686;ENSP00000387235;ENSP00000387809;ENSP00000390094;ENSP00000408015	A0A0B4J1Y4;B2RDN0;B8ZZK2;B8ZZN4;B8ZZR8;H7BZK5;O75223;Q9BS37	GGCT	Gamma-glutamylcyclotransferase
0.327385	0.0156698	0.337559	0.298986	0.0777526	0.27859	0.170792	0.426889	-0.127808	0.0831764	-0.0514827	-0.0951295	0.385808	0.169764	0.301049	0.109514	-0.159603	-0.597695	biological regulation;biosynthetic process;cell cycle;cell cycle process;cellular biosynthetic process;cellular macromolecule biosynthetic process;cellular macromolecule metabolic process;cellular metabolic process;cellular nitrogen compound metabolic process;cellular process;DNA metabolic process;DNA replication;G1/S transition of mitotic cell cycle;macromolecule biosynthetic process;macromolecu…	binding;cation binding;enzyme activator activity;enzyme regulator activity;ion binding;metal ion binding;nucleic acid binding;transition metal ion binding;zinc ion binding	cell part;intracellular organelle part;intracellular part;nuclear part;nucleoplasm;organelle part	Cell cycle	DBF4	ENSG00000006634	ENSP00000265728;ENSP00000389397;ENSP00000407116;ENSP00000414083	A4D1D8;A8K954;B4DXK0;F8WF77;O75226;Q75MS6;Q75N01;Q9UBU7;Q9Y2M6	DBF4	Protein DBF4 homolog A
0.0976965	0.121741	-0.31342	0.152418	0.365455	0.193434	0.360331	0.518179	0.137045	0.116046	-0.107912	0.0666599	0.393457	-0.102716	-0.198675	0.807715	0.656878	0.371001	biological regulation;blood coagulation;calcium ion homeostasis;cation homeostasis;cell activation;cell surface receptor linked signaling pathway;cellular calcium ion homeostasis;cellular cation homeostasis;cellular chemical homeostasis;cellular divalent inorganic cation homeostasis;cellular homeostasis;cellular ion homeostasis;cellular metal ion homeostasis;cellular process;cellular response to …	enzyme regulator activity;G-protein coupled receptor activity;GTPase regulator activity;guanyl-nucleotide exchange factor activity;icosanoid receptor activity;molecular transducer activity;nucleoside-triphosphatase regulator activity;prostanoid receptor activity;receptor activity;signal transducer activity;signaling receptor activity;thromboxane A2 receptor activity;thromboxane receptor activity;…	acrosomal vesicle;cell part;cytoplasmic membrane-bounded vesicle;cytoplasmic part;cytoplasmic vesicle;integral to membrane;integral to plasma membrane;intracellular membrane-bounded organelle;intracellular organelle;intracellular part;intrinsic to membrane;intrinsic to plasma membrane;membrane;membrane part;membrane-bounded organelle;membrane-bounded vesicle;organelle;plasma membrane;plasma membr…	Calcium signaling pathway;Neuroactive ligand-receptor interaction	TBXA2R	ENSG00000006638	ENSP00000364336;ENSP00000393333;ENSP00000468145	K7ER80;O75228;P21731;Q6DK52;Q9UCY1;Q9UCY2	TBXA2R	Thromboxane A2 receptor
-0.116843	-0.363803	-0.0529594	-0.215781	-0.143573	0.0285845	-0.297257	-0.232003	0.118863	-0.357318	0.241095	-0.231933	-0.200716	-0.455727	0.168291	-0.0307188	0.311493	-0.095844	adult somatic muscle development;anatomical structure development;cell fate determination;cellular developmental process;cellular process;developmental process;multicellular organismal development;multicellular organismal process;muscle structure development;myoblast cell fate determination;somatic muscle development		cell part;intracellular membrane-bounded organelle;intracellular organelle;intracellular part;membrane-bounded organelle;nucleus;organelle		IFRD1	ENSG00000006652	ENSP00000005558;ENSP00000384477;ENSP00000391379;ENSP00000397314;ENSP00000397592;ENSP00000402177;ENSP00000402453;ENSP00000403203;ENSP00000413893;ENSP00000435635;ENSP00000437250;ENSP00000439188;ENSP00000483255	B7Z5G1;C9J311;C9J7U6;C9JA65;C9JFH1;C9JK78;C9JLG5;C9JNM6;E9PMY4;H0YEE3;O00458;O75234;Q5U013;Q9BVE4	IFRD1	Interferon-related developmental regulator 1
-0.521745	0.407518	0.0475121	-0.414496	0.0311742	0.16477	0.340095	-0.0404012	-0.0756834	0.0989459	-0.158798	-0.0537257	-0.428722	0.0801446	-0.368383	0.127659	-0.0475426	-0.115008	aerobic respiration;biosynthetic process;cellular biosynthetic process;cellular component assembly;cellular component assembly at cellular level;cellular component organization;cellular component organization at cellular level;cellular component organization or biogenesis;cellular component organization or biogenesis at cellular level;cellular macromolecular complex assembly;cellular macromolecul…	catalytic activity;farnesyltranstransferase activity;prenyltransferase activity;protoheme IX farnesyltransferase activity;transferase activity;transferase activity, transferring alkyl or aryl (other than methyl) groups	cell part;cytochrome complex;cytoplasmic part;integral to membrane;intracellular membrane-bounded organelle;intracellular organelle;intracellular organelle part;intracellular part;intrinsic to membrane;macromolecular complex;membrane;membrane part;membrane-bounded organelle;mitochondrial inner membrane;mitochondrial membrane;mitochondrial part;mitochondrion;organelle;organelle inner membrane;orga…	Oxidative phosphorylation;Porphyrin and chlorophyll metabolism	COX10	ENSG00000006695	ENSP00000261643;ENSP00000397750;ENSP00000462190;ENSP00000462512	B2R6U5;B4DJ50;H7C101;J3KRW4;J3KSJ3;O15334;Q12887;Q969F7	COX10	Protoheme IX farnesyltransferase, mitochondrial
-0.173838	0.593692	0.0915046	0.0120974	-0.607908	0.233145	-0.107179	0.403395	-0.0443108	0.0624235	-0.0164175	0.140933	-0.128362	-0.129762	0.152416	-0.175728	0.367714	0.217659	biological regulation;biosynthetic process;cellular biosynthetic process;cellular macromolecule biosynthetic process;cellular macromolecule metabolic process;cellular metabolic process;cellular nitrogen compound metabolic process;cellular process;developmental process;macromolecule biosynthetic process;macromolecule metabolic process;metabolic process;multicellular organismal development;multicel…	binding;DNA binding;nucleic acid binding;nucleic acid binding transcription factor activity;sequence-specific distal enhancer binding RNA polymerase II transcription factor activity;sequence-specific DNA binding RNA polymerase II transcription factor activity;sequence-specific DNA binding transcription factor activity	cell part;cytoplasm;intracellular membrane-bounded organelle;intracellular organelle;intracellular organelle part;intracellular part;membrane-bounded organelle;nuclear part;nucleoplasm;nucleus;organelle;organelle part	Basal transcription factors	GTF2IRD1	ENSG00000006704	ENSP00000265755;ENSP00000397566;ENSP00000408477;ENSP00000417909;ENSP00000418383	E9PFE2;H7C4Q8;O95444;Q6DSU6;Q75MX7;Q86UM3;Q8WVC4;Q9UHK8;Q9UHL9;Q9UI91	GTF2IRD1	General transcription factor II-I repeat domain-containing protein 1
0.252225	0.132652	0.129268	0.145795	0.113801	0.127295	0.122223	0.116797	0.148872	0.0466583	0.109625	0.177447	-0.0735164	0.300987	0.0673423	0.0308237	0.0689878	0.116457	biological regulation;biosynthetic process;cell fate commitment;cell fate commitment involved in formation of primary germ layers;cell surface receptor linked signaling pathway;cellular biosynthetic process;cellular component assembly;cellular component assembly at cellular level;cellular component organization;cellular component organization at cellular level;cellular component organization or b…	basal RNA polymerase II transcription machinery binding;basal transcription machinery binding;binding;chromatin binding;enzyme binding;protein binding;RNA polymerase binding;RNA polymerase core enzyme binding;RNA polymerase II core binding	Cdc73/Paf1 complex;cell part;cytoplasm;intracellular organelle part;intracellular part;macromolecular complex;membrane;nuclear part;nucleoplasm part;organelle part;protein complex;transcription elongation factor complex		PAF1	ENSG00000006712	ENSP00000221265;ENSP00000396412;ENSP00000468874;ENSP00000469742	B4DGJ5;M0QX35;M0QYC7;O75239;Q8N7H5;Q9H166;Q9NUU9	PAF1	RNA polymerase II-associated factor 1 homolog
0.121495	0.0412617	0.248458	0.50827	0.286227	0.0699759	0.113066	0.112016	0.240361	-0.172608	0.228114	-0.0318103	0.411994	0.315981	0.202302	0.189969	-0.221785	-0.342997	biological regulation;cellular component organization;cellular component organization at cellular level;cellular component organization or biogenesis;cellular component organization or biogenesis at cellular level;cellular membrane fusion;cellular membrane organization;cellular process;establishment of localization;establishment of localization in cell;establishment of protein localization;establ…	binding;cation binding;enzyme binding;GTPase binding;ion binding;metal ion binding;protein binding;transition metal ion binding;zinc ion binding	cell part;CORVET complex;cytoplasmic membrane-bounded vesicle;cytoplasmic part;cytoplasmic vesicle;cytoskeleton;cytosol;early endosome;endosomal part;endosome;Golgi apparatus part;Golgi-associated vesicle;HOPS complex;intracellular membrane-bounded organelle;intracellular non-membrane-bounded organelle;intracellular organelle;intracellular organelle part;intracellular part;late endosome;lysosomal…		VPS41	ENSG00000006715	ENSP00000265745;ENSP00000309457;ENSP00000379297;ENSP00000391980;ENSP00000395410;ENSP00000398584;ENSP00000407835;ENSP00000411919;ENSP00000412974	C9J2U9;C9J3F8;C9JU58;C9JZ11;E9PF36;H7BXH3;H7BZX6;H7C0K2;P49754;Q86TP8;Q99851;Q99852	VPS41	Vacuolar protein sorting-associated protein 41 homolog
-0.395148	-0.45147	-0.167808	-0.475781	-0.388011	0.0790405	-0.314282	-0.346364	-0.148934	-0.419654	-0.253024	-0.0662999	-0.228191	-0.360113	-0.292647	-0.399239	-0.302431	-0.117759	cellular component organization;cellular component organization at cellular level;cellular component organization or biogenesis;cellular component organization or biogenesis at cellular level;cellular macromolecule metabolic process;cellular metabolic process;cellular nitrogen compound metabolic process;cellular process;macromolecule metabolic process;metabolic process;mitochondrial RNA 3'-end pr…	3'-tRNA processing endoribonuclease activity;binding;catalytic activity;cation binding;endonuclease activity;endonuclease activity, active with either ribo- or deoxyribonucleic acids and producing 5'-phosphomonoesters;endoribonuclease activity;endoribonuclease activity, producing 5'-phosphomonoesters;hydrolase activity;hydrolase activity, acting on ester bonds;ion binding;metal ion binding;nuclea…	cell part;cytoplasmic part;intracellular membrane-bounded organelle;intracellular organelle;intracellular organelle part;intracellular part;membrane-bounded organelle;mitochondrion;nuclear part;nucleoplasm;nucleus;organelle;organelle part	RNA transport	ELAC2	ENSG00000006744	ENSP00000337445;ENSP00000379291;ENSP00000405223;ENSP00000406192;ENSP00000463321;ENSP00000463594;ENSP00000463740;ENSP00000463884;ENSP00000464358;ENSP00000477044;ENSP00000477093;ENSP00000477482	B4DPL9;E7ES68;G5E9D5;H7C2I4;J3QL08;J3QLK4;J3QQT1;J3QRS2;Q6IA94;Q9BQ52;Q9HAS8;Q9HAS9;Q9NVT1;V9GYS7;V9GYU5;V9GZ72	ELAC2	Zinc phosphodiesterase ELAC protein 2
-1.04461	-1.04038	-1.02326	-0.789453	-0.272662	0.102592	-0.588637	-0.706316	-0.774798	-0.936929	0.0387778	-0.271719	-0.687116	-0.774008	-0.310252	-0.746421	-0.372628	0.22595	cellular lipid metabolic process;cellular macromolecule metabolic process;cellular metabolic process;cellular process;cellular protein metabolic process;glycolipid metabolic process;glycosphingolipid metabolic process;lipid metabolic process;macromolecule metabolic process;macromolecule modification;membrane lipid metabolic process;metabolic process;post-translational protein modification;primary…	arylsulfatase activity;binding;catalytic activity;cation binding;hydrolase activity;hydrolase activity, acting on ester bonds;ion binding;metal ion binding;sulfuric ester hydrolase activity	cell part;cytoplasmic part;endoplasmic reticulum lumen;endoplasmic reticulum part;extracellular membrane-bounded organelle;extracellular organelle;extracellular region part;extracellular vesicular exosome;intracellular membrane-bounded organelle;intracellular organelle;intracellular organelle lumen;intracellular organelle part;intracellular part;lysosome;lytic vacuole;membrane-bounded organelle;m…		ARSD	ENSG00000006756	ENSP00000370546;ENSP00000409180;ENSP00000453789	H0YMY1;H7C327;P51689;Q9UHJ8	ARSD	Arylsulfatase D
-0.217956	-0.243909	-0.0357828	-0.048171	-0.192938	-0.0202217	-0.17867	0.0139182	-0.142354	-0.244618	0.00850439	0.159059	-0.192988	-0.0844586	-0.31532	-0.0651093	0.0396385	0.0318205	adiponectin-mediated signaling pathway;anatomical structure development;biological regulation;carboxylic acid metabolic process;cell surface receptor linked signaling pathway;cellular ketone metabolic process;cellular lipid metabolic process;cellular metabolic process;cellular process;cellular response to chemical stimulus;cellular response to cytokine stimulus;cellular response to endogenous sti…	binding;hormone binding;receptor activity	cell part;integral to membrane;intrinsic to membrane;membrane;membrane part;plasma membrane	Adipocytokine signaling pathway	ADIPOR2	ENSG00000006831	ENSP00000349616	Q53YY5;Q86V24;Q9H737	ADIPOR2	Adiponectin receptor protein 2
0.594798	-0.319198	0.647554	1.54975	-0.78799	-1.36574	0.406625	-1.36528	-1.1683	0.915082	0.37238	-0.432727	-0.156241	-0.942538	-0.213091	-1.14973	-2.38606	-0.633115	biological regulation;cellular macromolecule metabolic process;cellular metabolic process;cellular process;cellular protein metabolic process;macromolecule metabolic process;macromolecule modification;metabolic process;negative regulation of axon extension;negative regulation of axonogenesis;negative regulation of biological process;negative regulation of cell development;negative regulation of c…	adenyl nucleotide binding;adenyl ribonucleotide binding;ATP binding;binding;catalytic activity;cyclin-dependent protein kinase activity;kinase activity;nucleotide binding;phosphotransferase activity, alcohol group as acceptor;protein kinase activity;protein serine/threonine kinase activity;purine nucleotide binding;purine ribonucleoside triphosphate binding;purine ribonucleotide binding;ribonucle…	cell part;cytoplasm;intracellular membrane-bounded organelle;intracellular organelle;intracellular part;membrane-bounded organelle;nucleus;organelle		CDKL3	ENSG00000006837	ENSP00000265334;ENSP00000427738;ENSP00000427836;ENSP00000427964;ENSP00000428498;ENSP00000428500;ENSP00000428689;ENSP00000430496;ENSP00000430777	B4DX41;D3DQA0;D3DQA1;E5RFT9;E5RGK4;E5RI54;E7ET86;H0YAP8;H0YB17;Q8IVW4;Q9P114	CDKL3	Cyclin-dependent kinase-like 3
0.291901	0.257217	0.338998	0.250463	0.000284672	0.543483	0.101259	0.55639	0.386301	0.125874	0.137151	0.160747	0.231913	0.324882	0.300479	0.396606	0.282321	0.872575	anatomical structure development;biological regulation;cell cycle process;cell surface receptor linked signaling pathway;cellular component organization;cellular component organization at cellular level;cellular component organization or biogenesis;cellular component organization or biogenesis at cellular level;cellular macromolecule metabolic process;cellular metabolic process;cellular process;c…	adenyl nucleotide binding;adenyl ribonucleotide binding;ATP binding;binding;catalytic activity;cytoskeletal protein binding;gamma-tubulin binding;kinase activity;microtubule binding;nucleotide binding;phosphotransferase activity, alcohol group as acceptor;protein binding;protein kinase activity;protein serine/threonine kinase activity;purine nucleotide binding;purine ribonucleoside triphosphate b…	cell part;cell projection;centrosome;cytoplasm;cytoplasmic part;cytoskeletal part;cytoskeleton;cytosol;gamma-tubulin complex;intracellular non-membrane-bounded organelle;intracellular organelle;intracellular organelle part;intracellular part;macromolecular complex;microtubule;microtubule cytoskeleton;microtubule organizing center;microtubule organizing center part;neuron projection;non-membrane-b…		MARK4	ENSG00000007047	ENSP00000262891;ENSP00000300843;ENSP00000465414;ENSP00000465613;ENSP00000466702;ENSP00000466843;ENSP00000480702;ENSP00000484974	K7EK17;K7EKG8;K7EN95;Q6IPE9;Q8NG37;Q96GZ3;Q96JG7;Q96L34;Q96SQ2;Q9BYD8	MARK4	MAP/microtubule affinity-regulating kinase 4
0.520988	0.605915	0.515418	0.752816	0.47995	0.371222	0.375655	0.229676	0.462101	0.662115	0.233465	0.55435	0.123281	0.351367	0.246638	0.392072	0.610339	0.735757	cell cycle;cell division;cellular process		cell part;cytoplasm;cytoplasmic part;cytoskeletal part;intracellular organelle part;intracellular part;membrane;microtubule organizing center;midbody;organelle part;plasma membrane		CCDC124	ENSG00000007080	ENSP00000408730;ENSP00000471455;ENSP00000472520	M0R2F5;Q96CT7	CCDC124	Coiled-coil domain-containing protein 124
0.0127957	0.123746	0.0493917	0.0447979	0.117821	0.0144377	0.0374129	-0.0310314	0.224074	0.0825193	0.099339	-0.0894713	0.0221992	-0.0315745	0.144741	-0.0161104	-0.0115318	0.119123	acrosome assembly;actin cytoskeleton organization;actin filament-based process;adult behavior;adult locomotory behavior;alcohol metabolic process;ameboidal cell migration;amine metabolic process;anatomical structure development;anatomical structure formation involved in morphogenesis;anatomical structure morphogenesis;axon cargo transport;axonogenesis;behavior;biological regulation;brain morphoge…	binding;carbohydrate binding;cytoskeletal protein binding;dynactin binding;dynein binding;enzyme binding;glycosaminoglycan binding;heparin binding;identical protein binding;microtubule binding;pattern binding;phospholipase binding;phosphoprotein binding;polysaccharide binding;protein binding;protein dimerization activity;protein homodimerization activity;tubulin binding	astral microtubule;axon;cell body;cell cortex;cell leading edge;cell part;cell projection;cell projection part;centrosome;chromosomal part;cilium;cytoplasmic microtubule;cytoplasmic part;cytoskeletal part;cytosol;envelope;extracellular membrane-bounded organelle;extracellular organelle;extracellular region part;extracellular vesicular exosome;growth cone;intracellular non-membrane-bounded organel…	Ether lipid metabolism	PAFAH1B1	ENSG00000007168	ENSP00000380378;ENSP00000460258;ENSP00000460591;ENSP00000461087	B2R7Q7;I3L384;I3L3N5;I3L495;P43034;Q8WZ88;Q8WZ89	PAFAH1B1	Platelet-activating factor acetylhydrolase IB subunit alpha
-0.211694	-0.117564	-0.277216	0.0585995	0.030087	-0.0809059	-0.427571	-0.00337481	0.140577	-0.244362	-0.284899	-0.111892	-0.248407	0.0335214	-0.085916	0.013258	-0.0556374	0.260951			extracellular region		KIAA0100	ENSG00000007202	ENSP00000436773;ENSP00000446443;ENSP00000463618;ENSP00000466636;ENSP00000467716;ENSP00000467944	A6NCX3;J3QLM5;K7EMT1;K7EQ86;K7EQR3;Q08E86;Q14667;Q3SYN5;Q49A07;Q5H9T4;Q6WG74;Q6ZP51;Q96HH8	KIAA0100	Protein KIAA0100
0.9103	0.499562	0.20269	0.874428	-0.0853324	0.125283	0.452881	0.234518	-0.0427687	0.792225	0.10144	0.335282	0.981263	0.420847	0.540869	0.680342	0.543771	0.236718	cellular process;establishment of localization;transport;vesicle-mediated transport		cell part;cytoplasmic part;endoplasmic reticulum;Golgi apparatus;intracellular membrane-bounded organelle;intracellular organelle;intracellular part;membrane-bounded organelle;organelle		TRAPPC6A	ENSG00000007255	ENSP00000006275;ENSP00000468182;ENSP00000468363;ENSP00000468612	K7ERB1;K7ERQ4;O75865;Q9BQ45;Q9P092	TRAPPC6A	Trafficking protein particle complex subunit 6A
-0.202134	-0.139288	-0.669573	-0.0547051	-0.211961	0.0622005	-0.441792	-0.577622	0.0197728	-0.787786	-0.323275	-0.192852	-0.629965	-0.478971	-0.202009	-0.179277	-0.400743	0.0212009	biological regulation;negative regulation of biological process;negative regulation of cell growth;negative regulation of cellular process;negative regulation of growth;regulation of biological process;regulation of cell growth;regulation of cellular component organization;regulation of cellular process;regulation of growth		cell part;integral to membrane;intrinsic to membrane;membrane part		ST7L	ENSG00000007341	ENSP00000345312;ENSP00000350734;ENSP00000353972;ENSP00000358678;ENSP00000358680;ENSP00000358683;ENSP00000413718;ENSP00000417140;ENSP00000436499;ENSP00000436544	A8K4S7;H0Y7M0;Q49AH6;Q5TEH7;Q5TEI4;Q5U5K6;Q6N067;Q7Z2Z0;Q7Z3C2;Q8N7P8;Q8TDW1;Q8TDW2;Q8TDW3;Q8TDW4;Q9NXF3	ST7L	Suppressor of tumorigenicity 7 protein-like
-0.211904	-0.209573	0.0260663	0.28672	-0.1634	-0.294284	-0.00141883	0.125861	0.0715277	-0.077141	0.41578	-0.213161	-0.175977	-0.512584	0.219577	-0.492653	-0.100108	-0.350628	ameboidal cell migration;anatomical structure development;anatomical structure morphogenesis;anterior/posterior pattern specification;astrocyte differentiation;axis specification;axon guidance;biological regulation;biosynthetic process;blood vessel development;carbohydrate homeostasis;cell cycle process;cell development;cell differentiation;cell fate commitment;cell fate determination;cell fate s…	acid-amino acid ligase activity;AT DNA binding;binding;catalytic activity;chromatin binding;core promoter binding;core promoter proximal region DNA binding;core promoter proximal region sequence-specific DNA binding;core promoter sequence-specific DNA binding;DNA binding;double-stranded DNA binding;enzyme binding;histone acetyltransferase binding;kinase binding;ligase activity;ligase activity, fo…	cell part;chromatin;chromosomal part;cytoplasm;intracellular membrane-bounded organelle;intracellular organelle;intracellular organelle part;intracellular part;membrane-bounded organelle;nuclear chromatin;nuclear chromosome part;nuclear part;nucleoplasm;nucleus;organelle;organelle part	Maturity onset diabetes of the young	PAX6	ENSG00000007372	ENSP00000241001;ENSP00000368401;ENSP00000368403;ENSP00000368406;ENSP00000368410;ENSP00000368418;ENSP00000368424;ENSP00000368427;ENSP00000388132;ENSP00000397384;ENSP00000404100;ENSP00000404356;ENSP00000431585;ENSP00000480026	B1B1I8;B1B1I9;B1B1J0;E9PKM0;P26367;Q6N006;Q99413	PAX6	Paired box protein Pax-6
0.475059	0.311046	0.220444	0.333035	0.230472	0.190649	0.187074	0.585002	0.336623	0.44701	-0.15969	-0.196322	0.28807	0.392411	0.23536	0.359553	0.335144	-0.015548	cellular macromolecule metabolic process;cellular metabolic process;cellular nitrogen compound metabolic process;cellular process;macromolecule metabolic process;macromolecule modification;metabolic process;nitrogen compound metabolic process;nucleic acid metabolic process;nucleobase-containing compound metabolic process;primary metabolic process;pseudouridine synthesis;RNA metabolic process;RNA …	binding;catalytic activity;intramolecular transferase activity;isomerase activity;nucleic acid binding;pseudouridine synthase activity;RNA binding			RPUSD1	ENSG00000007376	ENSP00000007264;ENSP00000454616;ENSP00000455026;ENSP00000455862;ENSP00000456231;ENSP00000456545;ENSP00000456692;ENSP00000457527;ENSP00000457722;ENSP00000458059	D3DU66;H3BMZ6;H3BQN8;H3BRG3;H3BS55;H3BSG4;H3BU91;H3BUN6;H3BVD0;Q9UJJ7	RPUSD1	RNA pseudouridylate synthase domain-containing protein 1
-0.375249	-0.300215	0.0685644	-0.378096	-0.245533	0.0743151	-0.491762	-0.243313	-0.168299	0.0017364	-0.306201	-0.0950313	-0.505668	-0.246633	-0.426921	-0.596479	-0.653268	0.285765	biological regulation;cell migration;cell motility;cell proliferation;cellular component movement;cellular process;establishment of localization;establishment of protein localization;locomotion;macromolecule metabolic process;metabolic process;negative regulation of biological process;negative regulation of cellular process;negative regulation of protein secretion;negative regulation of protein t…	catalytic activity;endopeptidase activity;hydrolase activity;peptidase activity;peptidase activity, acting on L-amino acid peptides;serine hydrolase activity;serine-type endopeptidase activity;serine-type peptidase activity	cell part;cytoplasmic part;endoplasmic reticulum membrane;endoplasmic reticulum part;Golgi apparatus part;Golgi membrane;integral to membrane;intracellular organelle part;intracellular part;intrinsic to membrane;membrane;membrane part;organelle membrane;organelle part		RHBDF1	ENSG00000007384	ENSP00000262316;ENSP00000394427;ENSP00000406397;ENSP00000408915;ENSP00000411508;ENSP00000412218	A0A0A6YYT0;A2IDA2;B8ZZ07;F6XBT0;F8WBS4;F8WCF7;H0Y6L9;Q04842;Q1W6H2;Q4TT59;Q96CC6;Q96S34;Q9H6E1	RHBDF1	Inactive rhomboid protein 1
-0.0657728	0.290094	-0.0478973	-0.116345	-0.000907421	-0.0121078	0.0787289	-0.083792	0.106991	-0.0636084	-0.3829	0.0101647	0.073627	-0.412718	-0.454168	-0.081502	-0.108028	-0.0623195	biological regulation;cellular component assembly;cellular component assembly at cellular level;cellular component organization;cellular component organization at cellular level;cellular component organization or biogenesis;cellular component organization or biogenesis at cellular level;cellular macromolecular complex assembly;cellular macromolecular complex subunit organization;cellular process;…	binding;identical protein binding;mRNA binding;nucleic acid binding;protein binding;RNA binding	cell part;intracellular organelle part;intracellular part;macromolecular complex;nuclear part;organelle part;ribonucleoprotein complex;small nuclear ribonucleoprotein complex;U1 snRNP		LUC7L	ENSG00000007392	ENSP00000293872;ENSP00000337507;ENSP00000380882;ENSP00000380885;ENSP00000390953;ENSP00000393551;ENSP00000406695;ENSP00000407781;ENSP00000409977;ENSP00000413033;ENSP00000414508;ENSP00000414860;ENSP00000485761	A8MYV2;B8ZZ08;B8ZZ09;B8ZZ10;B8ZZ12;B8ZZ13;F2Z322;F8WBC1;H7C2U4;Q96S32;Q9NPH4;Q9NQ29	LUC7L	Putative RNA-binding protein Luc7-like 1
0.274362	0.420003	0.185749	0.363946	0.448361	0.330265	0.209423	0.264251	0.440071	0.447882	0.152977	0.137072	0.476589	0.509074	0.410049	0.349916	0.259383	0.695282	cellular macromolecule metabolic process;cellular metabolic process;cellular nitrogen compound metabolic process;cellular process;macromolecule metabolic process;maturation of SSU-rRNA;metabolic process;ncRNA metabolic process;ncRNA processing;nitrogen compound metabolic process;nucleic acid metabolic process;nucleobase-containing compound metabolic process;primary metabolic process;RNA metabolic…				TSR3	ENSG00000007520	ENSP00000007390;ENSP00000455722	H3BQD4;Q6PJT8;Q9UJK0	TSR3	Ribosome biogenesis protein TSR3 homolog
-0.124501	0.579357	0.0334454	0.261408	-0.161701	-0.213741	-0.212193	0.478409	0.488454	0.0785806	-0.663452	0.675877	-0.467722	0.194965	0.0983067	0.836229	0.189034	0.214882	biosynthetic process;carbohydrate metabolic process;cellular biosynthetic process;cellular lipid metabolic process;cellular macromolecule metabolic process;cellular metabolic process;cellular process;cellular protein metabolic process;C-terminal protein amino acid modification;C-terminal protein lipidation;glycerolipid biosynthetic process;glycerolipid metabolic process;glycerophospholipid biosyn…	acetylglucosaminyltransferase activity;catalytic activity;phosphatidylinositol N-acetylglucosaminyltransferase activity;transferase activity;transferase activity, transferring glycosyl groups;transferase activity, transferring hexosyl groups;UDP-glycosyltransferase activity	cell part;cytoplasmic part;endoplasmic reticulum membrane;endoplasmic reticulum part;glycosylphosphatidylinositol-N-acetylglucosaminyltransferase (GPI-GnT) complex;integral to membrane;intracellular organelle part;intracellular part;intrinsic to membrane;macromolecular complex;membrane;membrane part;organelle membrane;organelle part;protein complex	Glycosylphosphatidylinositol(GPI)-anchor biosynthesis	PIGQ	ENSG00000007541	ENSP00000026218;ENSP00000293874;ENSP00000326674;ENSP00000386554;ENSP00000386760;ENSP00000387820;ENSP00000409341;ENSP00000410434;ENSP00000413753;ENSP00000439374;ENSP00000439650	A2IDE1;B8ZZ29;B8ZZ31;B8ZZC7;D3DU52;E7ERP4;H0YFM9;H7C336;J3QTH6;O14927;Q96G00;Q96S22;Q9BRB3;Q9UJH4	PIGQ	Phosphatidylinositol N-acetylglucosaminyltransferase subunit Q
-0.412121	-0.3369	-1.10488	-0.122672	0.127424	-0.164273	-0.0168746	-0.0116422	-0.63862	0.215948	0.0881095	-0.426045	-0.243804	-0.0363605	-0.598624	-0.334765	-0.230718	-0.060396		binding;chromatin binding;DNA binding;nucleic acid binding	cell part;intracellular membrane-bounded organelle;intracellular organelle;intracellular part;membrane-bounded organelle;nucleus;organelle		CRAMP1	ENSG00000007545	ENSP00000293925;ENSP00000380559;ENSP00000399172	A8MZL1;B1AJY1;H7C194;Q8NDN1;Q96RY5;Q9P2C1	CRAMP1L	Protein cramped-like
-0.090193	0.186038	0.437836	0.307936	-0.192939	0.318272	0.379696	0.0643065	-0.224883	-0.0278876	0.317932	-0.226276	0.505925	-0.21623	-0.0272241	0.155321	0.600837	0.79219	biological regulation;biosynthetic process;cellular biosynthetic process;cellular macromolecule metabolic process;cellular metabolic process;cellular nitrogen compound metabolic process;cellular process;cellular response to stimulus;female pregnancy;gene expression;hippo signaling cascade;intracellular signal transduction;macromolecule metabolic process;metabolic process;multi-organism process;ni…	binding;DNA binding;nucleic acid binding;nucleic acid binding transcription factor activity;protein binding;RNA polymerase II transcription factor binding;sequence-specific DNA binding transcription factor activity;transcription factor binding	cell part;intracellular membrane-bounded organelle;intracellular organelle;intracellular organelle part;intracellular part;macromolecular complex;membrane-bounded organelle;nuclear part;nucleoplasm;nucleoplasm part;nucleus;organelle;organelle part;protein complex;transcription factor complex		TEAD3	ENSG00000007866	ENSP00000345772;ENSP00000384577;ENSP00000416400	B5MCM0;H7C4A7;O95910;Q5BJG7;Q8N6Y4;Q99594	TEAD3	Transcriptional enhancer factor TEF-5
0.194439	0.418554	0.0282459	0.425896	-0.0372186	-0.0311499	-0.330043	0.0772107	-0.0410569	0.034415	-0.152169	0.144388	0.279418	0.381757	-0.133237	0.249265	-0.121506	0.190912			cell part;cytoplasmic part;extracellular membrane-bounded organelle;extracellular organelle;extracellular region part;extracellular vesicular exosome;intracellular organelle part;intracellular part;membrane;membrane-bounded organelle;membrane-bounded vesicle;mitochondrial inner membrane;mitochondrial membrane;mitochondrial part;organelle;organelle inner membrane;organelle membrane;organelle part;…		DNAJC11	ENSG00000007923	ENSP00000294401;ENSP00000366800;ENSP00000410194;ENSP00000415871	B1AK20;Q4VWF5;Q5TH61;Q5VZN0;Q6PK20;Q6PK70;Q8NDM2;Q96CL7;Q9NVH1	DNAJC11	DnaJ homolog subfamily C member 11
-0.786631	0.395825	0.454909	0.492421	-0.0680981	-0.596211	-0.150141	0.162006	-0.961849	0.599986	0.37238	-0.242764	-0.0891266	0.366576	0.17992	0.111653	-0.184424	-0.443144	anatomical structure development;biological regulation;cellular component movement;cellular macromolecule metabolic process;cellular metabolic process;cellular process;cellular protein metabolic process;chemical homeostasis;cholesterol homeostasis;developmental process;homeostatic process;lipid homeostasis;macromolecule metabolic process;macromolecule modification;metabolic process;negative regul…	acid-amino acid ligase activity;binding;catalytic activity;cation binding;cytoskeletal protein binding;ion binding;ligase activity;ligase activity, forming carbon-nitrogen bonds;metal ion binding;protein binding;small conjugating protein ligase activity;transition metal ion binding;ubiquitin-protein ligase activity;zinc ion binding	cell part;cytoplasm;cytoskeleton;extrinsic to membrane;intracellular;intracellular non-membrane-bounded organelle;intracellular organelle;intracellular part;membrane;membrane part;non-membrane-bounded organelle;organelle;plasma membrane		MYLIP	ENSG00000007944	ENSP00000008686;ENSP00000349298	A6NHZ0;Q5TIA4;Q5TIA5;Q8WY64;Q9BU73;Q9NRL9;Q9UHE7	MYLIP	E3 ubiquitin-protein ligase MYLIP
-0.028609	0.786597	0.389889	0.645173	0.146027	0.201296	0.241242	0.649269	0.668202	0.738759	0.205079	-0.163082	0.0211554	0.455201	0.442955	0.84776	0.00694132	0.467783	biological regulation;biosynthetic process;cell cycle;cellular biosynthetic process;cellular macromolecule metabolic process;cellular metabolic process;cellular nitrogen compound metabolic process;cellular process;cellular response to stimulus;induction of apoptosis;induction of apoptosis by intracellular signals;induction of programmed cell death;intracellular signal transduction;macromolecule m…	binding;core promoter binding;DNA binding;nucleic acid binding;nucleic acid binding transcription factor activity;protein binding;regulatory region DNA binding;regulatory region nucleic acid binding;sequence-specific DNA binding transcription factor activity;transcription factor binding;transcription regulatory region DNA binding	cell part;intracellular organelle part;intracellular part;macromolecular complex;nuclear part;nucleoplasm;nucleoplasm part;organelle part;protein complex;transcription factor complex	Bladder cancer;Cell cycle;Chronic myeloid leukemia;Glioma;Melanoma;Non-small cell lung cancer;Pancreatic cancer;Pathways in cancer;Prostate cancer;Small cell lung cancer	E2F2	ENSG00000007968	ENSP00000355249	B2R9W1;Q14209;Q7Z6H1	E2F2	Transcription factor E2F2
0.284716	0.0976191	0.314431	0.0259914	0.273138	0.233259	0.397823	0.232569	0.25463	0.209506	0.398338	0.000440121	0.233636	0.106024	0.320748	0.224586	0.435801	0.261887	activation of immune response;activation of innate immune response;anaphase-promoting complex-dependent proteasomal ubiquitin-dependent protein catabolic process;antigen processing and presentation;antigen processing and presentation of exogenous antigen;antigen processing and presentation of exogenous peptide antigen;antigen processing and presentation of exogenous peptide antigen via MHC class …	catalytic activity;endopeptidase activity;hydrolase activity;peptidase activity;peptidase activity, acting on L-amino acid peptides;threonine-type endopeptidase activity;threonine-type peptidase activity	cell part;cytoplasm;cytoplasmic part;cytosol;extracellular membrane-bounded organelle;extracellular organelle;extracellular region part;extracellular vesicular exosome;intracellular membrane-bounded organelle;intracellular organelle;intracellular organelle part;intracellular part;macromolecular complex;membrane-bounded organelle;membrane-bounded vesicle;nuclear part;nucleoplasm;nucleus;organelle;…	Proteasome	PSMB1	ENSG00000008018	ENSP00000262193	B5BU76;P20618;Q9BWA8	PSMB1	Proteasome subunit beta type-1
-0.432641	-0.428269	-0.13736	-0.256248	-0.0894418	0.0500898	-0.142282	-0.157799	-0.590335	0.219837	0.0277591	-0.0576596	-0.0987687	-0.239288	-0.378018	-0.181293	-0.00021553	0.043752	anatomical structure development;biological regulation;biosynthetic process;cell differentiation;cellular biosynthetic process;cellular component organization;cellular component organization at cellular level;cellular component organization or biogenesis;cellular component organization or biogenesis at cellular level;cellular developmental process;cellular macromolecule biosynthetic process;cellu…	binding;chromatin binding;DNA binding;nucleic acid binding	cell part;ESC/E(Z) complex;histone methyltransferase complex;intracellular membrane-bounded organelle;intracellular organelle;intracellular organelle part;intracellular part;macromolecular complex;membrane-bounded organelle;methyltransferase complex;nuclear part;nucleoplasm;nucleoplasm part;nucleus;organelle;organelle part;PcG protein complex;protein complex		JARID2	ENSG00000008083	ENSP00000341280;ENSP00000380478	A8K9Z6;B7Z5S5;B7Z8L0;Q5U5L5;Q86X63;Q92833	JARID2	Protein Jumonji
0.0484893	-0.266086	0.237004	-0.124292	-0.269773	-0.412723	-0.497679	0.118418	-0.182584	0.15548	0.286223	0.0507317	-0.0955529	0.332469	-0.231001	-0.15497	-0.249716	-0.149172	biological regulation;cell migration;cell motility;cellular component movement;cellular macromolecule metabolic process;cellular metabolic process;cellular process;cellular protein metabolic process;locomotion;macromolecule metabolic process;macromolecule modification;metabolic process;neuron migration;phosphate-containing compound metabolic process;phosphorus metabolic process;phosphorylation;po…	adenyl nucleotide binding;adenyl ribonucleotide binding;ATP binding;binding;catalytic activity;cyclin-dependent protein kinase activity;enzyme binding;GTPase binding;kinase activity;nucleotide binding;phosphotransferase activity, alcohol group as acceptor;protein binding;protein kinase activity;protein serine/threonine kinase activity;purine nucleotide binding;purine ribonucleoside triphosphate b…	cell part;cell projection cytoplasm;cell projection membrane;cell projection part;cytoplasm;cytoplasmic part;dendrite cytoplasm;dendrite terminus;dendritic growth cone;growth cone;intracellular membrane-bounded organelle;intracellular organelle;intracellular organelle part;intracellular part;leading edge membrane;membrane part;membrane-bounded organelle;nuclear part;nucleoplasm;nucleus;organelle;…		CDKL5	ENSG00000008086	ENSP00000369325;ENSP00000369332;ENSP00000485184;ENSP00000485244;ENSP00000485359;ENSP00000485581;ENSP00000485625	A0A096LNR9;A0A096LP32;A0A096LPG3;A0A096LPI4;G9B9X4;O76039;Q14198;Q5H985;Q8IYC7;Q9UJL6	CDKL5	Cyclin-dependent kinase-like 5
0.0749938	0.335667	0.0637188	-0.396206	-0.063776	0.0560188	-0.0572689	-0.385617	0.448843	-0.406846	0.286681	-0.141743	0.0174828	0.354164	0.0914826	0.466031	0.237599	-0.111162	ATP metabolic process;biosynthetic process;cellular biosynthetic process;cellular metabolic process;cellular nitrogen compound biosynthetic process;cellular nitrogen compound metabolic process;cellular process;coenzyme biosynthetic process;coenzyme metabolic process;cofactor biosynthetic process;cofactor metabolic process;heterocycle biosynthetic process;heterocycle metabolic process;metabolic pr…	adenyl nucleotide binding;adenyl ribonucleotide binding;ATP binding;binding;catalytic activity;cation binding;ion binding;kinase activity;metal ion binding;NAD+ kinase activity;nucleotide binding;phosphotransferase activity, alcohol group as acceptor;purine nucleotide binding;purine ribonucleoside triphosphate binding;purine ribonucleotide binding;ribonucleotide binding;transferase activity;trans…	cell part;cytoplasmic part;cytosol;intracellular part	Nicotinate and nicotinamide metabolism	NADK	ENSG00000008130	ENSP00000339727;ENSP00000341679;ENSP00000344340;ENSP00000367890;ENSP00000462589;ENSP00000462999;ENSP00000464096;ENSP00000464137	A0A0A0MR98;A6NNN3;A8K296;B7Z434;F5GXR5;J3KSP9;J3KTI3;J3QR86;J3QRC0;O95544;Q5QPS4;Q9H2P2;Q9H931	NADK	NAD kinase
0.164962	0.0599556	-0.109995	-0.100632	-0.219508	0.00328779	0.0106218	0.132368	-0.196254	0.0615256	-0.23888	0.118859	0.166374	-0.0478914	-0.0456119	0.248647	-0.313158	0.347944	biological regulation;cellular process;establishment of cell polarity;establishment of epithelial cell polarity;establishment of localization;establishment of localization in cell;establishment or maintenance of cell polarity;Golgi vesicle transport;intracellular transport;positive regulation of biological process;positive regulation of catalytic activity;positive regulation of cell adhesion;posi…	ARF guanyl-nucleotide exchange factor activity;binding;enzyme regulator activity;GTPase regulator activity;guanyl-nucleotide exchange factor activity;lipid binding;nucleoside-triphosphatase regulator activity;phosphatidylinositol binding;phosphatidylinositol-3,4,5-trisphosphate binding;phospholipid binding;small GTPase regulator activity	cell part;cell projection;cytoplasmic part;cytosol;extrinsic to internal side of plasma membrane;extrinsic to membrane;extrinsic to plasma membrane;intracellular part;membrane;membrane part;plasma membrane;plasma membrane part;ruffle		CYTH3	ENSG00000008256	ENSP00000297044;ENSP00000379967	A4D2N8;O43739	CYTH3	Cytohesin-3
-0.542705	-0.915842	-0.867019	-0.905926	-0.887526	-0.798704	-1.23558	-0.129479	-0.49407	-0.150013	-0.289751	0.0280409	-0.590643	-0.278966	-0.631045	-1.49964	-0.506352	-0.0481527	adult behavior;adult locomotory behavior;anatomical structure development;axon ensheathment;behavior;biological adhesion;biological regulation;cell adhesion;cellular process;central nervous system development;developmental process;ensheathment of neurons;locomotory behavior;multicellular organismal process;myelination;myelination in peripheral nervous system;negative regulation of biological proc…	binding;catalytic activity;cation binding;endopeptidase activity;hydrolase activity;integrin binding;ion binding;metal ion binding;metalloendopeptidase activity;metallopeptidase activity;peptidase activity;peptidase activity, acting on L-amino acid peptides;protein binding;protein complex binding;receptor binding;transition metal ion binding;zinc ion binding	axon;cell part;cell projection;integral to membrane;intrinsic to membrane;membrane part;neuron projection		ADAM22	ENSG00000008277	ENSP00000265727;ENSP00000381260;ENSP00000381261;ENSP00000381262;ENSP00000381267;ENSP00000391334;ENSP00000396233;ENSP00000412085;ENSP00000413899	E7EPF1;E9PF78;F8WAD8;H7C0Q9;H7C3I4;O75075;O75076;Q9P0K1;Q9P0K2;Q9UIA1;Q9UKK2	ADAM22	Disintegrin and metalloproteinase domain-containing protein 22
-0.486611	-0.62758	-0.458254	-0.542831	-0.0130563	-0.105811	-0.409142	-0.612442	-0.305037	-0.616565	0.100117	-0.196018	-0.797257	-0.868392	-0.288496	-0.50676	0.0754805	-0.168012	cell communication;cell-cell signaling;cellular process;signaling;synaptic transmission	transporter activity	cell part;clathrin-coated vesicle;coated vesicle;cytoplasmic membrane-bounded vesicle;cytoplasmic part;cytoplasmic vesicle;cytoplasmic vesicle membrane;cytoplasmic vesicle part;extracellular membrane-bounded organelle;extracellular organelle;extracellular region part;extracellular vesicular exosome;integral to membrane;integral to organelle membrane;integral to plasma membrane;integral to synapti…		SYPL1	ENSG00000008282	ENSP00000011473;ENSP00000388336;ENSP00000417473;ENSP00000419070	A4D0R2;C9JYN0;H7C4J8;Q16563;Q96AR8	SYPL1	Synaptophysin-like protein 1
-0.329596	0.153636	0.0295181	0.195611	-0.428093	0.139595	0.151164	-0.240119	0.0752017	0.411369	0.028831	-0.0845895	-0.354604	0.0630138	0.0137506	0.136076	-0.301577	0.0942004	cellular metabolic process;cellular process;electron transport chain;establishment of localization;generation of precursor metabolites and energy;metabolic process;oxidation-reduction process;transmembrane transport;transport	binding;catalytic activity;cation binding;ferric-chelate reductase activity;ion binding;metal ion binding;oxidoreductase activity;oxidoreductase activity, oxidizing metal ions;oxidoreductase activity, oxidizing metal ions, NAD or NADP as acceptor;transmembrane electron transfer carrier;transmembrane transporter activity;transporter activity	cell part;integral to membrane;intrinsic to membrane;membrane part		CYB561	ENSG00000008283	ENSP00000354028;ENSP00000376701;ENSP00000376702;ENSP00000400350;ENSP00000442773;ENSP00000462325;ENSP00000462543;ENSP00000462545;ENSP00000463162;ENSP00000463680;ENSP00000464012;ENSP00000464193;ENSP00000464215;ENSP00000464470;ENSP00000464520	B2RE96;B7Z775;D3DU11;F5H757;J3KSL5;J3QKN3;J3QLS0;J3QR25;J3QRF9;J3QRH5;J3QS09;J3QS47;P49447;Q5BJG9;Q9BU05;Q9BWR9	CYB561	Cytochrome b561
-0.74527	-0.612453	-0.325476	-0.60931	-0.241859	-0.0204849	-0.661348	-0.655179	-0.743956	-0.75463	-0.410758	-0.199179	-0.311537	-0.473374	-0.535097	-0.573108	-0.744877	-0.530787	activation of JUN kinase activity;activation of MAPK activity;biological regulation;cell differentiation;cellular component assembly;cellular component organization;cellular component organization or biogenesis;cellular developmental process;cellular macromolecule metabolic process;cellular metabolic process;cellular process;cellular protein metabolic process;developmental process;endosome transp…	binding;binding, bridging;cytoskeletal protein binding;enzyme binding;JUN kinase binding;kinase binding;kinesin binding;MAP-kinase scaffold activity;protein binding;protein complex scaffold;protein kinase binding;receptor signaling complex scaffold activity;signaling adaptor activity;structural molecule activity	acrosomal vesicle;cell part;cytoplasm;cytoplasmic membrane-bounded vesicle;cytoplasmic part;cytoplasmic vesicle;cytosol;extracellular membrane-bounded organelle;extracellular organelle;extracellular region part;extracellular vesicular exosome;integral to membrane;intracellular membrane-bounded organelle;intracellular organelle;intracellular part;intrinsic to membrane;membrane part;membrane-bounde…		SPAG9	ENSG00000008294	ENSP00000262013;ENSP00000349636;ENSP00000423165;ENSP00000423346;ENSP00000426061;ENSP00000426900;ENSP00000429343;ENSP00000430205;ENSP00000484908	A0A087X2D8;A6H8U5;A8MSX0;B4DHH2;D6RHI8;H0Y981;H0YBE9;H0YBS5;O60271;O60905;Q3KQU8;Q3MKM7;Q86WC7;Q86WC8;Q8IZX7;Q96II0;Q9H811	SPAG9	C-Jun-amino-terminal kinase-interacting protein 4
-1.32636	-0.187492	-0.737181	-0.466641	-0.235449	-0.237588	-0.934412	-0.349965	-0.635804	-0.281675	-1.40477	0.263529	-1.11827	-0.492651	-0.0618796	-0.837312	-0.560291	-0.247597	anatomical structure formation involved in morphogenesis;axonal fasciculation;biological adhesion;biological regulation;cell adhesion;cell migration;cell motility;cell projection assembly;cell projection organization;cell recognition;cell surface receptor linked signaling pathway;cell-cell adhesion;cellular component assembly;cellular component assembly at cellular level;cellular component assemb…	binding;calcium ion binding;cation binding;G-protein coupled receptor activity;ion binding;metal ion binding;molecular transducer activity;receptor activity;signal transducer activity;signaling receptor activity;transmembrane signaling receptor activity	cell part;integral to membrane;intrinsic to membrane;membrane;membrane part;plasma membrane		CELSR3	ENSG00000008300	ENSP00000164024	O75092;Q9NYQ7	CELSR3	Cadherin EGF LAG seven-pass G-type receptor 3
-1.27645	-0.978707	-0.751541	-0.65466	-0.645597	-0.0293169	-0.925479	-1.12353	-1.25463	-0.895173	-0.653944	-0.230563	-0.881234	-1.58961	-0.84489	-0.907976	-0.292033	-0.356743	acetyl-CoA metabolic process;amine catabolic process;amine metabolic process;aspartate family amino acid catabolic process;aspartate family amino acid metabolic process;carboxylic acid catabolic process;carboxylic acid metabolic process;catabolic process;cellular amine metabolic process;cellular amino acid catabolic process;cellular amino acid metabolic process;cellular catabolic process;cellular…	catalytic activity;oxidoreductase activity;oxidoreductase activity, acting on the CH-NH group of donors;oxidoreductase activity, acting on the CH-NH group of donors, NAD or NADP as acceptor;saccharopine dehydrogenase (NAD+, L-glutamate-forming) activity;saccharopine dehydrogenase (NADP+, L-lysine-forming) activity;saccharopine dehydrogenase activity	cell part;cytoplasmic part;intracellular membrane-bounded organelle;intracellular organelle;intracellular organelle lumen;intracellular organelle part;intracellular part;membrane-bounded organelle;membrane-enclosed lumen;mitochondrial matrix;mitochondrial part;mitochondrion;organelle;organelle lumen;organelle part	Lysine biosynthesis;Lysine degradation	AASS	ENSG00000008311	ENSP00000351834;ENSP00000377040;ENSP00000394180;ENSP00000403768;ENSP00000414001	F8WAH1;F8WE53;H7C0C6;O95462;Q9UDR5	AASS	Alpha-aminoadipic semialdehyde synthase, mitochondrial;Lysine ketoglutarate reductase;Saccharopine dehydrogenase
0.468008	0.31267	0.079505	0.395082	0.108884	-0.154751	0.256866	0.348459	0.51699	0.230075	0.288417	0.100502	0.20991	0.555825	0.287005	0.535494	0.647331	0.313199					SS18L2	ENSG00000008324	ENSP00000011691;ENSP00000401115	B2R5L1;Q9UHA2	SS18L2	SS18-like protein 2
0.48965	0.35344	0.315572	0.40089	0.0600071	0.246676	0.269121	0.633375	0.234852	0.271225	-0.0750794	0.275734	0.566225	0.533551	0.808136	0.189269	0.359019	0.130348		catalytic activity;hydrolase activity;peptidase activity			MPND	ENSG00000008382	ENSP00000262966;ENSP00000353015;ENSP00000469057;ENSP00000469230;ENSP00000470987;ENSP00000471189;ENSP00000471715;ENSP00000471735	M0QXC4;M0QXK5;M0R044;M0R0F2;M0R189;Q8N594;Q96SJ0;Q9Y2P1;Q9Y2P2;W4VSR2	MPND	MPN domain-containing protein
-0.00245547	-0.248405	-0.153576	-0.295694	-0.0497737	-0.199095	-0.0481412	-0.366737	0.0265396	-0.314608	0.131544	-0.179274	-0.269875	-0.286388	-0.0348105	-0.215493	0.0825167	-0.0873716	amine metabolic process;carboxylic acid metabolic process;cell differentiation;cellular amine metabolic process;cellular amino acid metabolic process;cellular component assembly;cellular component organization;cellular component organization or biogenesis;cellular developmental process;cellular ketone metabolic process;cellular metabolic process;cellular modified amino acid metabolic process;cell…	amine binding;amino acid binding;antioxidant activity;binding;carboxylic acid binding;catalytic activity;glutathione binding;glutathione peroxidase activity;glutathione transferase activity;modified amino acid binding;oxidoreductase activity;oxidoreductase activity, acting on peroxide as acceptor;peptide binding;peroxidase activity;transferase activity;transferase activity, transferring alkyl or …	apical part of cell;cell part;cytoplasmic part;endoplasmic reticulum;endoplasmic reticulum membrane;endoplasmic reticulum part;integral to membrane;intracellular membrane-bounded organelle;intracellular organelle;intracellular organelle part;intracellular part;intrinsic to membrane;membrane;membrane part;membrane-bounded organelle;microbody;microbody membrane;microbody part;mitochondrial inner me…	Drug metabolism - cytochrome P450;Glutathione metabolism;Metabolism of xenobiotics by cytochrome P450	MGST1	ENSG00000008394	ENSP00000010404;ENSP00000379510;ENSP00000379512;ENSP00000379513;ENSP00000437988;ENSP00000438308;ENSP00000440443;ENSP00000442557;ENSP00000442767;ENSP00000442970	A8K533;F5GX73;F5H613;F5H6X2;F5H760;F5H7F6;G5EA53;P10620	MGST1	Microsomal glutathione S-transferase 1
0.135367	-0.40707	-0.343233	0.167608	0.261071	-0.117279	-0.000155687	-0.471074	0.31689	-0.225096	0.113368	0.218663	0.0212293	-0.395272	-0.286018	-0.376997	0.0474491	0.10385	alcohol biosynthetic process;alcohol metabolic process;biological regulation;biosynthetic process;blue light signaling pathway;carbohydrate biosynthetic process;carbohydrate homeostasis;carbohydrate metabolic process;cellular biosynthetic process;cellular carbohydrate biosynthetic process;cellular carbohydrate metabolic process;cellular macromolecule biosynthetic process;cellular macromolecule me…	binding;blue light photoreceptor activity;carbon-carbon lyase activity;catalytic activity;core promoter binding;core promoter sequence-specific DNA binding;DNA binding;DNA photolyase activity;double-stranded DNA binding;enzyme binding;hormone receptor binding;lyase activity;molecular transducer activity;nuclear hormone receptor binding;nucleic acid binding;nucleotide binding;phosphatase binding;p…	cell part;cytoplasmic part;intracellular membrane-bounded organelle;intracellular organelle;intracellular part;membrane-bounded organelle;mitochondrion;nucleus;organelle	Circadian rhythm - mammal	CRY1	ENSG00000008405	ENSP00000008527;ENSP00000447738	H0YHT0;Q16526	CRY1	Cryptochrome-1
0.19691	0.559208	0.2425	0.388936	-0.0387988	0.297362	0.247152	0.569573	0.00633693	0.401131	-0.41685	0.260503	0.499328	0.441296	0.0903583	0.457826	-0.0593538	0.239228	anatomical structure development;astrocyte differentiation;biological regulation;biosynthetic process;cell differentiation;cell differentiation in hindbrain;cellular biosynthetic process;cellular developmental process;cellular macromolecule biosynthetic process;cellular macromolecule metabolic process;cellular metabolic process;cellular nitrogen compound metabolic process;cellular process;central…	binding;DNA binding;nucleic acid binding;nucleic acid binding transcription factor activity;sequence-specific distal enhancer binding RNA polymerase II transcription factor activity;sequence-specific DNA binding RNA polymerase II transcription factor activity;sequence-specific DNA binding transcription factor activity	cell part;intracellular membrane-bounded organelle;intracellular organelle;intracellular organelle part;intracellular part;membrane-bounded organelle;nuclear part;nucleoplasm;nucleus;organelle;organelle part		NFIX	ENSG00000008441	ENSP00000351354;ENSP00000353219;ENSP00000380781;ENSP00000465094;ENSP00000465616;ENSP00000466389;ENSP00000466605;ENSP00000466735;ENSP00000467512;ENSP00000467536;ENSP00000467785;ENSP00000468707;ENSP00000468794	B4DM25;C9JWJ8;K7EJB0;K7EKH0;K7EMQ5;K7EN08;K7EPU2;K7ESG9;O60413;Q0VG09;Q12859;Q13050;Q13052;Q14938;Q5U094;Q9UPH1;Q9Y6R8;X6R5U1	NFIX	Nuclear factor 1;Nuclear factor 1 X-type
-0.854738	-0.258628	-0.395611	-0.441236	-0.422127	0.00623989	-0.613275	-0.460493	-0.547313	-0.445939	-0.309835	-0.00242472	-0.512973	-0.517002	-0.453952	-0.45853	-0.271758	0.00217175	alcohol metabolic process;amine metabolic process;amino sugar metabolic process;aminoglycan biosynthetic process;aminoglycan metabolic process;biosynthetic process;carbohydrate biosynthetic process;carbohydrate metabolic process;carboxylic acid metabolic process;cellular biosynthetic process;cellular carbohydrate metabolic process;cellular ketone metabolic process;cellular macromolecule metabolic…	beta-galactoside alpha-2,3-sialyltransferase activity;catalytic activity;sialyltransferase activity;transferase activity;transferase activity, transferring glycosyl groups	cell part;cytoplasmic part;extracellular membrane-bounded organelle;extracellular organelle;extracellular region part;extracellular vesicular exosome;Golgi apparatus;Golgi apparatus part;Golgi cisterna membrane;Golgi membrane;integral to Golgi membrane;integral to membrane;integral to organelle membrane;intracellular membrane-bounded organelle;intracellular organelle;intracellular organelle part;…	Glycosaminoglycan biosynthesis - keratan sulfate;Glycosphingolipid biosynthesis - ganglio series;Glycosphingolipid biosynthesis - globo series;Mucin type O-Glycan biosynthesis	ST3GAL1	ENSG00000008513	ENSP00000414073;ENSP00000427720;ENSP00000427786;ENSP00000428540;ENSP00000429638;ENSP00000429936;ENSP00000430135;ENSP00000430515	E5RG72;E5RGI3;E5RGL4;E5RH34;E5RHV6;O60677;Q11201;Q9UN51	ST3GAL1	CMP-N-acetylneuraminate-beta-galactosamide-alpha-2,3-sialyltransferase 1
-1.53752	-0.0143433	-0.644626	-0.63719	0.00909662	-0.567821	-1.26893	0.126851	-0.349534	-0.321359	-1.4484	0.24142	-1.03644	-0.215163	-0.376924	0.114661	-0.0262766	0.311338	anatomical structure development;anatomical structure morphogenesis;ascending thin limb development;biological adhesion;biological regulation;blood vessel development;branching morphogenesis of a tube;calcium ion homeostasis;calcium ion transmembrane transport;calcium ion transport;calcium-independent cell-matrix adhesion;cartilage condensation;cartilage development;cation homeostasis;cation tran…	binding;calcium channel activity;carbohydrate binding;cation channel activity;cation transmembrane transporter activity;channel activity;enzyme binding;ion channel activity;ion channel binding;ion transmembrane transporter activity;kinase binding;passive transmembrane transporter activity;protein binding;protein domain specific binding;protein kinase binding;substrate-specific channel activity;su…	basolateral plasma membrane;cell part;cell projection;cell projection membrane;cell projection part;cilium;cilium membrane;cilium part;cytoplasm;cytoplasmic part;cytoplasmic vesicle membrane;cytoplasmic vesicle part;extracellular membrane-bounded organelle;extracellular organelle;extracellular region part;extracellular vesicular exosome;Golgi apparatus part;Golgi membrane;Golgi-associated vesicle…		PKD1	ENSG00000008710	ENSP00000262304;ENSP00000399501;ENSP00000455753;ENSP00000456670;ENSP00000456672;ENSP00000457132;ENSP00000457162;ENSP00000457984;ENSP00000461391	H3BQF4;H3BSE8;H3BSE9;H3BTE0;H3BTG3;H3BV77;I3L4N0;P98161;Q15140;Q15141	PKD1	Polycystin-1
-1.4496	0.5288	1.25851	0.642863	-0.16506	1.13418	0.596102	-0.390154	-0.653727	2.11672	-0.438143	-0.0818863	-1.39725	0.0429623	2.29095	0.83516	0.0786102	1.12468	anatomical structure morphogenesis;behavior;behavioral defense response;behavioral fear response;behavioral interaction between organisms;biological regulation;cell part morphogenesis;cell projection morphogenesis;cell projection organization;cellular chemical homeostasis;cellular component assembly;cellular component assembly at cellular level;cellular component morphogenesis;cellular component …	beta-amyloid binding;binding;binding, bridging;cytoskeletal protein binding;enzyme activator activity;enzyme binding;enzyme regulator activity;kinase activator activity;kinase binding;kinase regulator activity;kinesin binding;MAP-kinase scaffold activity;protein binding;protein complex scaffold;protein kinase activator activity;protein kinase binding;protein kinase regulator activity;signaling ad…	cell body;cell part;cytoplasm;intracellular part;macromolecular complex;neuronal cell body;protein complex	MAPK signaling pathway	MAPK8IP2	ENSG00000008735	ENSP00000330572	Q13387;Q96G62;Q99771;Q9NZ59;Q9UKQ4	MAPK8IP2	C-Jun-amino-terminal kinase-interacting protein 2
0.198142	0.506636	0.252186	-0.0606003	0.0286155	0.582375	0.404756	0.701673	0.178125	0.399101	0.195453	0.195173	0.524925	0.153026	0.451725	0.385523	0.35054	0.677612	androgen receptor signaling pathway;biological regulation;biosynthetic process;cellular biosynthetic process;cellular component assembly;cellular component organization;cellular component organization or biogenesis;cellular macromolecule metabolic process;cellular metabolic process;cellular nitrogen compound metabolic process;cellular process;cellular response to stimulus;developmental process;ge…	acetyltransferase activity;binding;catalytic activity;histone acetyltransferase activity;hormone receptor binding;ligand-dependent nuclear receptor transcription coactivator activity;lysine N-acetyltransferase activity;N-acetyltransferase activity;N-acyltransferase activity;nuclear hormone receptor binding;protein binding;protein binding transcription factor activity;receptor activity;receptor bi…	cell part;intracellular membrane-bounded organelle;intracellular organelle;intracellular organelle part;intracellular part;macromolecular complex;mediator complex;membrane-bounded organelle;nuclear part;nucleoplasm;nucleoplasm part;nucleus;organelle;organelle part;protein complex		MED24	ENSG00000008838	ENSP00000348610;ENSP00000377684;ENSP00000377685;ENSP00000377686;ENSP00000392276;ENSP00000393464;ENSP00000435760;ENSP00000438630;ENSP00000438767;ENSP00000439148;ENSP00000440100;ENSP00000443344;ENSP00000462539;ENSP00000462646;ENSP00000463043;ENSP00000463480;ENSP00000463484;ENSP00000463528;ENSP00000463724;ENSP00000463751;ENSP00000464225;ENSP00000482676	A0A0B4J1W0;A8K4S5;B3KMR9;B4DDR8;B9TX62;B9TX75;E9PFL1;F5GY88;F5H0M2;F5H2D6;F5H3E6;F5H5K2;H0Y4Q9;H0YEG1;J3KSL1;J3KSU0;J3KTL3;J3QLC0;J3QLC2;J3QLF8;J3QLV7;J3QRH9;O75448;Q14143;Q9NNY5	MED24	Mediator of RNA polymerase II transcription subunit 24
0.104922	0.570244	0.549744	0.504062	0.244924	0.270095	0.407899	0.428715	0.469828	0.385862	0.240764	0.321365	0.405441	0.135951	0.141574	0.560618	0.184698	0.450098	biological regulation;cellular process;cellular response to stimulus;intracellular signal transduction;regulation of biological process;regulation of cellular process;regulation of response to stimulus;regulation of signal transduction;regulation of signaling;regulation of small GTPase mediated signal transduction;response to stimulus;signal transduction;small GTPase mediated signal transduction	binding;GTP binding;guanyl nucleotide binding;guanyl ribonucleotide binding;nucleotide binding;purine nucleotide binding;purine ribonucleoside triphosphate binding;purine ribonucleotide binding;ribonucleotide binding	cell part;cytoplasmic part;cytosol;intracellular;intracellular part;membrane;plasma membrane	Ubiquitin mediated proteolysis	RHOBTB2	ENSG00000008853	ENSP00000251822;ENSP00000427926;ENSP00000429141;ENSP00000430785	A8K9Z8;D3DSR8;E5RI44;E9PBU2;E9PEI7;O94825;Q8N4A8;Q9BYZ6;Q9BZK6	RHOBTB2	Rho-related BTB domain-containing protein 2
-1.21827	-1.19852	-0.656801	-0.881734	-0.0862455	0.071661	-0.407626	-0.504682	-0.338853	-0.504003	-0.529116	-0.0292392	-0.530636	-0.48142	-0.51478	-0.803352	-0.209516	-0.279665			cell part;extracellular membrane-bounded organelle;extracellular organelle;extracellular region part;extracellular vesicular exosome;membrane;membrane-bounded organelle;membrane-bounded vesicle;organelle;vesicle		HEATR5B	ENSG00000008869	ENSP00000233099;ENSP00000408222	B5MDU8;H7C2X3;Q7Z3B2;Q9NVL7;Q9P2D3	HEATR5B	HEAT repeat-containing protein 5B
-0.858674	-0.749669	-0.670597	-0.880846	-0.428053	-0.106582	-0.555846	-0.683465	-0.428012	-0.573526	-0.321799	-0.154808	-0.651148	-0.904004	-0.317467	-0.788623	-0.359719	-0.434542	biological regulation;cellular macromolecule metabolic process;cellular metabolic process;cellular process;cellular protein metabolic process;cellular response to chemical stimulus;cellular response to organic substance;cellular response to stimulus;cellular response to stress;cellular response to topologically incorrect protein;cellular response to unfolded protein;cotranslational protein target…	protein transporter activity;receptor activity;substrate-specific transporter activity;transporter activity	aggresome;cell part;cytoplasmic part;cytoskeleton;cytosol;endoplasmic reticulum;endoplasmic reticulum membrane;endoplasmic reticulum part;inclusion body;integral to membrane;intermediate filament cytoskeleton;intracellular membrane-bounded organelle;intracellular non-membrane-bounded organelle;intracellular organelle;intracellular organelle part;intracellular part;intrinsic to membrane;membrane;m…	Protein export;Protein processing in endoplasmic reticulum	SEC62	ENSG00000008952	ENSP00000337688;ENSP00000418342;ENSP00000419319;ENSP00000420304;ENSP00000420331	D3DNQ0;F8WCJ7;F8WDG8;F8WF48;O00682;O00729;Q99442	SEC62	Translocation protein SEC62
0.261376	0.298551	0.159294	0.337054	0.0127664	-0.0410023	0.248988	0.374048	0.235034	0.38598	0.197757	0.0125241	0.146448	0.239895	0.261803	0.290985	0.130774	0.0110075	biosynthetic process;catabolic process;cellular biosynthetic process;cellular catabolic process;cellular component disassembly;cellular component disassembly at cellular level;cellular component organization;cellular component organization at cellular level;cellular component organization or biogenesis;cellular component organization or biogenesis at cellular level;cellular macromolecular complex…	binding;nucleic acid binding;RNA binding;structural constituent of ribosome;structural molecule activity	cell part;cytoplasm;cytoplasmic part;cytosol;cytosolic small ribosomal subunit;extracellular membrane-bounded organelle;extracellular organelle;extracellular region part;extracellular vesicular exosome;intracellular non-membrane-bounded organelle;intracellular organelle;intracellular organelle part;intracellular part;macromolecular complex;membrane;membrane-bounded organelle;membrane-bounded vesi…	Ribosome	RPS20	ENSG00000008988	ENSP00000009589;ENSP00000427788;ENSP00000427860;ENSP00000428104;ENSP00000428146;ENSP00000429049;ENSP00000429333;ENSP00000429374;ENSP00000478703	B2R4F4;B4DW28;E5RIP1;E5RJX2;G3XAN0;P17075;P60866;Q5M8S9	RPS20	40S ribosomal protein S20
0.257669	-0.05583	0.174591	-0.0310392	0.224787	0.173892	0.177355	-0.0239875	0.197639	-0.0750973	0.259799	0.0798144	0.340956	0.109088	0.252895	0.0829325	0.110919	-0.0655515	anatomical structure development;biological regulation;catabolic process;cellular catabolic process;cellular macromolecule catabolic process;cellular macromolecule metabolic process;cellular metabolic process;cellular nitrogen compound metabolic process;cellular process;developmental process;developmental process involved in reproduction;gonad development;macromolecule catabolic process;macromole…	binding;DNA binding;nucleic acid binding	cell part;CRD-mediated mRNA stability complex;cytoplasm;cytoplasmic part;Golgi apparatus;intracellular membrane-bounded organelle;intracellular organelle;intracellular organelle part;intracellular part;macromolecular complex;membrane;membrane-bounded organelle;mitochondrial inner membrane;mitochondrial membrane;mitochondrial part;organelle;organelle inner membrane;organelle membrane;organelle par…		CSDE1	ENSG00000009307	ENSP00000261443;ENSP00000342408;ENSP00000351329;ENSP00000358543;ENSP00000407724;ENSP00000431297;ENSP00000431562;ENSP00000431770;ENSP00000432958;ENSP00000435185;ENSP00000437159;ENSP00000481762	A8K281;E9PGZ0;E9PJK7;E9PKN4;E9PLD4;E9PLT0;E9PNG3;G5E9Q2;O75534;O94961;Q5TF04;Q5TF05;Q68DF1;Q68DI9;Q9Y2S4	CSDE1	Cold shock domain-containing protein E1
0.0205424	-0.175096	0.0223894	0.0202227	0.0963931	0.049159	-0.0267713	-0.0491998	-0.154577	0.12416	0.02807	0.086184	0.0160117	-0.0883601	-0.000346661	-0.0104456	-0.0471125	-0.260689	cellular macromolecule metabolic process;cellular metabolic process;cellular process;cellular protein metabolic process;macromolecule metabolic process;macromolecule modification;metabolic process;primary metabolic process;protein metabolic process;protein modification by small protein conjugation;protein modification by small protein conjugation or removal;protein modification process;protein po…	acid-amino acid ligase activity;catalytic activity;ligase activity;ligase activity, forming carbon-nitrogen bonds;small conjugating protein ligase activity;ubiquitin-protein ligase activity	cell part;cytoplasm;intracellular;intracellular membrane-bounded organelle;intracellular organelle;intracellular part;macromolecular complex;membrane-bounded organelle;nucleus;organelle;proteasome complex;protein complex	Ubiquitin mediated proteolysis	UBE3C	ENSG00000009335	ENSP00000309198;ENSP00000373755;ENSP00000397432;ENSP00000481584	A4D235;A6NCP3;H7C0Y1;Q15386;Q8TC15;Q96CR4;Q9UDU3	UBE3C	Ubiquitin-protein ligase E3C
-0.610316	-0.363365	-0.381433	-0.25618	-0.107857	0.0117149	-0.255901	-0.365551	-0.0778906	-0.333842	-0.148635	-0.15452	-0.52366	-0.33354	-0.124471	-0.0890045	-0.395596	-0.331653	biosynthetic process;cellular biosynthetic process;cellular macromolecule biosynthetic process;cellular macromolecule metabolic process;cellular metabolic process;cellular nitrogen compound metabolic process;cellular process;cellular response to stimulus;cellular response to stress;DNA biosynthetic process;DNA metabolic process;DNA repair;DNA replication;DNA-dependent DNA replication;error-prone …	3'-5' exonuclease activity;4 iron, 4 sulfur cluster binding;binding;catalytic activity;cation binding;DNA binding;DNA polymerase activity;DNA-directed DNA polymerase activity;exonuclease activity;hydrolase activity;hydrolase activity, acting on ester bonds;ion binding;iron-sulfur cluster binding;metal cluster binding;metal ion binding;nuclease activity;nucleic acid binding;nucleotide binding;nucl…	cell part;DNA polymerase complex;intracellular membrane-bounded organelle;intracellular non-membrane-bounded organelle;intracellular organelle;intracellular organelle part;intracellular part;macromolecular complex;membrane-bounded organelle;non-membrane-bounded organelle;nuclear part;nucleolus;nucleoplasm;nucleus;organelle;organelle part;protein complex;zeta DNA polymerase complex		REV3L	ENSG00000009413	ENSP00000351697;ENSP00000357792;ENSP00000357795;ENSP00000391605;ENSP00000393184;ENSP00000400600;ENSP00000402003;ENSP00000482892	A0A087WZU4;F2Z3A1;H0Y5T4;O43214;O60673;Q5TC33	REV3L	DNA polymerase zeta catalytic subunit
0.113736	0.211958	0.234264	-0.0656891	0.0266209	-0.0791554	-0.193247	0.413163	-0.0480797	0.0478933	0.236989	0.016027	-0.139637	0.213266	-0.0374589	0.283869	0.145966	-0.236154					FAM76A	ENSG00000009780	ENSP00000010299;ENSP00000234549;ENSP00000363060;ENSP00000363065;ENSP00000393171;ENSP00000395150;ENSP00000436176	B1AJQ5;B4DWT3;E9PQL1;O95565;O95566;Q8N7J5;Q8TAV0	FAM76A	Protein FAM76A
-0.750422	-0.167194	-0.265182	-0.711444	-0.162652	0.424821	-0.598395	-0.287919	-0.715566	-0.132069	-0.515818	-0.0841937	-0.379882	-0.699469	-0.364529	-0.507404	-0.307519	0.229425	carbohydrate metabolic process;cellular carbohydrate metabolic process;cellular macromolecule metabolic process;cellular metabolic process;cellular process;cellular protein metabolic process;glycosylation;macromolecule glycosylation;macromolecule metabolic process;macromolecule modification;metabolic process;primary metabolic process;protein glycosylation;protein metabolic process;protein modific…	binding;catalytic activity;cation binding;dolichyl-phosphate-mannose-protein mannosyltransferase activity;ion binding;mannosyltransferase activity;metal ion binding;transferase activity;transferase activity, transferring glycosyl groups;transferase activity, transferring hexosyl groups	cell part;cytoplasmic part;endoplasmic reticulum membrane;endoplasmic reticulum part;integral to membrane;intracellular organelle part;intracellular part;intrinsic to membrane;membrane;membrane part;organelle membrane;organelle part	Other types of O-glycan biosynthesis	POMT2	ENSG00000009830	ENSP00000261534;ENSP00000450630;ENSP00000451115;ENSP00000451651;ENSP00000451730;ENSP00000451967;ENSP00000452060	G3V4X9;H0YJA9;H0YJJ4;H0YJK9;H0YJQ7;Q9NSG6;Q9P1W0;Q9P1W2;Q9UKY4	POMT2	Protein O-mannosyl-transferase 2
0.565539	0.378006	-0.00363445	-0.184669	0.385658	0.027267	0.315712	-0.0459354	0.485465	0.153158	0.335727	0.160168	0.194758	0.307175	0.22633	0.464375	0.612792	-0.114067	cellular component organization;cellular component organization or biogenesis;cellular process;endosome transport;establishment of localization;establishment of localization in cell;establishment of protein localization;intracellular transport;membrane organization;multivesicular body sorting pathway;non-lytic viral release;non-lytic virus budding;protein transport;release of virus from host;repr…	binding;protein binding;protein C-terminus binding	cell part;cytoplasmic part;cytosol;endosomal part;endosome membrane;extracellular membrane-bounded organelle;extracellular organelle;extracellular region part;extracellular vesicular exosome;intracellular organelle part;intracellular part;membrane;membrane-bounded organelle;membrane-bounded vesicle;organelle;organelle membrane;organelle part;vesicle	Endocytosis	VTA1	ENSG00000009844	ENSP00000356593;ENSP00000356602;ENSP00000395767;ENSP00000481525	A0A087WY55;B4DW55;E1P594;E7ETQ7;Q5TGM0;Q5TGM1;Q6IAE8;Q9H0R2;Q9H3K9;Q9NP79;Q9P0Q0	VTA1	Vacuolar protein sorting-associated protein VTA1 homolog
-1.03456	-0.804625	-0.70352	0.549754	-0.177032	1.95618	-0.305249	-0.181567	0.0832388	-0.425955	-1.83407	1.03676	0.359774	-0.483107	-1.33465	-1.37095	2.81558	1.79984	anatomical structure morphogenesis;biological regulation;biosynthetic process;carbohydrate homeostasis;carbohydrate mediated signaling;cellular biosynthetic process;cellular chemical homeostasis;cellular glucose homeostasis;cellular homeostasis;cellular macromolecule biosynthetic process;cellular macromolecule metabolic process;cellular metabolic process;cellular nitrogen compound metabolic proce…	binding;carbohydrate response element binding;DNA binding;nucleic acid binding;nucleic acid binding transcription factor activity;protein binding;protein dimerization activity;protein heterodimerization activity;regulatory region DNA binding;regulatory region nucleic acid binding;sequence-specific DNA binding transcription factor activity;transcription factor binding;transcription regulatory regi…	cell part;cytoplasm;cytoplasmic part;cytosol;intracellular membrane-bounded organelle;intracellular organelle;intracellular organelle part;intracellular part;macromolecular complex;membrane-bounded organelle;nuclear part;nucleoplasm;nucleoplasm part;nucleus;organelle;organelle part;protein complex;transcription factor complex		MLXIPL	ENSG00000009950	ENSP00000320886;ENSP00000343767;ENSP00000346629;ENSP00000392636;ENSP00000395172;ENSP00000402615;ENSP00000406296;ENSP00000412330	A0A0C4DG26;C5HU02;C5HU03;C5HU04;C9JDF5;H7C1V3;Q96E48;Q9BY03;Q9BY04;Q9BY05;Q9BY06;Q9NP71;Q9Y2P3	MLXIPL	Carbohydrate-responsive element-binding protein
-0.0221374	0.168873	0.0925484	-0.0873852	0.0549674	0.16302	0.229338	0.202652	-0.135543	0.0325019	-0.172646	0.0804143	0.472249	0.303519	-0.0556378	0.104193	-0.320181	-0.324648	anatomical structure morphogenesis;biological regulation;biosynthetic process;cellular biosynthetic process;cellular component organization;cellular component organization at cellular level;cellular component organization or biogenesis;cellular component organization or biogenesis at cellular level;cellular macromolecule biosynthetic process;cellular macromolecule metabolic process;cellular metab…	acetylcholine receptor regulator activity;adenyl nucleotide binding;adenyl ribonucleotide binding;ATP binding;binding;catalytic activity;cation binding;chromatin binding;histone acetyl-lysine binding;histone binding;histone kinase activity;ion binding;kinase activity;metal ion binding;non-membrane spanning protein tyrosine kinase activity;nucleotide binding;phosphotransferase activity, alcohol gr…	cell part;centromeric heterochromatin;chromatin;chromosomal part;chromosome;condensed chromosome;heterochromatin;intracellular membrane-bounded organelle;intracellular non-membrane-bounded organelle;intracellular organelle;intracellular organelle part;intracellular part;membrane-bounded organelle;non-membrane-bounded organelle;nucleus;organelle;organelle part		BAZ1B	ENSG00000009954	ENSP00000342434;ENSP00000385442	B9EGK3;D3DXE9;O95039;O95247;O95277;Q6P1K4;Q86UJ6;Q9UIG0	BAZ1B	Tyrosine-protein kinase BAZ1B
-0.432917	-0.0258389	0.189844	-0.0770288	-0.16898	-0.2326	0.0888574	-0.112571	0.300759	0.16662	-0.0211568	0.0488315	0.293731	-0.323764	-0.228231	0.170426	0.15261	0.285091	axon guidance;biological regulation;cellular component assembly;cellular component organization;cellular component organization at cellular level;cellular component organization or biogenesis;cellular component organization or biogenesis at cellular level;cellular process;chemotaxis;cytoskeleton organization;locomotion;macromolecular complex assembly;macromolecular complex subunit organization;mi…	binding;enzyme binding;GTPase binding;protein binding;Ran GTPase binding;Ras GTPase binding;small GTPase binding	cell part;cytoplasmic part;cytoskeletal part;cytosol;intracellular membrane-bounded organelle;intracellular organelle;intracellular organelle part;intracellular part;macromolecular complex;membrane-bounded organelle;microtubule associated complex;nucleus;organelle;organelle part;protein complex		RANBP9	ENSG00000010017	ENSP00000011619	A0PJA2;B2R8E1;O94764;Q6P3T7;Q7LBR2;Q7Z7F9;Q96S59	RANBP9	Ran-binding protein 9
0.282471	-0.115664	0.201876	-0.247083	-0.230862	-0.179593	-0.238822	-0.266063	0.121758	-0.247024	0.0376916	-0.282614	0.0749769	-0.405184	-0.519116	0.218644	-0.227864	-0.196749	biological regulation;biosynthetic process;cellular biosynthetic process;cellular macromolecule biosynthetic process;cellular macromolecule metabolic process;cellular metabolic process;cellular nitrogen compound metabolic process;cellular process;cellular response to stimulus;cellular response to stress;DNA biosynthetic process;DNA metabolic process;DNA repair;error-free translesion synthesis;mac…	binding;cation binding;DNA binding;ion binding;K63-linked polyubiquitin binding;metal ion binding;nucleic acid binding;polyubiquitin binding;protein binding;small conjugating protein binding;ubiquitin binding	cell part;chromosome;intracellular membrane-bounded organelle;intracellular non-membrane-bounded organelle;intracellular organelle;intracellular organelle part;intracellular part;membrane-bounded organelle;non-membrane-bounded organelle;nuclear body;nuclear part;nuclear speck;nucleoplasm;nucleoplasm part;nucleus;organelle;organelle part		SPRTN	ENSG00000010072	ENSP00000008440;ENSP00000295050;ENSP00000355604;ENSP00000375731	B1AKT0;B1AKT1;B5MEF7;Q5TE78;Q6UWW6;Q96BC5;Q96KA0;Q9H040	SPRTN	SprT-like domain-containing protein Spartan
0.13132	-0.0633588	-0.0786772	0.210952	0.0288463	0.0830326	0.187007	0.147297	-0.27933	0.154795	-0.226147	0.00879717	-0.0429845	0.243874	0.180578	0.0137167	0.129997	-0.00380969		catalytic activity;methyltransferase activity;transferase activity;transferase activity, transferring one-carbon groups			METTL13	ENSG00000010165	ENSP00000354920;ENSP00000355393;ENSP00000356711	A6NFK0;A8K6S5;O94940;Q53EZ6;Q5TGP9;Q5TGQ0;Q8N2P8;Q8N6R0;Q96J11;Q96SQ0;Q9Y2Z1;Q9Y3M6	METTL13	Methyltransferase-like protein 13
0.242282	-0.0122204	0.384014	0.379828	0.167657	-0.22	0.375802	0.752349	0.144451	0.413366	-0.015738	-0.103077	0.0851521	0.313407	0.167469	0.40666	0.279142	-0.216205		adenyl nucleotide binding;adenyl ribonucleotide binding;ATP binding;binding;catalytic activity;cation binding;ion binding;kinase activity;metal ion binding;nucleotide binding;phosphotransferase activity, alcohol group as acceptor;protein kinase activity;protein serine/threonine kinase activity;protein serine/threonine/tyrosine kinase activity;protein tyrosine kinase activity;purine nucleotide bin…	cell part;cytoplasm;intracellular membrane-bounded organelle;intracellular organelle;intracellular part;membrane-bounded organelle;nucleus;organelle		DYRK4	ENSG00000010219	ENSP00000010132;ENSP00000438769;ENSP00000439168;ENSP00000439697;ENSP00000441755;ENSP00000441996;ENSP00000444842	A0A0A0MTH5;A8K8F7;F5GWS4;F5H3D3;F5H4X6;H0YFI4;Q8NEF2;Q92631;Q9NR20	DYRK4	Dual specificity tyrosine-phosphorylation-regulated kinase 4
-0.193168	-0.41197	-0.235765	-0.196287	-0.232521	-0.293715	-0.270508	-0.479791	-0.262293	-0.248451	-0.128244	-0.147796	-0.443637	-0.496913	-0.1293	-0.338888	-0.15707	-0.253893	attachment of spindle microtubules to chromosome;attachment of spindle microtubules to kinetochore;biological regulation;cell cycle checkpoint;cell cycle process;cell division;cellular component organization;cellular component organization at cellular level;cellular component organization or biogenesis;cellular component organization or biogenesis at cellular level;cellular process;chromosome org…	binding;carbohydrate binding;cation binding;cytoskeletal protein binding;DNA binding;glycosaminoglycan binding;heparin binding;ion binding;metal ion binding;microtubule binding;nucleic acid binding;nucleic acid binding transcription factor activity;pattern binding;polysaccharide binding;protein binding;sequence-specific DNA binding transcription factor activity;transition metal ion binding;tubuli…	cell part;chromosomal part;condensed chromosome kinetochore;cytoskeletal part;intracellular membrane-bounded organelle;intracellular non-membrane-bounded organelle;intracellular organelle;intracellular organelle part;intracellular part;kinetochore;macromolecular complex;membrane-bounded organelle;microtubule;non-membrane-bounded organelle;nuclear part;nucleolus;nucleus;organelle;organelle part;pr…		ZNF207	ENSG00000010244	ENSP00000322777;ENSP00000340029;ENSP00000378165;ENSP00000378168;ENSP00000378172;ENSP00000461914;ENSP00000462193;ENSP00000462284;ENSP00000463040;ENSP00000464366;ENSP00000464495	A8K6Y6;E1P660;E1P661;E1P662;H0Y3M2;J3KRB6;J3KRW6;J3KS31;J3KTL1;J3QRS9;J3QS27;O43670;Q53XS9;Q96HW5;Q9BUQ7;X6R4W8	ZNF207	BUB3-interacting and GLEBS motif-containing protein ZNF207
0.339856	0.248846	0.0118389	0.148977	0.00996923	0.144819	0.029238	0.202264	0.230536	0.333783	0.16473	0.121509	0.159115	0.212174	0.103605	0.149803	0.345313	0.115346	aerobic respiration;cellular metabolic process;cellular process;cellular respiration;electron transport chain;energy derivation by oxidation of organic compounds;generation of precursor metabolites and energy;metabolic process;mitochondrial electron transport, ubiquinol to cytochrome c;oxidation-reduction process;oxidative phosphorylation;phosphate-containing compound metabolic process;phosphorus…	binding;catalytic activity;cation binding;cation transmembrane transporter activity;enzyme binding;hydrogen ion transmembrane transporter activity;inorganic cation transmembrane transporter activity;ion binding;ion transmembrane transporter activity;metal ion binding;monovalent inorganic cation transmembrane transporter activity;oxidoreductase activity;oxidoreductase activity, acting on diphenols…	cell part;cytoplasmic part;intracellular membrane-bounded organelle;intracellular organelle;intracellular organelle part;intracellular part;macromolecular complex;membrane;membrane part;membrane-bounded organelle;mitochondrial inner membrane;mitochondrial membrane;mitochondrial membrane part;mitochondrial part;mitochondrial respiratory chain;mitochondrial respiratory chain complex III;mitochondri…	Alzheimer's disease;Cardiac muscle contraction;Huntington's disease;Oxidative phosphorylation;Parkinson's disease	UQCRC1	ENSG00000010256	ENSP00000203407;ENSP00000388660;ENSP00000393696	B2R7R8;F8WEF1;F8WER5;P31930;Q96DD2	UQCRC1	Cytochrome b-c1 complex subunit 1, mitochondrial
0.184207	-0.07096	0.141523	0.0896826	0.131952	-0.261047	-0.229869	-0.107181	0.175944	-0.24814	0.260615	0.250243	-0.357762	-0.0907233	-0.0174432	0.0420914	0.121337	0.19696			cell part;cytoplasmic part;endosomal part;endosome membrane;integral to membrane;intracellular membrane-bounded organelle;intracellular organelle;intracellular organelle part;intracellular part;intrinsic to membrane;late endosome membrane;lysosomal membrane;membrane;membrane part;membrane-bounded organelle;organelle;organelle membrane;organelle part;vacuolar membrane;vacuolar part		STARD3NL	ENSG00000010270	ENSP00000009041;ENSP00000379334;ENSP00000394000;ENSP00000395455;ENSP00000402028;ENSP00000411933	A4D1X0;C9J3F5;C9JJ39;C9JKL2;C9JPX5;O95772	STARD3NL	MLN64 N-terminal domain homolog
-0.959358	-1.16021	-0.712087	-1.30339	-0.0879989	-0.269085	-1.16254	-1.0727	-0.468808	-1.22216	-0.184848	-0.315728	-1.16551	-0.958677	-0.665954	-1.11996	-0.237051	-0.00457835	anatomical structure development;anatomical structure formation involved in morphogenesis;biological adhesion;biological regulation;blood coagulation;brain development;cell activation;cell adhesion;cell development;cell junction assembly;cell junction organization;cell-cell junction assembly;cell-cell junction organization;cellular component assembly;cellular component assembly at cellular level;…		adherens junction;anchoring junction;apical plasma membrane;cell junction;cell part;cell-substrate adherens junction;cell-substrate junction;clathrin coated vesicle membrane;clathrin-coated endocytic vesicle membrane;coated vesicle membrane;cytoplasmic part;cytoplasmic vesicle membrane;cytoplasmic vesicle part;endocytic vesicle membrane;external side of plasma membrane;extracellular membrane-boun…	Hematopoietic cell lineage	CD9	ENSG00000010278	ENSP00000009180;ENSP00000371955;ENSP00000371958;ENSP00000371959;ENSP00000440985;ENSP00000478288;ENSP00000482643	A0A087WU13;A0A087WZG3;A6NNI4;D3DUQ9;F5GXT1;G8JLH6;P21926;Q5J7W6;Q96ES4	CD9	CD9 antigen;Tetraspanin
-0.0583646	-0.251934	-0.225054	-0.0919952	-0.186886	-0.267767	-0.294212	-0.472546	-0.0579026	-0.403785	-0.190288	-0.126485	-0.416687	-0.202998	-0.286024	-0.359629	-0.288576	0.115668	cell cycle;cell cycle process;cell division;cellular component organization;cellular component organization at cellular level;cellular component organization or biogenesis;cellular component organization or biogenesis at cellular level;cellular macromolecule metabolic process;cellular metabolic process;cellular nitrogen compound metabolic process;cellular process;chromosome condensation;chromosom…	binding;histone binding;protein binding	cell part;chromosomal part;chromosome;condensed chromosome;condensin complex;condensin core heterodimer;cytoplasm;cytoplasmic part;cytosol;intracellular membrane-bounded organelle;intracellular non-membrane-bounded organelle;intracellular organelle;intracellular organelle part;intracellular part;macromolecular complex;membrane;membrane-bounded organelle;non-membrane-bounded organelle;nuclear part…	Cell cycle - yeast	NCAPD2	ENSG00000010292	ENSP00000325017;ENSP00000371895;ENSP00000438495;ENSP00000444377	D3DUR4;E7EN77;F5GZK7;F5H431;Q15021;Q8N6U3	NCAPD2	Condensin complex subunit 1
-0.241197	0.0229087	-0.147606	-0.53346	-0.259494	-0.172434	-0.175617	-0.0278523	-0.487593	0.0891116	-0.234609	0.0766883	-0.677121	-0.805035	0.0618649	-0.507553	-0.452913	0.294735			cell part;cytoskeletal part;intermediate filament;intracellular organelle part;intracellular part;macromolecular complex;organelle part;protein complex		IFFO1	ENSG00000010295	ENSP00000337593;ENSP00000349364;ENSP00000380052;ENSP00000390721;ENSP00000432493;ENSP00000436261;ENSP00000482285;ENSP00000482340	A0A087WZ16;E9PPX7;F8W8H2;Q0D2I5;Q24JT6;Q7L5J9;Q7Z5X4;Q9BQ46	IFFO1	Intermediate filament family orphan 1
0.0573642	0.73525	0.791944	0.248584	-0.78799	0.850389	-0.474981	-0.0116422	0.286331	-0.850453	0.599502	-0.169692	0.334899	0.358464	0.268926	0.0726595	-0.1488	0.381992		binding;cation binding;ion binding;metal ion binding;transition metal ion binding;zinc ion binding	cell part;cytoplasmic part;cytoskeletal part;intracellular membrane-bounded organelle;intracellular organelle;intracellular organelle part;intracellular part;membrane-bounded organelle;microtubule organizing center;nuclear part;nucleoplasm;nucleus;organelle;organelle part		PHF7	ENSG00000010318	ENSP00000246282;ENSP00000333024;ENSP00000417712;ENSP00000420521;ENSP00000478693;ENSP00000480003;ENSP00000483724	A0A087WUI3;A0A087X0X8;H7C4N0;H7C5Q8;K4DI82;Q9BWX1	PHF7	PHD finger protein 7
-0.401662	0.493176	-0.266425	0.25815	0.240579	0.158227	-0.547389	-0.0403535	-0.525402	0.178116	-0.551672	-0.275744	-0.303714	-0.276904	-0.0480313	-0.22177	-0.000560284	0.110809	actin cytoskeleton organization;actin filament-based process;alcohol metabolic process;amine transport;apoptosis;biological regulation;carbohydrate metabolic process;catecholamine secretion;catecholamine transport;cell death;cellular carbohydrate metabolic process;cellular component organization;cellular component organization at cellular level;cellular component organization or biogenesis;cellul…	binding;G-protein coupled amine receptor activity;G-protein coupled receptor activity;identical protein binding;lipid binding;molecular transducer activity;phosphatidylinositol binding;phospholipid binding;protein binding;receptor activity;signal transducer activity;signaling receptor activity;transmembrane signaling receptor activity	cell part;cytoplasmic part;cytosol;early endosome;endosome;intracellular membrane-bounded organelle;intracellular organelle;intracellular part;membrane;membrane-bounded organelle;organelle;plasma membrane;recycling endosome		NISCH	ENSG00000010322	ENSP00000339958;ENSP00000392484;ENSP00000417812;ENSP00000418232	C9J245;C9J715;Q6PGP3;Q6PIB4;Q7L8M3;Q7Z2X6;Q9UES6;Q9UEU4;Q9UFW3;Q9Y2I1	NISCH	Nischarin
0.526557	0.0267982	-0.26409	0.0892386	0.180037	0.00865126	0.200517	-0.210546	0.681622	0.31718	0.509358	-0.18975	0.56042	0.717386	0.238905	0.364062	1.02788	0.0359118	anatomical structure development;anatomical structure formation involved in morphogenesis;anatomical structure morphogenesis;biological regulation;body morphogenesis;cell projection assembly;cell projection organization;cellular component assembly;cellular component assembly at cellular level;cellular component assembly involved in morphogenesis;cellular component organization;cellular component …		cell part;cytoplasm;cytoskeleton;extracellular membrane-bounded organelle;extracellular organelle;extracellular region part;extracellular vesicular exosome;intracellular non-membrane-bounded organelle;intracellular organelle;intracellular part;membrane-bounded organelle;membrane-bounded vesicle;non-membrane-bounded organelle;organelle;vesicle		FUZ	ENSG00000010361	ENSP00000313309;ENSP00000366296;ENSP00000431388;ENSP00000431420;ENSP00000431731;ENSP00000432148;ENSP00000433164;ENSP00000433492;ENSP00000435177;ENSP00000469856;ENSP00000470155;ENSP00000470863;ENSP00000471319;ENSP00000471793	B2RD86;B5MDH0;E9PK12;E9PKJ4;E9PLA3;E9PS25;G5E9A4;M0QYI7;M0QYX9;M0QZY8;M0R0M0;M0R1D4;Q6PJY0;Q9BT04;Q9H613	FUZ	Protein fuzzy homolog
-0.781909	-0.646362	-0.50493	-0.702353	-0.370342	-0.0713692	-0.474909	-0.553961	-0.429436	-0.411899	-0.573543	-0.23591	-0.419384	-0.720146	-0.782112	-0.804369	-0.290813	-0.408748	amine metabolic process;aminoglycan catabolic process;aminoglycan metabolic process;carbohydrate catabolic process;carbohydrate metabolic process;catabolic process;cellular catabolic process;cellular metabolic process;cellular process;chondroitin sulfate catabolic process;chondroitin sulfate metabolic process;glycosaminoglycan catabolic process;glycosaminoglycan metabolic process;macromolecule ca…	binding;catalytic activity;cation binding;hydrolase activity;hydrolase activity, acting on ester bonds;iduronate-2-sulfatase activity;ion binding;metal ion binding;sulfuric ester hydrolase activity	cell part;cytoplasmic part;intracellular organelle lumen;intracellular organelle part;intracellular part;lysosomal lumen;membrane-enclosed lumen;organelle lumen;organelle part;vacuolar lumen;vacuolar part	Glycosaminoglycan degradation;Lysosome	IDS	ENSG00000010404	ENSP00000339801;ENSP00000359470;ENSP00000390241;ENSP00000418264;ENSP00000428980;ENSP00000429745	D3DWT4;E5RHJ1;H0YB91;O60597;P22304;Q14604;Q9BRM3	IDS	Iduronate 2-sulfatase;Iduronate 2-sulfatase 14 kDa chain;Iduronate 2-sulfatase 42 kDa chain
0.577783	0.381242	0.0994549	0.155313	0.0451283	-0.519845	0.0502532	0.483123	0.377212	-0.396505	0.158	0.444417	0.264717	0.654396	0.167487	0.221105	0.351876	0.504389	cell migration;cell motility;cellular component movement;cellular metabolic process;cellular process;cobalamin metabolic process;cofactor metabolic process;defense response;digestion;endothelial cell migration;heterocycle metabolic process;immune response;immune system process;innate immune response;locomotion;macromolecule metabolic process;metabolic process;multicellular organismal process;nitr…	binding;calcium ion binding;catalytic activity;cation binding;endopeptidase activity;hydrolase activity;ion binding;metal ion binding;peptidase activity;peptidase activity, acting on L-amino acid peptides;serine hydrolase activity;serine-type endopeptidase activity;serine-type peptidase activity	extracellular membrane-bounded organelle;extracellular organelle;extracellular region;extracellular region part;extracellular space;extracellular vesicular exosome;membrane-bounded organelle;membrane-bounded vesicle;organelle;vesicle	Neuroactive ligand-receptor interaction;Pancreatic secretion;Protein digestion and absorption	PRSS3	ENSG00000010438	ENSP00000340889;ENSP00000354280;ENSP00000368715;ENSP00000401249;ENSP00000401828	A8CED1;A8CED3;A9Z1Y4;B1AN99;E7ES07;F8W7P3;P15951;P35030;Q15665;Q5VXV0;Q6ISJ4;Q9UQV3	PRSS3	Trypsin-3
-0.364707	-0.186748	-0.0151172	-0.284568	0.0193648	-0.411187	0.10623	0.192716	-0.488667	0.261532	-0.0787272	-0.83846	-0.217283	0.0675862	-0.0533829	0.00700808	0.164725	-0.0344775	biological regulation;biosynthetic process;cellular biosynthetic process;cellular macromolecule biosynthetic process;cellular macromolecule metabolic process;cellular metabolic process;cellular nitrogen compound metabolic process;cellular process;macromolecule biosynthetic process;macromolecule metabolic process;metabolic process;nitrogen compound metabolic process;nucleic acid metabolic process;…	binding;cation binding;ion binding;metal ion binding;nucleic acid binding	cell part;intracellular membrane-bounded organelle;intracellular organelle;intracellular part;membrane-bounded organelle;nucleus;organelle		ZNF200	ENSG00000010539	ENSP00000380077;ENSP00000380079;ENSP00000380080;ENSP00000395723;ENSP00000405786;ENSP00000458508;ENSP00000458777	D3DUB7;D3DUB8;I3L1E4;O15361;P98182;Q5XKM5;Q7Z5V1	ZNF200	Zinc finger protein 200
0.427547	0.210723	0.0854154	0.413148	0.0336189	0.363486	0.500636	0.290745	0.463843	0.635991	0.195075	-0.00289774	0.348994	0.366077	0.679994	0.506037	0.269294	0.650618					LRRC23	ENSG00000010626	ENSP00000007969;ENSP00000317464;ENSP00000390932;ENSP00000392623;ENSP00000394566;ENSP00000396049;ENSP00000397192;ENSP00000402554;ENSP00000408066;ENSP00000412744;ENSP00000479128	A8K8C6;C9JEW3;C9JKE8;C9JQN5;D3DUT1;E9PDZ4;F2Z299;Q53EV4;Q8N6K6;Q92977;Q99620	LRRC23	Leucine-rich repeat-containing protein 23
-0.579656	-0.433657	-0.358407	-0.542169	-0.460104	-0.0195689	-0.436119	-0.738077	-0.418098	-1.21997	0.0389557	-0.146352	-0.306314	-0.852788	-0.802157	-0.835582	-0.327029	-0.133042	antigen processing and presentation;antigen processing and presentation of peptide antigen;antigen processing and presentation of peptide antigen via MHC class I;biological regulation;biosynthetic process;BMP signaling pathway;cation homeostasis;cell communication;cell surface receptor linked signaling pathway;cellular cation homeostasis;cellular chemical homeostasis;cellular component assembly;c…	antigen binding;binding;peptide antigen binding;peptide binding;protein binding;receptor binding	apical part of cell;basal part of cell;cell part;cytoplasmic part;cytoplasmic vesicle;early endosome;endosome;external side of plasma membrane;integral to membrane;integral to plasma membrane;intracellular membrane-bounded organelle;intracellular organelle;intracellular part;intrinsic to membrane;intrinsic to plasma membrane;macromolecular complex;membrane;membrane part;membrane-bounded organelle…		HFE	ENSG00000010704	ENSP00000259699;ENSP00000311698;ENSP00000312342;ENSP00000313776;ENSP00000315936;ENSP00000337819;ENSP00000380217;ENSP00000417404;ENSP00000417534;ENSP00000419725;ENSP00000420559;ENSP00000420802	B2CKL0;F8W7W8;H7C4K4;O75929;O75930;O75931;Q17RT0;Q30201;Q6B0J5;Q96KU5;Q96KU6;Q96KU7;Q96KU8;Q9HC64;Q9HC68;Q9HC70;Q9HC83	HFE	Hereditary hemochromatosis protein
-0.299943	0.528799	-0.0482216	0.294414	0.162779	0.0358725	0.279543	-0.0116422	-0.463043	0.159651	0.154731	-0.093936	0.125652	0.0616987	0.0064373	0.0505991	0.238267	0.50036	anatomical structure morphogenesis;anterior/posterior pattern specification;biological regulation;biosynthetic process;cellular biosynthetic process;cellular component organization;cellular component organization at cellular level;cellular component organization or biogenesis;cellular component organization or biogenesis at cellular level;cellular macromolecule biosynthetic process;cellular macro…	binding;DNA binding;nucleic acid binding;nucleic acid binding transcription factor activity;sequence-specific DNA binding transcription factor activity	cell part;chromocenter;chromosomal part;intracellular membrane-bounded organelle;intracellular organelle;intracellular organelle part;intracellular part;membrane-bounded organelle;nuclear part;nucleoplasm;nucleus;organelle;organelle part		SCMH1	ENSG00000010803	ENSP00000318094;ENSP00000337352;ENSP00000354656;ENSP00000354996;ENSP00000361676;ENSP00000361677;ENSP00000361678;ENSP00000380356;ENSP00000380359;ENSP00000386079;ENSP00000403974;ENSP00000479881	A0A087WW29;B4DRQ8;Q5VT76;Q6IAJ4;Q8WU48;Q96GD3;Q9UKM5;Q9UKM6	SCMH1	Polycomb protein SCMH1
[truncated: 13,495 more rows]
